# Supplementary material
Source: publisher figshare collection journal article supplement (https://gsapubs.figshare.com/ndownloader/files/24654044)
Supplement: Supplementary file 1 [file 24654044]

## Sheet: Table DR3_U-Th-Pb_UALaserChron
Table S3. U-Th-Pb Isotopic Composition of Detrital Zircons Analyzed at the University of Arizona LaserChron Center
				Isotopic Ratios								Apparent Ages
Analysis	U	206Pb	U/Th	206Pb*	±	207Pb*	±	206Pb*	±	error		206Pb*	±	207Pb*	±	206Pb*	±	Best	±
	(ppm)	204Pb		207Pb*	(%)	235U	(%)	238U	(%)	corr.		238U	Ma	235U	Ma	207Pb*	Ma	age†	Ma
LOM-1 (JG-SCM14)
JG-SCM14-81	369.966	29346.6	1.85118	18.5191	7.5267	0.104743	10.7548	0.0140684	7.68204	0.714292		90.0585	6.87022	101.145	10.3541	370.961	169.699	90.0585	6.87022
JG-SCM14-25	839.376	44143.8	2.85542	20.9791	3.0326	0.0951379	3.19735	0.0144757	1.0131	0.316855		92.6474	0.931894	92.2783	2.82037	82.7233	72.0024	92.6474	0.931894
JG-SCM14-31	360.223	18924.7	1.69806	20.6174	4.92787	0.0972684	5.62737	0.0145447	2.71723	0.48286		93.0859	2.51119	94.2517	5.06522	123.836	116.115	93.0859	2.51119
JG-SCM14-98	594.434	13516.2	1.55117	20.0763	3.70865	0.100684	5.73798	0.0146604	4.37839	0.763055		93.8207	4.07809	97.4079	5.32957	186.112	86.3687	93.8207	4.07809
JG-SCM14-102	982.107	107377	2.16434	20.5698	1.38723	0.100111	1.82444	0.0149352	1.18497	0.649499		95.5667	1.12408	96.8791	1.6858	129.328	32.6285	95.5667	1.12408
JG-SCM14-13	215.782	13789	2.23817	20.9308	6.54311	0.0993437	7.33352	0.0150808	3.31183	0.451602		96.4914	3.17183	96.1703	6.72907	88.2386	155.248	96.4914	3.17183
JG-SCM14-90	114.134	6668.85	1.56501	19.5942	17.8027	0.106688	18.2464	0.0151615	3.99918	0.219177		97.0036	3.85031	102.931	17.8625	242.415	413.088	97.0036	3.85031
JG-SCM14-72	279.322	10236.8	0.994566	20.4607	9.59915	0.103206	9.78582	0.0153152	1.90226	0.194389		97.9798	1.84974	99.731	9.29578	141.8	225.735	97.9798	1.84974
JG-SCM14-64	926.098	52261.9	2.16031	20.5494	2.26861	0.102825	2.91883	0.0153249	1.83657	0.629214		98.0414	1.78698	99.3809	2.76333	131.62	53.3553	98.0414	1.78698
JG-SCM14-79	316.882	37778.8	1.75947	21.3944	7.99935	0.0988141	8.35797	0.0153327	2.422	0.289784		98.0907	2.35778	95.6811	7.63192	35.9997	191.744	98.0907	2.35778
JG-SCM14-8	166.766	4133.85	1.59625	24.8482	17.4846	0.085091	17.5971	0.0153348	1.98706	0.11292		98.1041	1.93463	82.9201	14.0125	-335.235	452.883	98.1041	1.93463
JG-SCM14-59	275.421	22875.4	1.85352	22.7114	8.91396	0.0931375	9.07978	0.0153414	1.72736	0.190243		98.1463	1.6825	90.4219	7.85531	-108.945	219.744	98.1463	1.6825
JG-SCM14-15	323.087	13952.7	1.78715	20.3643	7.31531	0.103957	7.44299	0.015354	1.37271	0.18443		98.226	1.33814	100.422	7.1168	152.866	171.54	98.226	1.33814
JG-SCM14-6	428.448	22774.2	4.99038	20.3957	5.63674	0.103902	5.74979	0.0153695	1.13459	0.197327		98.3246	1.10712	100.372	5.49514	149.267	132.213	98.3246	1.10712
JG-SCM14-28	130.47	12462.3	3.51549	20.3973	20.4633	0.103983	20.6248	0.0153827	2.57626	0.124911		98.4085	2.51601	100.446	19.7276	149.072	484.037	98.4085	2.51601
JG-SCM14-26	394.09	17178.7	3.58387	20.47	6.33909	0.103748	6.61228	0.0154027	1.88099	0.284469		98.5355	1.83935	100.23	6.31099	140.752	148.939	98.5355	1.83935
JG-SCM14-1	232.362	27337.1	3.92218	20.7626	14.9401	0.102341	15.0875	0.0154109	2.1038	0.13944		98.5874	2.0583	98.9347	14.2236	107.336	354.607	98.5874	2.0583
JG-SCM14-85	434.361	17778.7	3.52173	21.5929	5.48937	0.0986691	5.64226	0.0154522	1.30457	0.231214		98.8496	1.27972	95.547	5.14518	13.8862	132.04	98.8496	1.27972
JG-SCM14-71	293.146	23392.2	2.04754	20.9894	5.13417	0.101638	5.44185	0.0154723	1.80391	0.331488		98.9773	1.77183	98.2875	5.09799	81.5626	121.934	98.9773	1.77183
JG-SCM14-2	192.869	13408.4	2.18699	20.9122	8.6806	0.102037	8.8874	0.0154758	1.90607	0.214469		98.9996	1.87259	98.6546	8.35554	90.3158	206.039	98.9996	1.87259
JG-SCM14-76	239.422	13466.3	1.54744	22.5492	6.73324	0.0947647	7.22091	0.015498	2.60863	0.36126		99.1403	2.56642	91.9322	6.34677	-91.3362	165.299	99.1403	2.56642
JG-SCM14-43	554.424	53721.3	1.14018	21.2756	3.5357	0.100485	3.65202	0.0155053	0.914402	0.250382		99.1865	0.900021	97.2236	3.38595	49.3177	84.4559	99.1865	0.900021
JG-SCM14-80	141.636	5695.76	2.26299	19.5562	16.6141	0.109445	16.9357	0.0155232	3.28503	0.193971		99.3002	3.23705	105.458	16.9654	246.923	384.839	99.3002	3.23705
JG-SCM14-9	284.79	11660.1	1.93135	22.069	7.82214	0.0970368	7.98623	0.0155317	1.61063	0.201675		99.3541	1.58795	94.0374	7.1729	-38.8079	190.191	99.3541	1.58795
JG-SCM14-24	456.922	43203	2.78363	20.8629	3.81741	0.102782	4.05343	0.0155522	1.36297	0.336251		99.484	1.34553	99.3413	3.83604	95.9194	90.3841	99.484	1.34553
JG-SCM14-68	186.707	9956.84	2.39144	19.0111	6.12475	0.11282	6.59811	0.0155557	2.45408	0.371937		99.5067	2.42322	108.542	6.7923	311.628	139.508	99.5067	2.42322
JG-SCM14-18	333.531	10867.7	2.20186	17.6525	9.51972	0.121527	10.162	0.0155589	3.55553	0.349884		99.527	3.51154	116.456	11.1813	477.877	210.865	99.527	3.51154
JG-SCM14-36	349.239	26608.3	1.65834	21.2929	3.42986	0.100807	3.78319	0.0155677	1.59643	0.42198		99.5824	1.57755	97.5207	3.51778	47.4005	81.957	99.5824	1.57755
JG-SCM14-10	422.771	19505.1	1.38323	20.9527	2.74675	0.102513	3.16185	0.0155782	1.56609	0.495308		99.6491	1.54859	99.093	2.98515	85.7581	65.1729	99.6491	1.54859
JG-SCM14-120	179.332	6464.02	1.72922	21.3542	9.94679	0.100586	11.2318	0.0155782	5.21685	0.46447		99.6494	5.15859	97.3167	10.4234	40.5499	238.425	99.6494	5.15859
JG-SCM14-93	256.984	17518.1	1.9422	19.5095	7.70241	0.110116	8.45141	0.015581	3.47839	0.411576		99.6669	3.44015	106.071	8.51236	252.428	177.403	99.6669	3.44015
JG-SCM14-32	235.671	24607.7	1.58033	22.8421	12.0724	0.0940864	12.3518	0.0155869	2.61253	0.21151		99.7048	2.58478	91.3029	10.7858	-123.09	298.844	99.7048	2.58478
JG-SCM14-23	306.455	12089.5	2.08822	21.0806	6.24936	0.102022	6.34563	0.0155982	1.10118	0.173534		99.7763	1.09026	98.641	5.96504	71.2728	148.729	99.7763	1.09026
JG-SCM14-53	308.115	13287.8	2.11416	20.0865	7.39351	0.107169	7.8696	0.0156125	2.69567	0.342542		99.8669	2.67134	103.373	7.73475	184.935	172.357	99.8669	2.67134
JG-SCM14-21	484.006	6085.86	1.52735	21.249	4.092	0.101557	4.44487	0.0156512	1.73562	0.390477		100.113	1.72416	98.213	4.16099	52.3404	97.6806	100.113	1.72416
JG-SCM14-84	424.913	30458.3	1.55612	20.5606	3.76287	0.104977	3.97957	0.0156541	1.29528	0.325483		100.131	1.28696	101.36	3.83893	130.353	88.5409	100.131	1.28696
JG-SCM14-19	371.619	28461.1	1.92967	21.2523	7.1592	0.101608	7.22876	0.0156616	1.00035	0.138385		100.178	0.99439	98.2599	6.77021	51.9735	171.05	100.178	0.99439
JG-SCM14-55	536.241	42140	3.11219	20.3386	2.42099	0.106338	2.60099	0.0156858	0.950769	0.365541		100.332	0.946545	102.61	2.53846	155.814	56.6854	100.332	0.946545
JG-SCM14-109	245.556	21171.2	1.73249	21.8916	5.06553	0.0988267	5.56798	0.015691	2.31144	0.415132		100.365	2.30192	95.6927	5.08482	-19.2421	122.592	100.365	2.30192
JG-SCM14-105	185.312	10191.3	2.19613	20.6749	12.7124	0.104951	12.9841	0.0157373	2.64258	0.203523		100.659	2.63933	101.337	12.523	117.279	300.76	100.659	2.63933
JG-SCM14-30	455.604	22770.5	2.10381	20.704	4.50646	0.104822	4.70203	0.0157401	1.34196	0.2854		100.677	1.34055	101.218	4.5298	113.99	106.368	100.677	1.34055
JG-SCM14-67	232.264	23076.4	1.99025	20.8182	8.04519	0.104306	8.13909	0.015749	1.23276	0.151462		100.733	1.23215	100.743	7.8061	100.973	190.521	100.733	1.23215
JG-SCM14-22	308.847	10017.2	1.59436	20.5361	6.44015	0.105741	6.6478	0.0157493	1.64856	0.247985		100.735	1.64777	102.062	6.45511	133.132	151.54	100.735	1.64777
JG-SCM14-58	198.544	15884.8	2.00033	20.2145	8.2508	0.107469	8.36445	0.015756	1.37416	0.164285		100.778	1.37407	103.647	8.24191	170.113	192.914	100.778	1.37407
JG-SCM14-35	366.53	30112.1	1.70555	22.263	8.3087	0.0975855	8.36885	0.0157568	1.00161	0.119683		100.783	1.0016	94.5452	7.55528	-60.0967	202.866	100.783	1.0016
JG-SCM14-61	411.501	22450.6	1.67095	19.9497	4.13683	0.109039	4.23236	0.0157767	0.894125	0.211259		100.909	0.895229	105.086	4.22521	200.855	96.0949	100.909	0.895229
JG-SCM14-16	876.948	54132	2.29876	20.6418	2.30081	0.105396	2.64696	0.0157787	1.3087	0.494415		100.922	1.31048	101.746	2.56263	121.098	54.2193	100.922	1.31048
JG-SCM14-91	488.604	2635.44	1.82962	20.1438	4.93286	0.108054	5.09435	0.0157863	1.27249	0.249785		100.97	1.27483	104.184	5.04431	178.29	115.081	100.97	1.27483
JG-SCM14-88	177.831	5577.58	3.18756	18.1685	7.68695	0.12008	7.96586	0.015823	2.08941	0.262296		101.203	2.09803	115.144	8.6715	413.839	172.036	101.203	2.09803
JG-SCM14-63	143.892	7693.75	2.98467	20.6521	12.5047	0.105754	12.6992	0.0158402	2.21377	0.174324		101.312	2.22528	102.074	12.3329	119.915	295.672	101.312	2.22528
JG-SCM14-54	319.976	12431.9	1.33507	21.2735	7.49897	0.102705	7.62132	0.0158463	1.36013	0.178463		101.351	1.36772	99.2699	7.20773	49.596	179.261	101.351	1.36772
JG-SCM14-73	382.209	19927.5	1.71664	21.1026	7.62981	0.103538	7.69595	0.0158465	1.00679	0.130821		101.352	1.01242	100.037	7.3318	68.7904	181.741	101.352	1.01242
JG-SCM14-66	150.246	5184.32	2.59955	25.4807	19.6502	0.0858304	20.1264	0.0158617	4.3524	0.216253		101.449	4.38091	83.6118	16.1552	-400.359	516.566	101.449	4.38091
JG-SCM14-86	468.71	30756.6	2.12036	19.902	2.74112	0.109894	2.94001	0.0158625	1.06298	0.361555		101.453	1.06998	105.869	2.95579	206.379	63.5791	101.453	1.06998
JG-SCM14-40	292.351	21976	1.69841	21.0074	5.76847	0.104127	6.86503	0.0158647	3.72202	0.542171		101.468	3.74709	100.578	6.57388	79.5264	137.051	101.468	3.74709
JG-SCM14-104	189.121	8819.75	2.24251	22.9279	13.8811	0.0954731	14.1683	0.0158761	2.83853	0.200344		101.54	2.85967	92.5891	12.5386	-132.356	344.583	101.54	2.85967
JG-SCM14-44	402.957	31134.5	2.52284	21.7595	3.86585	0.10062	3.99713	0.0158794	1.01597	0.254175		101.561	1.02374	97.3487	3.71046	-4.62135	93.2948	101.561	1.02374
JG-SCM14-65	223.306	8752.51	1.95174	21.7787	7.71088	0.100688	7.85227	0.0159041	1.48337	0.188909		101.718	1.497	97.4114	7.29368	-6.74547	186.314	101.718	1.497
JG-SCM14-38	295.091	15644.7	1.36034	21.8362	11.94	0.100796	12.1918	0.0159632	2.4651	0.202193		102.093	2.49686	97.511	11.3359	-13.1101	289.379	102.093	2.49686
JG-SCM14-70	76.997	9704.71	0.64403	22.4344	27.2546	0.0982442	28.1475	0.0159853	7.03338	0.249876		102.233	7.13371	95.1543	25.5723	-78.8358	677.646	102.233	7.13371
JG-SCM14-100	407.722	35767.3	1.36464	21.1077	5.7482	0.10464	5.86654	0.0160191	1.17242	0.199848		102.448	1.19162	101.051	5.6428	68.239	136.879	102.448	1.19162
JG-SCM14-78	220.067	4912.81	4.07824	18.6476	8.38997	0.118481	9.50025	0.016024	4.45682	0.469126		102.479	4.53118	113.694	10.2188	355.373	189.767	102.479	4.53118
JG-SCM14-82	348.676	6893.34	2.40002	21.5013	7.75988	0.102786	7.90797	0.0160287	1.52321	0.192617		102.509	1.54907	99.3451	7.48422	24.0513	186.43	102.509	1.54907
JG-SCM14-94	773.894	38279.6	1.65774	20.6988	2.92623	0.106901	3.87219	0.0160482	2.53596	0.654915		102.632	2.5821	103.127	3.79719	114.547	69.0391	102.632	2.5821
JG-SCM14-57	407.206	19892.8	3.05301	20.1054	3.52158	0.110148	3.79015	0.0160616	1.40133	0.369729		102.717	1.42799	106.101	3.81842	182.738	82.0482	102.717	1.42799
JG-SCM14-107	276.504	14797.7	1.92432	22.1574	11.7428	0.100008	12.5672	0.0160714	4.47662	0.356215		102.779	4.56455	96.7838	11.6018	-48.524	286.513	102.779	4.56455
JG-SCM14-110	841.86	56236.2	2.00884	20.4185	2.7384	0.108737	2.8218	0.0161028	0.680967	0.241323		102.978	0.695678	104.81	2.81001	146.664	64.2421	102.978	0.695678
JG-SCM14-17	805.121	41967.8	1.57017	20.5982	2.75984	0.108224	2.9092	0.0161678	0.920176	0.316298		103.391	0.94379	104.34	2.88471	126.08	64.9837	103.391	0.94379
JG-SCM14-42	319.409	19561	2.60732	20.9739	7.24261	0.106511	7.41495	0.0162021	1.58936	0.214346		103.609	1.63355	102.769	7.24743	83.313	172.041	103.609	1.63355
JG-SCM14-56	419.692	1065.67	1.82004	17.8795	6.48776	0.125024	7.88025	0.0162124	4.47295	0.567616		103.674	4.6002	119.617	8.89229	449.568	144.25	103.674	4.6002
JG-SCM14-103	249.105	21645.4	2.36477	21.9138	14.9746	0.102179	15.1372	0.0162397	2.21263	0.146171		103.847	2.27934	98.7859	14.25	-21.6893	364.144	103.847	2.27934
JG-SCM14-49	638.246	18881.5	1.32838	21.764	3.88246	0.102893	4.20131	0.0162414	1.60547	0.382135		103.858	1.65404	99.4435	3.97988	-5.11515	93.7054	103.858	1.65404
JG-SCM14-87	319.966	17393	2.32496	21.1504	4.83548	0.10596	5.30072	0.016254	2.1716	0.409679		103.938	2.23901	102.263	5.15671	63.4427	115.203	103.938	2.23901
JG-SCM14-108	200.191	8341.44	1.9378	22.8638	13.133	0.0981914	13.2714	0.0162825	1.9116	0.144039		104.118	1.97434	95.1055	12.0493	-125.437	325.44	104.118	1.97434
JG-SCM14-97	578.639	27004.7	2.00438	21.094	3.03592	0.10703	3.12644	0.0163743	0.746877	0.238891		104.701	0.775669	103.245	3.06922	69.798	72.2358	104.701	0.775669
JG-SCM14-14	488.476	25162.9	1.45463	21.0254	4.41631	0.108285	4.6058	0.0165125	1.30752	0.283886		105.577	1.3692	104.396	4.56937	77.4864	104.927	105.577	1.3692
JG-SCM14-7	508.258	37574.8	2.29717	21.4016	4.37565	0.106443	4.53538	0.016522	1.19306	0.263057		105.637	1.25005	102.706	4.43031	35.1986	104.813	105.637	1.25005
JG-SCM14-77	483.533	17989.5	1.39413	20.2179	3.92529	0.113134	4.08868	0.0165893	1.14427	0.279864		106.064	1.20374	108.828	4.21949	169.722	91.7109	106.064	1.20374
JG-SCM14-37	205.367	3345.75	2.456	19.2942	8.98005	0.119299	9.13157	0.0166941	1.65657	0.181411		106.729	1.75347	114.436	9.8828	277.898	205.988	106.729	1.75347
JG-SCM14-450	621.054	44776.6	2.13932	21.2605	3.08204	0.108869	3.78255	0.0167872	2.19288	0.579735		107.319	2.33389	104.931	3.77088	51.0116	73.5689	107.319	2.33389
JG-SCM14-11	97.4503	7745.98	4.32158	22.6317	30.2607	0.103239	30.5728	0.0169458	4.35699	0.142512		108.324	4.68025	99.7622	29.0576	-100.307	758.41	108.324	4.68025
JG-SCM14-96	49.6367	4846.46	1.66478	19.8251	19.0536	0.120315	20.2255	0.0172995	6.7846	0.335447		110.566	7.4375	115.358	22.0586	215.399	444.748	110.566	7.4375
JG-SCM14-3	303.729	1013.26	1.59696	16.9265	19.3333	0.142756	20.0212	0.0175251	5.20303	0.259876		111.995	5.77683	135.495	25.401	570.027	424.312	111.995	5.77683
JG-SCM14-2	398.792	21118.9	2.02172	21.667	5.26408	0.116303	6.25999	0.0182763	3.38776	0.541177		116.753	3.91971	111.715	6.62245	5.63168	126.819	116.753	3.91971
JG-SCM14-52	520.1	33802.6	2.2856	21.3655	5.474	0.118714	5.57225	0.0183956	1.04175	0.186953		117.508	1.21305	113.905	6.0041	39.2812	131.03	117.508	1.21305
JG-SCM14-45	1590.5	74005.9	2.32041	20.594	1.62412	0.130654	2.53818	0.0195148	1.95053	0.768478		124.589	2.40681	124.686	2.97816	126.558	38.2085	124.589	2.40681
JG-SCM14-60	326.727	16380.3	1.36674	20.2634	4.15198	0.146467	4.39329	0.0215254	1.43598	0.326857		137.289	1.95059	138.788	5.69904	164.471	97.0685	137.289	1.95059
JG-SCM14-45	78.7602	5144.91	0.520497	18.7169	16.7522	0.178656	16.9845	0.0242522	2.79981	0.164845		154.474	4.27357	166.904	26.1463	346.991	381.211	154.474	4.27357
JG-SCM14-36	53.7754	8402.59	0.986049	23.6551	43.6884	0.14493	44.0557	0.0248647	5.67701	0.12886		158.328	8.87882	137.426	56.6844	-210.151	1144.82	158.328	8.87882
JG-SCM14-48	45.6814	5575.81	0.742516	20.0726	27.339	0.170946	27.7904	0.0248863	4.9883	0.179498		158.464	7.80829	160.239	41.2177	186.539	647.082	158.464	7.80829
JG-SCM14-101	48.1884	3803.34	0.73377	23.4568	36.1261	0.147275	36.7388	0.0250551	6.68182	0.181874		159.525	10.5284	139.503	47.9224	-189.053	929.265	159.525	10.5284
JG-SCM14-41	130.651	14161	0.83885	20.211	10.4374	0.179879	10.8122	0.0263674	2.82211	0.261012		167.773	4.67366	167.957	16.7389	170.523	244.242	167.773	4.67366
JG-SCM14-29	422.352	26958.8	1.07573	20.2286	1.76591	0.1829	1.8657	0.0268336	0.601982	0.322658		170.7	1.0141	170.553	2.92913	168.493	41.2267	170.7	1.0141
JG-SCM14-27	90.014	17168.2	0.389908	20.8525	22.0935	0.177714	22.2883	0.0268769	2.94077	0.131942		170.972	4.96182	166.092	34.1628	97.0718	528.441	170.972	4.96182
JG-SCM14-69	318.33	45060.3	1.28658	20.3639	4.93122	0.183064	5.00141	0.0270373	0.834973	0.166947		171.979	1.41699	170.694	7.85827	152.919	115.57	171.979	1.41699
JG-SCM14-83	85.1906	11872.7	0.900169	20.1871	13.1614	0.187264	13.6662	0.0274174	3.67982	0.269265		174.365	6.33032	174.292	21.8903	173.283	308.267	174.365	6.33032
JG-SCM14-33	1516.36	160771	0.82566	20.0902	0.555657	0.191331	3.45788	0.0278784	3.41294	0.987004		177.256	5.96724	177.764	5.63894	184.505	12.9434	177.256	5.96724
JG-SCM14-95	297.026	39155.6	0.966225	20.3532	5.40311	0.189559	6.01168	0.0279818	2.63565	0.438423		177.904	4.62484	176.253	9.72741	154.132	126.635	177.904	4.62484
JG-SCM14-99	333.716	27765.7	0.863902	20.5515	3.9825	0.191471	4.04262	0.0285395	0.694599	0.171819		181.401	1.24244	177.884	6.59657	131.393	93.7083	181.401	1.24244
JG-SCM14-39	511.773	62234.9	2.02568	19.7712	1.18887	0.233175	2.132	0.033436	1.76974	0.830087		212.017	3.69113	212.817	4.09333	221.697	27.4918	212.017	3.69113
JG-SCM14-5	247.319	44436	0.443637	20.3961	4.05363	0.227643	6.07077	0.0336743	4.51911	0.744404		213.504	9.49044	208.251	11.4307	149.219	95.0364	213.504	9.49044
JG-SCM14-51	120.751	19742.4	2.36342	19.1694	9.20508	0.247025	9.66844	0.0343438	2.95726	0.305867		217.677	6.32981	224.156	19.4493	292.722	210.575	217.677	6.32981
JG-SCM14-74	103.232	12850.3	4.23805	19.6996	4.32942	0.287601	4.51591	0.0410909	1.28434	0.284403		259.592	3.26779	256.669	10.2423	230.037	100.037	259.592	3.26779
JG-SCM14-47	222.255	130087	4.40467	9.2648	0.210866	4.48221	2.48816	0.30118	2.47921	0.996402		1697.16	36.9935	1727.68	20.6588	1764.84	3.8534	1764.84	3.8534
JG-SCM14-106	206.976	104012	5.71212	8.93892	0.31524	4.94571	0.878944	0.320636	0.820467	0.933469		1792.84	12.8413	1810.09	7.42376	1830	5.71483	1830	5.71483
JG-SCM14-75	46.7897	49747.4	0.909033	5.43345	0.474073	13.2761	0.795388	0.523173	0.638669	0.802964		2712.62	14.1413	2699.48	7.51066	2689.65	7.83289	2689.65	7.83289
JG-SCM14-92	61.3224	77394.7	0.99333	5.32448	0.457212	13.7489	1.55748	0.530939	1.48885	0.955941		2745.41	33.286	2732.57	14.7431	2723.08	7.53377	2723.08	7.53377
LOM-2 (JG-SCM7)
JG-SCM7-30	118.614	5557.9	0.864096	22.0314	20.2049	0.0802386	20.4209	0.0128211	2.96203	0.145049		82.1245	2.41712	78.3692	15.4028	-34.6624	494.523	82.1245	2.41712
JG-SCM7-49	626.661	30803	1.28191	21.0233	4.74083	0.0860227	4.99988	0.0131163	1.5885	0.317707		84.0036	1.32574	83.7916	4.02129	77.7292	112.664	84.0036	1.32574
JG-SCM7-58	531.605	14203.3	2.01139	21.1604	6.80413	0.0902328	6.88104	0.013848	1.02596	0.149099		88.6574	0.903362	87.7202	5.78275	62.2688	162.24	88.6574	0.903362
JG-SCM7-42	243.173	2504.47	1.17319	19.7221	11.4619	0.0969114	12.1798	0.013862	4.11977	0.338246		88.7466	3.63111	93.9213	10.9267	227.445	265.585	88.7466	3.63111
JG-SCM7-107	244.523	11218.8	1.15438	20.8638	14.5664	0.0924064	14.7054	0.0139828	2.0172	0.137175		89.5145	1.79321	89.7425	12.6312	95.8036	346.386	89.5145	1.79321
JG-SCM7-28	333.949	12652.9	2.84277	22.7406	8.0188	0.0857322	8.14999	0.0141398	1.45643	0.178703		90.5128	1.30904	83.5199	6.53452	-112.112	197.757	90.5128	1.30904
JG-SCM7-10	209.793	11273.9	1.37213	21.5354	10.5884	0.0906057	11.1559	0.0141517	3.51301	0.3149		90.5879	3.16011	88.0675	9.41102	20.2894	254.847	90.5879	3.16011
JG-SCM7-57	765.408	3412.61	1.33137	19.6429	6.15842	0.099494	6.6308	0.0141743	2.45791	0.370681		90.732	2.21449	96.3092	6.09263	236.696	142.179	90.732	2.21449
JG-SCM7-59	274.68	8269.79	2.3744	22.909	11.6062	0.0854837	11.7271	0.0142033	1.67984	0.143244		90.9161	1.51653	83.2875	9.37763	-130.32	287.639	90.9161	1.51653
JG-SCM7-92	62.1145	2622.39	1.08972	29.2193	33.0787	0.0671	33.6999	0.0142197	6.44043	0.191111		91.0207	5.82093	65.9438	21.5199	-771.421	953.615	91.0207	5.82093
JG-SCM7-84	347.589	9597.6	2.51245	20.9502	8.56705	0.0942662	9.31656	0.0143233	3.66115	0.392972		91.6788	3.33274	91.4698	8.14944	86.0442	203.488	91.6788	3.33274
JG-SCM7-21	148.482	9563.83	0.628882	20.5973	7.80483	0.0981763	8.59143	0.0146661	3.59127	0.418006		93.8574	3.34625	95.0916	7.79899	126.182	183.96	93.8574	3.34625
JG-SCM7-40	427.687	17995.7	2.31019	21.0424	3.60603	0.0975603	4.02646	0.0148891	1.79135	0.444894		95.2737	1.69413	94.5218	3.63413	75.5667	85.6989	95.2737	1.69413
JG-SCM7-16	513.578	24749.8	1.74323	22.3975	3.18589	0.0926352	3.51449	0.0150479	1.48383	0.422204		96.2822	1.41805	89.9552	3.02548	-74.8119	77.8941	96.2822	1.41805
JG-SCM7-36	147.01	8081.38	1.8017	21.6321	15.6592	0.0962819	15.927	0.0151057	2.90862	0.182622		96.6497	2.79021	93.3384	14.2041	9.48978	378.714	96.6497	2.79021
JG-SCM7-77	577.259	21535.3	1.39958	20.8375	4.06184	0.100071	4.28376	0.0151236	1.36088	0.317683		96.763	1.30699	96.8421	3.95681	98.771	96.1615	96.763	1.30699
JG-SCM7-104	115.22	3837.74	2.70474	23.9772	24.5508	0.0870275	24.8856	0.015134	4.06812	0.163473		96.8292	3.90969	84.7306	20.2326	-244.221	628.393	96.8292	3.90969
JG-SCM7-74	130.038	5603.81	0.810216	24.0146	19.6343	0.0869901	19.8476	0.0151511	2.90244	0.146236		96.9377	2.79251	84.6956	16.1294	-248.162	500.64	96.9377	2.79251
JG-SCM7-106	120.705	9567.63	0.856202	21.1757	20.1317	0.0993892	20.5627	0.0152643	4.18811	0.203675		97.6565	4.05914	96.2123	18.8776	60.5552	483.913	97.6565	4.05914
JG-SCM7-105	109.528	4157.31	0.738925	22.9249	35.0352	0.0922019	35.2873	0.0153302	4.21013	0.11931		98.0748	4.09783	89.5525	30.2561	-132.038	889.768	98.0748	4.09783
JG-SCM7-12	179.668	17103.2	3.44176	22.0008	13.8408	0.0964704	13.9645	0.0153933	1.85495	0.132833		98.4753	1.81279	93.513	12.476	-31.2866	336.95	98.4753	1.81279
JG-SCM7-80	380.726	4306.4	1.97127	19.8973	7.93392	0.107081	8.61137	0.0154527	3.34792	0.388779		98.8526	3.28426	103.292	8.45756	206.957	184.263	98.8526	3.28426
JG-SCM7-41	83.9669	6871.18	1.05539	20.6454	23.8186	0.103439	24.4084	0.0154883	5.33316	0.218497		99.079	5.24364	99.9457	23.237	120.677	568.234	99.079	5.24364
JG-SCM7-53	647.815	24517.3	1.11235	20.6083	4.31203	0.103874	4.53085	0.0155256	1.39102	0.307011		99.3157	1.37092	100.346	4.32913	124.877	101.593	99.3157	1.37092
JG-SCM7-13	547.038	27701.7	1.22628	20.0166	2.67503	0.107324	3.59154	0.0155807	2.39654	0.667272		99.6651	2.37014	103.515	3.53455	193.084	62.2116	99.6651	2.37014
JG-SCM7-112	662.907	43906.2	1.76972	21.5574	4.77705	0.099721	4.97089	0.0155913	1.3746	0.27653		99.7326	1.36037	96.5188	4.5769	17.7936	114.801	99.7326	1.36037
JG-SCM7-32	52.7721	2551.18	8.88115	22.096	36.919	0.0977705	38.0266	0.0156683	9.11106	0.239597		100.221	9.06059	94.7163	34.4017	-41.777	924.621	100.221	9.06059
JG-SCM7-87	317.901	21563.4	1.15863	21.7607	8.18011	0.099541	8.27777	0.0157099	1.26782	0.153159		100.485	1.26409	96.3526	7.60926	-4.74842	197.629	100.485	1.26409
JG-SCM7-86	486.766	20223.5	2.74177	20.3734	5.52461	0.106749	5.64582	0.0157735	1.16363	0.206104		100.889	1.16483	102.987	5.52939	151.819	129.536	100.889	1.16483
JG-SCM7-7	1175.33	37036.6	1.14332	21.02	2.35485	0.1035	2.47247	0.0157787	0.753498	0.304755		100.922	0.754524	100.002	2.35466	78.0949	55.9424	100.922	0.754524
JG-SCM7-35	421.694	4590.82	0.741917	19.4517	5.48394	0.112179	10.6253	0.0158258	9.10072	0.856515		101.221	9.13989	107.956	10.8824	259.229	126.06	101.221	9.13989
JG-SCM7-62	1120.1	47314.3	0.816384	20.9748	1.3372	0.105131	2.70534	0.0159929	2.35175	0.869301		102.281	2.38641	101.502	2.61318	83.2173	31.709	102.281	2.38641
JG-SCM7-102	261.024	22310.7	0.669733	21.6625	8.94047	0.102338	9.28639	0.0160785	2.51099	0.270394		102.824	2.56142	98.9324	8.75409	6.15168	215.592	102.824	2.56142
JG-SCM7-78	342.668	23864.1	1.92578	21.1075	4.48317	0.105283	4.75405	0.0161173	1.58183	0.332732		103.071	1.61743	101.641	4.59813	68.2533	106.704	103.071	1.61743
JG-SCM7-94	266.868	19387.1	0.869015	20.3932	7.86296	0.109044	8.08421	0.0161282	1.87839	0.232353		103.139	1.92194	105.09	8.07104	149.551	184.517	103.139	1.92194
JG-SCM7-91	90.039	3394.87	1.10997	24.4037	16.4721	0.0911916	17.1606	0.0161402	4.81221	0.280422		103.216	4.9274	88.6128	14.5628	-288.979	422.399	103.216	4.9274
JG-SCM7-82	411.728	14855.8	2.3729	22.367	4.5626	0.102457	4.63007	0.0166206	0.787521	0.170088		106.263	0.829981	99.0414	4.36916	-71.4794	111.541	106.263	0.829981
JG-SCM7-110	419.519	38730.5	0.726411	21.8738	4.40582	0.106579	4.46764	0.0169081	0.740638	0.165778		108.086	0.793849	102.831	4.36919	-17.2758	106.593	108.086	0.793849
JG-SCM7-85	109.796	6277.2	2.40867	20.8298	22.9346	0.112104	23.1193	0.0169359	2.91656	0.126153		108.261	3.13115	107.889	23.668	99.6442	548.781	108.261	3.13115
JG-SCM7-95	77.7423	3598.29	1.55514	32.7025	28.4028	0.0717956	28.6876	0.0170286	4.03175	0.14054		108.849	4.35168	70.402	19.5148	-1100.57	874.87	108.849	4.35168
JG-SCM7-70	205.843	8642.1	2.44275	21.5717	16.6905	0.108913	16.7896	0.0170397	1.82184	0.10851		108.919	1.96767	104.97	16.7452	16.2299	403.433	108.919	1.96767
JG-SCM7-67	1184.26	53032.1	2.29808	20.7308	0.974041	0.11604	1.08275	0.0174471	0.472851	0.436714		111.501	0.5227	111.476	1.1431	110.936	22.985	111.501	0.5227
JG-SCM7-22	536.155	10284	1.62624	21.0418	4.74822	0.115318	4.86931	0.0175986	1.07916	0.221625		112.461	1.20311	110.818	5.11209	75.6343	112.884	112.461	1.20311
JG-SCM7-25	290.929	19101.3	1.01244	21.6348	7.15979	0.11278	7.40955	0.0176963	1.90758	0.257449		113.08	2.13829	108.505	7.62522	9.20885	172.443	113.08	2.13829
JG-SCM7-24	398.124	21541.4	2.43467	20.8828	5.11165	0.117974	5.42295	0.0178679	1.81089	0.333932		114.167	2.04924	113.234	5.81064	93.6752	121.125	114.167	2.04924
JG-SCM7-81	87.2946	5646.65	3.24334	18.6461	32.9321	0.132492	33.6094	0.0179175	6.71319	0.199741		114.481	7.6175	126.335	39.9457	355.585	762.475	114.481	7.6175
JG-SCM7-2	385.821	24209.5	1.75085	20.7976	3.90331	0.120583	4.1241	0.0181886	1.33132	0.322815		116.197	1.5331	115.601	4.50614	103.309	92.3074	116.197	1.5331
JG-SCM7-113	604.045	67777.6	2.75434	20.5841	4.10752	0.122256	4.27775	0.0182516	1.19477	0.279299		116.596	1.38054	117.115	4.73179	127.688	96.6946	116.596	1.38054
JG-SCM7-51	512.583	48076.5	1.10951	20.5769	1.4674	0.122571	1.79174	0.0182922	1.02814	0.57382		116.854	1.19059	117.4	1.98646	128.517	34.5137	116.854	1.19059
JG-SCM7-6	124.202	5171.27	1.81863	21.5156	7.1743	0.117279	7.96749	0.0183008	3.46559	0.434966		116.908	4.01504	112.602	8.49219	22.4865	172.367	116.908	4.01504
JG-SCM7-27	512.817	19181.7	2.44023	20.9077	5.26489	0.121068	5.39772	0.0183585	1.19007	0.220476		117.273	1.38301	116.04	5.91893	90.829	124.809	117.273	1.38301
JG-SCM7-48	306.904	32841.5	1.487	20.3681	6.95513	0.134196	7.22095	0.0198239	1.9412	0.268829		126.543	2.43249	127.861	8.67533	152.462	163.078	126.543	2.43249
JG-SCM7-23	343.829	21092	0.934201	20.8398	2.66125	0.155726	3.17894	0.0235371	1.73879	0.546972		149.972	2.5776	146.955	4.34931	98.5318	62.9819	149.972	2.5776
JG-SCM7-68	159.039	8008.15	1.09907	25.2372	10.9495	0.128661	11.178	0.0235497	2.24859	0.201162		150.051	3.33507	122.894	12.939	-375.375	284.835	150.051	3.33507
JG-SCM7-39	319.064	26362.4	0.302677	20.1492	7.65157	0.161967	8.03615	0.0236691	2.45626	0.305651		150.803	3.66112	152.423	11.3744	177.673	178.638	150.803	3.66112
JG-SCM7-15	63.1863	4916.88	0.836451	18.9269	27.3831	0.172607	27.5153	0.023694	2.69329	0.0978836		150.96	4.01855	161.679	41.1479	321.736	632.688	150.96	4.01855
JG-SCM7-44	210.336	15384.5	0.831255	20.6057	7.86706	0.159077	7.95714	0.0237735	1.19387	0.150038		151.46	1.78717	149.895	11.0891	125.176	185.457	151.46	1.78717
JG-SCM7-97	157.425	7776.04	0.519144	22.2874	8.13362	0.148342	8.61048	0.0239786	2.82571	0.328171		152.752	4.26559	140.447	11.2946	-62.7734	198.676	152.752	4.26559
JG-SCM7-66	138.888	1272.62	0.830386	18.6353	12.7819	0.177951	13.4575	0.024051	4.21033	0.312862		153.208	6.37451	166.296	20.6455	356.857	289.622	153.208	6.37451
JG-SCM7-61	146.573	7895.07	0.351252	20.175	7.53831	0.168264	7.7757	0.0246208	1.90665	0.245206		156.793	2.95344	157.911	11.372	174.688	176.078	156.793	2.95344
JG-SCM7-5	105.304	9630.21	0.833063	19.8744	13.0211	0.170944	13.1904	0.0246404	2.10672	0.159716		156.917	3.26588	160.238	19.5551	209.617	302.938	156.917	3.26588
JG-SCM7-64	110.544	7317.42	0.572123	22.114	10.9506	0.155423	11.6166	0.0249276	3.87678	0.333729		158.724	6.07824	146.689	15.8678	-43.7555	266.816	158.724	6.07824
JG-SCM7-119	142.08	13391.4	0.335987	21.1675	11.8356	0.162556	12.1215	0.0249558	2.61708	0.215904		158.901	4.10773	152.938	17.2114	61.5099	282.824	158.901	4.10773
JG-SCM7-65	180.087	19831.1	0.751945	19.6947	13.9799	0.174872	14.3815	0.0249787	3.37495	0.234673		159.045	5.30201	163.639	21.7386	230.609	324.215	159.045	5.30201
JG-SCM7-90	188.971	23712.6	0.810579	22.702	7.12265	0.151887	7.38519	0.0250082	1.95164	0.264264		159.23	3.06954	143.576	9.88816	-107.927	175.448	159.23	3.06954
JG-SCM7-33	44.0152	5998.44	1.04144	12.8811	317.948	0.269137	317.975	0.0251434	4.13936	0.0130179		160.081	6.54472	242.003	831.193	1137.52	1487.13	160.081	6.54472
JG-SCM7-101	72.7337	2364.46	0.634688	17.9393	20.0859	0.194126	20.7233	0.0252574	5.1001	0.246105		160.798	8.09941	180.144	34.2205	442.143	450.84	160.798	8.09941
JG-SCM7-88	210.625	69287.8	0.290542	20.2416	5.97565	0.172599	7.02469	0.0253387	3.69294	0.525709		161.308	5.88311	161.672	10.4993	166.985	139.73	161.308	5.88311
JG-SCM7-31	78.5554	3129.09	0.721855	19.2007	18.3153	0.182927	18.6018	0.0254739	3.2523	0.174838		162.158	5.2081	170.576	29.2163	288.96	421.634	162.158	5.2081
JG-SCM7-72	579.485	38413.4	0.938716	20.5438	1.41699	0.171848	2.3804	0.0256049	1.9127	0.803521		162.982	3.07828	161.021	3.54449	132.295	33.302	162.982	3.07828
JG-SCM7-96	72.2734	5348.76	1.0544	18.7722	16.2802	0.18871	16.9201	0.0256926	4.60932	0.272417		163.533	7.44297	175.528	27.2807	340.349	370.797	163.533	7.44297
JG-SCM7-45	163.551	19239.4	0.718186	20.1819	11.7936	0.17562	11.8877	0.025706	1.49215	0.125521		163.617	2.4107	164.285	18.0335	173.888	276.004	163.617	2.4107
JG-SCM7-52	142.195	11022.4	0.34602	20.3407	5.25847	0.174514	5.50681	0.025745	1.63504	0.296913		163.863	2.64546	163.329	8.30828	155.594	123.209	163.863	2.64546
JG-SCM7-34	387.5	27697	0.524209	19.9776	3.24362	0.178315	4.01409	0.0258363	2.36471	0.589103		164.436	3.83927	166.609	6.16806	197.594	75.3749	164.436	3.83927
JG-SCM7-114	287.99	22687	1.05665	20.2179	3.52315	0.177608	3.77529	0.0260434	1.35657	0.359327		165.738	2.21968	166	5.78159	169.724	82.2921	165.738	2.21968
JG-SCM7-93	109.934	18639.1	0.616528	19.5062	14.2545	0.184888	14.3673	0.0261566	1.79698	0.125075		166.449	2.95277	172.258	22.7672	252.816	329.298	166.449	2.95277
JG-SCM7-3	401.556	34780.9	0.973935	19.8332	4.53224	0.182216	5.37514	0.0262107	2.8898	0.537623		166.788	4.75803	169.965	8.41238	214.446	105.031	166.788	4.75803
JG-SCM7-99	341.554	39538.9	3.12318	20.2046	2.42801	0.179672	3.06792	0.0263287	1.87534	0.611275		167.53	3.10128	167.778	4.74455	171.256	56.7011	167.53	3.10128
JG-SCM7-17	215.619	5813.41	1.00708	20.1033	4.14184	0.180903	4.39538	0.0263761	1.47124	0.334725		167.827	2.43729	168.837	6.83697	182.986	96.5187	167.827	2.43729
JG-SCM7-4	289.34	28834.3	1.14805	20.8476	4.18522	0.174573	4.27422	0.0263957	0.867696	0.203007		167.951	1.43848	163.38	6.45046	97.6725	99.0687	167.951	1.43848
JG-SCM7-9	180.386	13658.4	1.19686	20.5538	7.38366	0.177326	7.48426	0.0264341	1.22302	0.163412		168.192	2.03042	165.757	11.4465	131.121	173.854	168.192	2.03042
JG-SCM7-55	595.943	50208.9	0.40562	19.8343	2.19408	0.184071	2.99794	0.026479	2.04295	0.681451		168.474	3.39724	171.558	4.7322	214.321	50.8247	168.474	3.39724
JG-SCM7-89	390.894	32670.5	0.495322	20.6234	4.2164	0.177378	4.28246	0.0265313	0.74929	0.174967		168.802	1.2484	165.802	6.55109	123.158	99.3373	168.802	1.2484
JG-SCM7-103	727.556	38161.6	0.978282	20.2731	1.78586	0.180482	2.0612	0.0265371	1.0292	0.49932		168.839	1.71513	168.475	3.19983	163.353	41.7374	168.839	1.71513
JG-SCM7-118	136.082	10564.3	1.20377	21.9853	7.88442	0.166971	8.26271	0.0266241	2.47152	0.299117		169.385	4.13185	156.787	12.0048	-29.5881	191.349	169.385	4.13185
JG-SCM7-111	214.485	16513.5	0.845556	21.323	4.57735	0.172986	4.87357	0.026752	1.67319	0.343319		170.188	2.81031	162.007	7.29798	44.0161	109.467	170.188	2.81031
JG-SCM7-43	461.671	31435.4	0.752786	20.5419	3.4411	0.180183	3.94915	0.0268444	1.93768	0.490658		170.768	3.2655	168.218	6.12215	132.485	80.9402	170.768	3.2655
JG-SCM7-26	60.2712	7361.2	1.40972	28.5352	35.9486	0.130902	36.0882	0.027091	3.17116	0.0878726		172.316	5.39204	124.908	42.4393	-705.091	1026.21	172.316	5.39204
JG-SCM7-79	423.313	32841.7	0.850704	20.8865	2.8325	0.182227	3.30509	0.0276044	1.7031	0.515295		175.538	2.94924	169.975	5.17284	93.2122	67.1215	175.538	2.94924
JG-SCM7-14	129.937	5628.12	1.28942	18.9987	5.44268	0.204717	6.3231	0.0282082	3.21852	0.509009		179.325	5.69205	189.109	10.9105	313.094	123.895	179.325	5.69205
JG-SCM7-47	510.904	43538.5	0.762006	19.4328	1.53103	0.200657	2.71131	0.0282806	2.23767	0.825308		179.778	3.96726	185.682	4.60095	261.438	35.1661	179.778	3.96726
JG-SCM7-108	199.29	24258.4	0.413755	20.1075	6.75782	0.208032	7.37293	0.0303379	2.94821	0.39987		192.663	5.59607	191.9	12.8927	182.498	157.586	192.663	5.59607
JG-SCM7-60	40.2794	4506.76	2.33231	17.4162	16.7798	0.305779	17.0311	0.0386242	2.91456	0.171132		244.3	6.98703	270.904	40.5173	507.596	371.381	244.3	6.98703
JG-SCM7-19	55.189	6117.95	1.36038	18.2187	13.7129	0.292703	16.4421	0.0386761	9.07193	0.55175		244.622	21.7762	260.685	37.8195	407.669	308.123	244.622	21.7762
JG-SCM7-76	134.676	11372	1.24876	20.9283	6.37236	0.255203	6.55177	0.0387363	1.52273	0.232416		244.995	3.66062	230.794	13.5265	88.5222	151.169	244.995	3.66062
JG-SCM7-8	160.152	18857.3	1.73622	19.4834	5.21379	0.276322	5.67365	0.0390462	2.23756	0.394377		246.918	5.42046	247.736	12.473	255.485	119.912	246.918	5.42046
JG-SCM7-56	140.94	14784.4	1.61653	19.6339	4.20269	0.274864	5.26833	0.0391403	3.1769	0.603019		247.502	7.71386	246.575	11.5339	237.788	96.9828	247.502	7.71386
JG-SCM7-54	200.598	30881	1.7559	19.7194	3.6168	0.274636	4.40216	0.039278	2.50954	0.570069		248.356	6.11406	246.393	9.63119	227.744	83.592	248.356	6.11406
JG-SCM7-20	61.9158	7489.93	1.14521	23.3941	11.1679	0.232095	11.2787	0.0393796	1.57712	0.139831		248.986	3.85195	211.926	21.5763	-182.374	279.547	248.986	3.85195
JG-SCM7-46	86.9063	9983.95	0.971635	20.3466	10.2821	0.267676	10.8455	0.0395003	3.45011	0.318115		249.735	8.45136	240.834	23.2571	154.933	241.283	249.735	8.45136
JG-SCM7-120	94.4343	11378.5	2.59859	19.2533	5.92902	0.283781	6.68843	0.0396266	3.09544	0.462805		250.518	7.60588	253.652	15.0134	282.757	135.725	250.518	7.60588
JG-SCM7-29	275.856	17845.4	1.9544	19.3963	2.29867	0.29788	2.58937	0.0419044	1.19202	0.460353		264.627	3.09054	264.743	6.03442	265.752	52.7317	264.627	3.09054
JG-SCM7-63	196.217	50816.3	1.22307	19.0397	3.43156	0.307341	3.75023	0.0424405	1.51282	0.403393		267.942	3.97039	272.118	8.95223	308.171	78.1677	267.942	3.97039
JG-SCM7-50	155.539	18379.5	1.35889	18.6619	4.73136	0.31622	4.83517	0.0428	0.996544	0.206103		270.165	2.63668	278.991	11.7957	353.644	106.91	270.165	2.63668
JG-SCM7-37	153.85	21176.2	1.57751	19.6405	3.90774	0.301697	4.00693	0.0429757	0.886026	0.221123		271.251	2.35349	267.725	9.43007	236.995	90.1465	271.251	2.35349
JG-SCM7-38	92.9001	19766.1	1.32985	20.7337	6.88804	0.28761	7.1415	0.0432493	1.88573	0.264052		272.942	5.03952	256.677	16.1986	110.602	162.779	272.942	5.03952
JG-SCM7-71	735.018	128943	1.42186	19.2579	0.604583	0.315016	0.846685	0.0439988	0.592752	0.700086		277.572	1.61039	278.062	2.05946	282.208	13.8436	277.572	1.61039
JG-SCM7-98	41.9357	24764.6	1.66453	13.7211	3.49802	1.78183	3.69724	0.177318	1.19725	0.323824		1052.31	11.6242	1038.85	24.0505	1010.61	70.9369	1010.61	70.9369
JG-SCM7-73	104.139	42765.9	1.48777	13.1314	1.4657	1.91055	1.57685	0.181957	0.581532	0.368793		1077.66	5.77111	1084.78	10.5104	1099.12	29.3259	1099.12	29.3259
JG-SCM7-83	128.66	94879.9	2.36737	13.0848	0.751732	1.98923	1.18883	0.188778	0.920985	0.774699		1114.75	9.42806	1111.86	8.03312	1106.2	15.0444	1106.2	15.0444
JG-SCM7-1	66.3813	38958.9	1.71699	11.638	1.22845	2.73841	1.43793	0.231141	0.74737	0.519754		1340.47	9.04529	1338.94	10.6954	1336.48	23.7515	1336.48	23.7515
JG-SCM7-18	120.406	58916.2	1.54528	11.2488	0.494028	2.88145	4.48943	0.235081	4.46216	0.993927		1361.07	54.7514	1377.07	33.8531	1401.95	9.46529	1401.95	9.46529
JG-SCM7-115	317.43	237973	2.01978	9.35526	0.318793	4.69779	1.29122	0.318748	1.25124	0.969043		1783.61	19.4961	1766.85	10.8102	1747.06	5.83684	1747.06	5.83684
JG-SCM7-100	160.161	72599.5	1.58722	9.34127	0.865979	4.28619	1.80594	0.290386	1.58477	0.877533		1643.46	22.9902	1690.71	14.8694	1749.8	15.8532	1749.8	15.8532
JG-SCM7-116	75.1967	39209	1.78672	9.33718	1.13908	4.55	1.64589	0.308124	1.18805	0.721828		1731.47	18.0398	1740.16	13.7018	1750.61	20.8515	1750.61	20.8515
JG-SCM7-11	271.333	558397	1.32439	9.23961	0.221766	4.64223	0.691186	0.311085	0.654643	0.94713		1746.05	10.0132	1756.9	5.77438	1769.81	4.05008	1769.81	4.05008
VQ-1 (JG-SCM15)
JG-SCM15-124	323.664	2187.7	2.46084	18.9509	28.3691	0.020458	29.976	0.00281183	9.68256	0.32301		18.1008	1.75016	20.563	6.10205	318.815	656.65	18.1008	1.75016
JG-SCM15-96	858.6	6974.61	3.21659	24.6722	16.5641	0.0159941	17.1692	0.00286198	4.518	0.263145		18.4231	0.83117	16.1117	2.74443	-316.963	427.194	18.4231	0.83117
JG-SCM15-104	363.383	2188.51	2.37164	30.1376	66.1029	0.013094	66.307	0.00286207	5.19783	0.0783904		18.4237	0.956267	13.2091	8.70207	-859.508	2112.51	18.4237	0.956267
JG-SCM15-21	307.433	2577.68	0.739326	18.3746	35.1735	0.021647	35.8577	0.0028848	6.97128	0.194415		18.5698	1.29269	21.7455	7.71468	388.567	812.775	18.5698	1.29269
JG-SCM15-80	184.014	1459.44	0.563026	18.7397	242.475	0.0216073	242.542	0.00293671	5.70869	0.0235369		18.9035	1.07756	21.706	52.1333	344.231	0	18.9035	1.07756
JG-SCM15-22	251.527	2120.63	1.19353	24.7553	51.7818	0.0173955	52.4652	0.00312323	8.44051	0.160878		20.1022	1.69409	17.5112	9.10879	-325.595	1415.32	20.1022	1.69409
JG-SCM15-33	1196.79	9510.83	0.724451	21.5073	10.6058	0.0233469	10.76	0.00364177	1.81514	0.168693		23.4337	0.424584	23.4335	2.49259	23.388	255.108	23.4337	0.424584
JG-SCM15-27	259.813	5009.92	0.725155	23.5546	51.7816	0.0213365	52.3411	0.003645	7.63267	0.145826		23.4544	1.78695	21.4368	11.1031	-199.471	1381.5	23.4544	1.78695
JG-SCM15-47	241.439	2560.96	0.521134	45.4611	59.2201	0.0119656	59.4287	0.00394524	4.97467	0.0837083		25.3826	1.26022	12.0776	7.13514	NA	NA	25.3826	1.26022
JG-SCM15-1	265.884	3551.88	1.29552	21.6587	30.4991	0.0252046	31.7077	0.00395923	8.67083	0.273461		25.4725	2.20432	25.2751	7.91541	6.55005	749.35	25.4725	2.20432
JG-SCM15-75	277.009	2878.61	0.932201	21.5525	35.3159	0.0269382	35.5437	0.0042108	4.01787	0.11304		27.0875	1.08606	26.9906	9.46736	18.3918	872.194	27.0875	1.08606
JG-SCM15-74	188.991	956.856	0.646154	27.4648	41.012	0.0217363	41.2734	0.00432974	4.63836	0.112381		27.8511	1.28904	21.8342	8.91577	-599.998	1155.4	27.8511	1.28904
JG-SCM15-111	679.103	8216.05	1.79243	23.7859	8.90354	0.0255024	10.2886	0.00439947	5.15585	0.501122		28.2986	1.45584	25.5701	2.59796	-224.014	224.496	28.2986	1.45584
JG-SCM15-115	157.888	2452.78	1.33648	-3.14012	1210.25	-0.194027	1210.28	0.00441884	9.12755	0.00754167		28.4229	2.58861	-219.024	#NUM!	NA	NA	28.4229	2.58861
JG-SCM15-71	536.187	4966.33	2.73184	25.1244	15.3063	0.0246089	16.0106	0.00448422	4.69638	0.293329		28.8425	1.35153	24.685	3.90459	-363.764	398.141	28.8425	1.35153
JG-SCM15-24	590.519	34168.3	1.10508	20.9988	4.52446	0.0908607	5.04008	0.0138379	2.22073	0.440614		88.5933	1.95396	88.3049	4.26262	80.4928	107.44	88.5933	1.95396
JG-SCM15-41	199.647	9519.93	0.935842	23.0273	14.8407	0.0845053	15.0818	0.0141132	2.68585	0.178085		90.3435	2.40956	82.3719	11.9331	-143.061	369.391	90.3435	2.40956
JG-SCM15-4	320.084	4765.03	1.13744	20.4994	8.20081	0.0961859	8.80842	0.0143005	3.21481	0.36497		91.5341	2.92186	93.2495	7.84809	137.383	192.903	91.5341	2.92186
JG-SCM15-89	79.1389	3081.81	0.797803	19.5579	46.3921	0.100934	46.6454	0.0143171	4.85358	0.104053		91.6398	4.41635	97.6377	43.4488	246.685	1124.99	91.6398	4.41635
JG-SCM15-92	412.225	10660.3	0.980519	21.38	7.17275	0.0933924	7.83332	0.0144816	3.14843	0.401928		92.6851	2.89725	90.6586	6.79388	37.6154	171.83	92.6851	2.89725
JG-SCM15-118	521.92	19602.3	1.51443	21.135	4.31724	0.0956767	4.65786	0.0146659	1.74845	0.375377		93.8557	1.62914	92.7778	4.12993	65.1232	102.809	93.8557	1.62914
JG-SCM15-82	132.319	4433.63	0.610329	22.2482	23.0732	0.091358	23.6616	0.0147414	5.24355	0.221606		94.3357	4.91052	88.7676	20.1145	-58.4737	568.806	94.3357	4.91052
JG-SCM15-76	719.611	47358.9	1.42152	21.0551	3.88826	0.0966312	4.0004	0.0147562	0.940551	0.235114		94.4294	0.881683	93.6619	3.57925	74.162	92.4289	94.4294	0.881683
JG-SCM15-25	110.835	8315.31	1.37062	25.3683	33.6009	0.0807191	33.8278	0.0148514	3.91135	0.115625		95.0342	3.68985	78.8208	25.6602	-388.846	895.437	95.0342	3.68985
JG-SCM15-99	496.31	12584.2	1.54371	20.8676	5.37431	0.0988967	5.74059	0.0149676	2.0177	0.35148		95.7725	1.91812	95.7574	5.24584	95.4033	127.295	95.7725	1.91812
JG-SCM15-29	566.219	20430.9	1.33466	21.9483	5.28341	0.0941781	5.35028	0.0149917	0.843246	0.157608		95.9253	0.802898	91.388	4.67596	-25.506	128.046	95.9253	0.802898
JG-SCM15-105	294.254	13324.5	0.862958	20.9478	5.34107	0.0995591	5.79636	0.0151258	2.25183	0.388491		96.777	2.16298	96.3693	5.32907	86.3132	126.742	96.777	2.16298
JG-SCM15-50	140.133	5044.3	0.624529	20.8146	25.9686	0.100244	26.1381	0.015133	2.97226	0.113713		96.8227	2.85631	97.0014	24.1855	101.374	623.23	96.8227	2.85631
JG-SCM15-28	94.0152	3668.43	0.551825	18.4924	20.3956	0.112906	20.5988	0.0151429	2.88583	0.140097		96.8854	2.77504	108.62	21.2223	374.203	463.346	96.8854	2.77504
JG-SCM15-78	470.188	11990.5	0.50127	21.6451	5.97374	0.0965053	6.03852	0.0151499	0.882127	0.146083		96.93	0.84865	93.5454	5.39641	8.03877	143.857	96.93	0.84865
JG-SCM15-120	217.305	12031.8	1.45874	21.7996	12.7317	0.0958341	12.7833	0.0151519	1.14795	0.0898004		96.9428	1.10453	92.9236	11.3519	-9.06179	308.469	96.9428	1.10453
JG-SCM15-3	164.476	7274.59	1.10715	25.393	18.2283	0.0825686	18.3045	0.0152064	1.66847	0.0911508		97.2892	1.61105	80.557	14.1767	-391.375	477.793	97.2892	1.61105
JG-SCM15-45	106.113	5172.96	1.20481	27.576	43.531	0.0761003	43.6181	0.0152201	2.75439	0.063148		97.3756	2.66195	74.4719	31.3305	-610.991	1235.26	97.3756	2.66195
JG-SCM15-77	171.765	6413.98	2.87214	22.4324	14.3252	0.0937729	14.503	0.0152564	2.26387	0.156097		97.6062	2.19303	91.0119	12.6258	-78.6108	352.028	97.6062	2.19303
JG-SCM15-84	873.181	38325.5	3.32663	21.2534	4.40544	0.0991203	4.59904	0.0152788	1.32034	0.287091		97.7487	1.28088	95.964	4.21131	51.8428	105.197	97.7487	1.28088
JG-SCM15-7	166.482	14384.4	0.406822	23.9445	14.6788	0.088499	16.3981	0.0153689	7.30966	0.445762		98.3207	7.13238	86.1041	13.5381	-240.774	372.388	98.3207	7.13238
JG-SCM15-98	195.143	9661.99	1.92645	19.9199	7.68122	0.106427	9.65919	0.0153758	5.85651	0.606315		98.3645	5.717	102.692	9.43433	204.286	178.452	98.3645	5.717
JG-SCM15-8	357.619	24982.3	2.44527	19.7976	5.608	0.107224	5.84858	0.0153958	1.66019	0.283862		98.4916	1.62272	103.423	5.75097	218.56	129.889	98.4916	1.62272
JG-SCM15-10	397.13	16154.9	1.73919	20.6389	5.1534	0.102942	5.24373	0.0154092	0.969152	0.184821		98.5763	0.948087	99.4887	4.96953	121.416	121.492	98.5763	0.948087
JG-SCM15-117	246.497	7703.8	1.35739	22.5881	13.1229	0.0946133	13.2082	0.0155	1.49917	0.113503		99.1529	1.47509	91.7918	11.5927	-95.572	323.304	99.1529	1.47509
JG-SCM15-13	147.726	9123.66	1.60937	24.1194	12.4725	0.0890867	13.2864	0.015584	4.57872	0.344617		99.6861	4.52924	86.6522	11.0358	-259.191	317.203	99.6861	4.52924
JG-SCM15-48	350.222	21942.7	0.35945	21.6302	7.53949	0.0995641	7.78475	0.0156193	1.93867	0.249034		99.9105	1.922	96.3739	7.15755	9.71141	181.616	99.9105	1.922
JG-SCM15-44	343.215	16687.2	0.558176	18.6049	7.5006	0.115981	7.69101	0.0156499	1.70078	0.221139		100.105	1.68941	111.422	8.11618	360.535	169.419	100.105	1.68941
JG-SCM15-46	88.698	2960.98	1.15116	20.405	29.3241	0.106038	30.0687	0.0156927	6.64973	0.221152		100.376	6.62305	102.335	29.279	148.186	700.719	100.376	6.62305
JG-SCM15-66	327.497	14862.6	2.42105	20.6552	8.20333	0.104827	8.39677	0.0157037	1.79194	0.213408		100.446	1.78598	101.223	8.08968	119.573	193.6	100.446	1.78598
JG-SCM15-61	273.457	11396.8	2.02694	22.0472	8.40406	0.0983705	8.60094	0.0157296	1.82974	0.212737		100.61	1.82662	95.271	7.82168	-36.4074	204.264	100.61	1.82662
JG-SCM15-83	581.735	19802	2.54604	21.1132	4.79491	0.103609	4.93415	0.0158655	1.16392	0.235891		101.472	1.17181	100.103	4.70359	67.6258	114.145	101.472	1.17181
JG-SCM15-15	158.365	13609.1	2.07947	24.4133	12.5845	0.0896358	12.8657	0.0158711	2.67538	0.207947		101.508	2.69446	87.1641	10.7468	-289.981	322.027	101.508	2.69446
JG-SCM15-91	1122.94	52236.4	2.50624	20.6768	2.01112	0.105948	2.21515	0.0158882	0.928598	0.419203		101.617	0.936216	102.252	2.15473	117.078	47.4043	101.617	0.936216
JG-SCM15-56	241.491	13563.6	1.48863	20.6679	6.00228	0.106227	6.57187	0.0159232	2.67621	0.407221		101.839	2.70401	102.508	6.4079	118.1	141.602	101.839	2.70401
JG-SCM15-69	997.397	35314.9	2.10884	21.0882	2.14971	0.104373	2.22718	0.0159633	0.582311	0.261456		102.094	0.589819	100.804	2.13726	70.4513	51.1415	102.094	0.589819
JG-SCM15-87	280.542	10112.7	0.978883	20.8948	12.2149	0.105579	12.4164	0.0159998	2.2279	0.179432		102.325	2.26169	101.913	12.0402	92.2957	290.257	102.325	2.26169
JG-SCM15-79	318.933	1350.89	0.630251	19.8383	14.4689	0.111428	14.6486	0.0160323	2.28737	0.156149		102.531	2.32672	107.271	14.9132	213.851	336.662	102.531	2.32672
JG-SCM15-49	60.8901	4124.85	0.988811	18.2387	30.6991	0.123456	31.1899	0.0163308	5.51137	0.176704		104.425	5.70886	118.201	34.8154	405.212	702.288	104.425	5.70886
JG-SCM15-123	116.058	11184.2	2.47386	19.5207	18.925	0.115979	19.5523	0.01642	4.91296	0.251272		104.991	5.11637	111.42	20.6354	251.07	438.851	104.991	5.11637
JG-SCM15-73	66.1777	4387.56	2.87397	21.7969	33.3503	0.10412	34.2712	0.0164599	7.89097	0.230251		105.243	8.23731	100.572	32.8266	-8.76604	825.204	105.243	8.23731
JG-SCM15-14	114.559	5982.5	1.53313	23.3404	17.1728	0.0972936	17.6076	0.0164699	3.88845	0.22084		105.307	4.06155	94.275	15.8535	-176.635	430.915	105.307	4.06155
JG-SCM15-39	377.664	27681.6	1.79897	20.438	3.19927	0.112244	3.30137	0.016638	0.814685	0.246772		106.373	0.859496	108.016	3.3829	144.376	75.0772	106.373	0.859496
JG-SCM15-54	71.5319	673.26	2.04921	20.2673	37.7758	0.113265	38.3356	0.0166491	6.52691	0.170257		106.444	6.89044	108.948	39.6233	164.025	912.379	106.444	6.89044
JG-SCM15-64	106.45	6110.85	2.93516	21.7052	24.1812	0.105824	24.5191	0.0166589	4.05647	0.165441		106.506	4.28488	102.138	23.8293	1.3739	590.092	106.506	4.28488
JG-SCM15-65	224.179	12919.6	7.54373	20.6032	8.67417	0.113444	9.13511	0.0169518	2.86513	0.313639		108.362	3.07877	109.111	9.45083	125.459	204.534	108.362	3.07877
JG-SCM15-63	423.253	36136.6	1.07205	19.8322	4.65076	0.11786	4.85787	0.0169526	1.40332	0.288876		108.368	1.50804	113.13	5.20066	214.559	107.767	108.368	1.50804
JG-SCM15-30	57.4524	4273.06	1.66515	18.5839	27.401	0.126632	27.6094	0.0170678	3.38651	0.122658		109.098	3.66352	121.067	31.5201	363.087	628.538	109.098	3.66352
JG-SCM15-40	281.363	13983.1	1.13004	20.7344	6.57686	0.116061	6.82299	0.0174533	1.81607	0.266168		111.541	2.00823	111.495	7.20463	110.507	155.391	111.541	2.00823
JG-SCM15-9	205.434	10523.1	2.60704	20.3707	7.55766	0.124982	9.28676	0.0184651	5.39681	0.58113		117.948	6.30755	119.578	10.4764	152.138	177.264	117.948	6.30755
JG-SCM15-19	853.882	34893.3	4.41224	20.7148	1.64219	0.123283	5.57497	0.0185218	5.32762	0.955632		118.307	6.24546	118.044	6.21288	112.754	38.7578	118.307	6.24546
JG-SCM15-112	113.758	7172.51	1.47983	21.303	20.5505	0.131827	21.0304	0.0203679	4.46711	0.212412		129.98	5.74822	125.738	24.8766	46.238	495.51	129.98	5.74822
JG-SCM15-26	675.292	36446.5	0.851028	20.2798	2.41604	0.142167	2.56681	0.0209104	0.866754	0.337677		133.407	1.14443	134.972	3.24411	162.579	56.5045	133.407	1.14443
JG-SCM15-94	476.318	32368.9	0.531189	20.31	3.1593	0.15782	3.24644	0.0232471	0.74713	0.230138		148.145	1.09422	148.793	4.49325	159.151	73.9342	148.145	1.09422
JG-SCM15-110	78.7668	4865.53	1.08874	28.8865	24.9822	0.112156	25.1879	0.0234973	3.21232	0.127534		149.721	4.75409	107.936	25.7973	-739.227	708.279	149.721	4.75409
JG-SCM15-35	310.807	16601.5	0.916278	20.8078	5.04233	0.156952	5.12611	0.0236859	0.923002	0.180059		150.909	1.37671	148.031	7.06115	102.161	119.28	150.909	1.37671
JG-SCM15-32	84.2961	6713.67	0.74779	20.8721	15.9135	0.156541	17.7081	0.023697	7.7678	0.438658		150.979	11.5915	147.671	24.3418	94.8724	378.833	150.979	11.5915
JG-SCM15-12	79.5815	5014.71	0.811319	23.6667	32.6623	0.139125	32.7965	0.0238804	2.96376	0.0903681		152.133	4.45607	132.264	40.6933	-211.379	839.199	152.133	4.45607
JG-SCM15-6	229.181	7558.27	1.53776	21.2286	7.54979	0.156338	7.69904	0.0240704	1.50858	0.195945		153.33	2.28582	147.492	10.5697	54.6196	180.32	153.33	2.28582
JG-SCM15-11	440.59	25759.3	1.02665	20.2555	3.42621	0.164147	4.39653	0.0241144	2.75509	0.626652		153.607	4.18198	154.327	6.29465	165.384	80.0813	153.607	4.18198
JG-SCM15-58	339.763	38173.2	2.09859	20.0015	3.71718	0.167332	3.9345	0.0242739	1.28952	0.327748		154.611	1.97002	157.101	5.72675	194.841	86.4401	154.611	1.97002
JG-SCM15-38	217.704	15326.4	0.393252	19.8493	9.42992	0.171012	9.83047	0.024619	2.77751	0.282541		156.782	4.30211	160.297	14.578	212.524	218.883	156.782	4.30211
JG-SCM15-97	62.6617	3574.18	1.86374	32.5222	44.331	0.107668	44.664	0.025396	5.44437	0.121896		161.669	8.69239	103.83	44.1101	-1083.83	1394.57	161.669	8.69239
JG-SCM15-2	176.087	15117	2.02537	23.6192	9.41586	0.151026	10.3863	0.0258711	4.38368	0.422064		164.655	7.12656	142.817	13.8383	-206.333	236.624	164.655	7.12656
JG-SCM15-59	130.768	5383.59	1.15439	22.3714	15.2718	0.159586	15.3852	0.0258933	1.86491	0.121214		164.794	3.03432	150.341	21.5026	-71.9559	375.027	164.794	3.03432
JG-SCM15-114	629.973	81940.8	1.07687	20.0817	2.72932	0.178027	2.78597	0.0259291	0.558925	0.200622		165.019	0.910628	166.362	4.27504	185.482	63.5595	165.019	0.910628
JG-SCM15-86	356.409	11769.5	0.517882	19.7278	3.50896	0.181849	3.73194	0.0260188	1.27065	0.340479		165.583	2.07718	169.65	5.83065	226.757	81.1118	165.583	2.07718
JG-SCM15-88	467.828	35303.7	1.13402	20.3709	3.66415	0.176177	3.72263	0.0260291	0.657211	0.176545		165.648	1.07479	164.765	5.66187	152.12	85.8698	165.648	1.07479
JG-SCM15-53	310.559	23350.8	0.460574	20.6574	3.90052	0.174626	3.98853	0.0261628	0.833216	0.208903		166.488	1.36944	163.426	6.02083	119.316	91.9648	166.488	1.36944
JG-SCM15-113	298.007	13958	0.427281	21.2941	4.64128	0.173989	4.80393	0.0268708	1.23946	0.258009		170.934	2.09081	162.875	7.22923	47.2532	110.909	170.934	2.09081
JG-SCM15-116	413.034	25345.3	0.677787	20.5891	2.44018	0.180303	2.66086	0.0269239	1.06099	0.398739		171.267	1.7932	168.321	4.12728	127.12	57.4395	171.267	1.7932
JG-SCM15-17	187.047	4855.92	1.18623	19.0162	18.4016	0.195662	19.1016	0.0269854	5.12383	0.26824		171.653	8.67915	181.449	31.7497	311.014	421.972	171.653	8.67915
JG-SCM15-109	163.114	18943.7	0.83304	19.8438	10.8484	0.19244	10.9662	0.0276961	1.60329	0.146202		176.113	2.78537	178.709	17.9718	213.167	251.954	176.113	2.78537
JG-SCM15-18	148.739	6228.82	0.933878	19.0104	9.21878	0.201099	12.1863	0.0277268	7.9699	0.654007		176.305	13.861	186.056	20.7201	311.701	210.197	176.305	13.861
JG-SCM15-67	99.3268	7346.38	1.19302	20.7531	12.8693	0.185078	13.1412	0.0278572	2.65946	0.202376		177.123	4.64641	172.421	20.8418	108.398	305.003	177.123	4.64641
JG-SCM15-107	142.766	11277	1.06894	21.0996	9.33588	0.184796	9.40795	0.0282791	1.16227	0.123542		179.769	2.06054	172.179	14.9006	69.1614	222.519	179.769	2.06054
JG-SCM15-93	448.745	9761.46	0.606503	19.0027	4.87445	0.206323	8.01429	0.0284356	6.36149	0.793769		180.75	11.3387	190.462	13.9189	312.624	110.969	180.75	11.3387
JG-SCM15-51	575.138	44963.7	1.27332	19.99	2.0253	0.197777	2.20478	0.0286739	0.871346	0.395207		182.243	1.56573	183.244	3.69656	196.182	47.0741	182.243	1.56573
JG-SCM15-16	751.22	52413.6	0.482797	19.8864	1.06184	0.201219	2.37971	0.0290217	2.12968	0.89493		184.423	3.87196	186.157	4.04765	208.194	24.6223	184.423	3.87196
JG-SCM15-60	117.304	9301.97	1.00785	20.2799	9.83286	0.206508	10.0248	0.0303739	1.95245	0.194762		192.888	3.71026	190.618	17.4244	162.576	230.37	192.888	3.71026
JG-SCM15-95	119.571	17993.3	1.06478	19.2557	6.94176	0.21952	7.65558	0.0306572	3.22797	0.42165		194.66	6.18966	201.51	13.9933	282.466	158.96	194.66	6.18966
JG-SCM15-68	469.358	68546.8	1.1899	20.1045	2.96057	0.213178	3.29073	0.0310838	1.43665	0.436575		197.328	2.79197	196.216	5.87144	182.842	68.9819	197.328	2.79197
JG-SCM15-43	1685.62	240037	1.88425	19.6947	0.807502	0.250241	0.922425	0.0357443	0.445881	0.483379		226.4	0.991953	226.772	1.87468	230.608	18.6516	226.4	0.991953
JG-SCM15-57	1003.14	60948.5	3.20442	19.6937	1.51526	0.251141	2.25587	0.035871	1.67121	0.740825		227.189	3.73067	227.502	4.59789	230.724	34.9931	227.189	3.73067
JG-SCM15-42	44.7105	21312.2	1.61589	13.4705	3.16875	1.87624	3.27695	0.183302	0.835152	0.254856		1084.99	8.33982	1072.73	21.7085	1047.92	63.8894	1047.92	63.8894
JG-SCM15-121	90.2667	66623.5	1.76127	13.3028	1.72429	1.88834	2.31994	0.182188	1.55207	0.669013		1078.92	15.4193	1077	15.4018	1073.13	34.6354	1073.13	34.6354
JG-SCM15-125	114.74	78826.7	6.84345	13.214	0.903193	1.92159	1.50251	0.184159	1.20074	0.799157		1089.66	12.0379	1088.62	10.0347	1086.55	18.1033	1086.55	18.1033
JG-SCM15-102	99.6675	76373.6	1.96664	13.0392	1.18039	1.97908	1.35222	0.187159	0.659672	0.487845		1105.97	6.70422	1108.41	9.12155	1113.17	23.5845	1113.17	23.5845
JG-SCM15-90	508.291	444872	2.98847	8.8442	0.157077	5.16543	0.468742	0.331332	0.44164	0.942182		1844.84	7.0854	1846.94	3.98758	1849.29	2.84087	1849.29	2.84087
JG-SCM15-52	437.404	309759	1.4643	6.20737	0.0635223	10.1225	0.776455	0.455717	0.773852	0.996648		2420.62	15.6169	2446.03	7.17528	2467.21	1.07011	2467.21	1.07011
LB-1 (JG-SCM13)
JG-SCM13-21	177.927	4664.71	1.19534	24.0066	14.329	0.0869014	14.5704	0.0151306	2.64122	0.181272		96.8074	2.53779	84.6127	11.8293	-247.314	363.929	96.8074	2.53779
JG-SCM13-22	49.8204	23470.6	1.47164	11.6373	1.54431	2.76598	2.08966	0.233454	1.40776	0.673681		1352.58	17.1762	1346.41	15.5851	1336.6	29.8587	1336.6	29.8587
JG-SCM13-23	178.8	14169	1.07686	19.5815	13.7572	0.117195	14.2927	0.0166439	3.87562	0.27116		106.41	4.0902	112.526	15.225	243.932	318.235	106.41	4.0902
JG-SCM13-24	79.4578	5885.11	0.956654	23.1815	13.1442	0.16075	13.4473	0.0270266	2.8389	0.211114		171.912	4.81592	151.359	18.9115	-159.63	327.885	171.912	4.81592
JG-SCM13-25	213.237	9583.48	1.95633	21.8975	4.54529	0.106825	4.73692	0.0169654	1.3337	0.281555		108.449	1.43429	103.057	4.64218	-19.8876	110.001	108.449	1.43429
JG-SCM13-26	94.8545	6967.18	0.59475	21.6359	16.1167	0.172542	17.0845	0.0270749	5.66835	0.331784		172.215	9.63251	161.622	25.5322	9.11229	389.932	172.215	9.63251
JG-SCM13-27	168.654	7075.59	1.79249	20.4603	20.5349	0.104117	20.8841	0.0154501	3.80304	0.182102		98.8365	3.73012	100.569	19.999	141.826	486.417	98.8365	3.73012
JG-SCM13-28	68.1721	3262.13	0.887899	23.0602	23.6366	0.142168	24.0698	0.0237773	4.54597	0.188866		151.485	6.80616	134.973	30.4301	-146.6	593.012	151.485	6.80616
JG-SCM13-29	318.433	10465.8	1.96688	23.2184	14.3272	0.103731	15.8966	0.0174679	6.88724	0.433252		111.633	7.62224	100.214	15.1709	-163.584	357.934	111.633	7.62224
JG-SCM13-30	949.081	1430.74	6.18857	18.8454	5.91021	0.114121	6.12561	0.015598	1.61012	0.262851		99.7751	1.59413	109.728	6.37114	331.503	134.13	99.7751	1.59413
JG-SCM13-31	513.75	22977.4	1.37707	21.4605	4.7424	0.0970189	5.05123	0.0151006	1.73912	0.344296		96.6174	1.66776	94.0208	4.53599	28.6136	113.725	96.6174	1.66776
JG-SCM13-32	55.2612	5763.36	0.582823	36.3166	27.0182	0.0909878	27.6594	0.0239655	5.92114	0.214073		152.669	8.93357	88.4232	23.4268	NA	NA	152.669	8.93357
JG-SCM13-33	333.581	3102.16	1.14173	26.8137	36.0115	0.0190337	36.3373	0.0037015	4.85494	0.133608		23.8174	1.15419	19.1448	6.89164	-535.217	992.348	23.8174	1.15419
JG-SCM13-34	184.667	6391	3.93355	21.4518	11.581	0.107018	11.7734	0.0166502	2.1197	0.180041		106.45	2.2379	103.234	11.5572	29.6345	278.355	106.45	2.2379
JG-SCM13-35	46.488	2526.79	1.71587	17.9005	33.622	0.145672	34.9662	0.0189121	9.60206	0.274609		120.777	11.4891	138.083	45.1731	446.956	767.17	120.777	11.4891
JG-SCM13-36	213.427	18692.4	1.00216	19.908	5.52314	0.166493	5.80022	0.0240393	1.77129	0.305384		153.134	2.68049	156.371	8.40616	205.678	128.228	153.134	2.68049
JG-SCM13-37	168.067	12822.5	0.840514	21.6265	16.9357	0.102698	17.0113	0.0161082	1.60197	0.0941708		103.013	1.63712	99.2641	16.0883	10.1311	409.905	103.013	1.63712
JG-SCM13-38	214.345	12578.4	1.65337	21.6942	10.5588	0.111661	10.6747	0.017569	1.56868	0.146954		112.273	1.74597	107.484	10.8876	2.61054	254.974	112.273	1.74597
JG-SCM13-39	94.4575	9870.11	2.32755	22.58	16.4514	0.136982	16.6062	0.022433	2.26175	0.136199		143.014	3.19901	130.352	20.3174	-94.6934	406.101	143.014	3.19901
JG-SCM13-40	285.777	42933.5	1.32823	18.6963	4.94133	0.309244	5.06438	0.0419331	1.10961	0.2191		264.804	2.87875	273.595	12.1467	349.491	111.765	264.804	2.87875
JG-SCM13-42	463.21	14688.9	2.47355	21.1863	4.34962	0.0956365	4.6393	0.0146953	1.61367	0.347826		94.0426	1.50652	92.7405	4.1119	59.3922	103.694	94.0426	1.50652
JG-SCM13-43	423.878	7945.84	1.83949	20.3768	22.4723	0.0289309	23.4439	0.00427559	6.67944	0.284911		27.5035	1.83317	28.959	6.69332	151.434	532.35	27.5035	1.83317
JG-SCM13-44	62.2279	6678.45	1.14102	25.1945	32.1938	0.136219	32.7787	0.024891	6.16493	0.188077		158.493	9.65185	129.67	39.9228	-370.99	853.106	158.493	9.65185
JG-SCM13-45	77.3953	7616.96	1.65405	20.8852	13.0206	0.262799	13.2373	0.0398071	2.38576	0.18023		251.637	5.8878	236.92	27.9789	93.366	309.476	251.637	5.8878
JG-SCM13-46	182.973	8949.78	1.36022	22.3076	9.22614	0.100057	9.79108	0.0161883	3.27773	0.334767		103.521	3.36603	96.8291	9.04283	-64.9862	225.548	103.521	3.36603
JG-SCM13-47	32.1567	1910.63	2.07806	15.9249	41.4237	0.180299	42.596	0.0208242	9.92443	0.23299		132.863	13.0509	168.317	66.1627	701.307	920.349	132.863	13.0509
JG-SCM13-48	413.967	12768.5	2.16689	20.9562	5.18215	0.10572	5.30243	0.0160683	1.12297	0.211784		102.76	1.14481	102.043	5.14779	85.3571	122.989	102.76	1.14481
JG-SCM13-49	125.922	933.113	1.28698	19.6003	13.2213	0.133068	13.9785	0.0189163	4.53825	0.32466		120.803	5.43131	126.851	16.6704	241.704	305.847	120.803	5.43131
JG-SCM13-50	73.8637	3621.67	0.722268	26.7148	23.7925	0.134141	24.222	0.0259904	4.54133	0.187488		165.405	7.41602	127.812	29.0973	-525.316	644.083	165.405	7.41602
JG-SCM13-51	41.4869	4438.36	1.12463	21.0231	31.8587	0.123217	33.2102	0.0187874	9.37743	0.282366		119.988	11.1477	117.984	37.0084	77.746	773.979	119.988	11.1477
JG-SCM13-52	492.66	25457.6	2.90924	20.5207	4.44992	0.107689	4.55804	0.0160274	0.986857	0.216509		102.5	1.00353	103.849	4.49949	134.905	104.626	102.5	1.00353
JG-SCM13-53	468.217	50686.1	2.17169	21.8241	5.90625	0.101981	6.16217	0.0161418	1.75743	0.285196		103.226	1.79968	98.603	5.79045	-11.777	142.778	103.226	1.79968
JG-SCM13-54	146.356	132370	2.24574	9.33939	0.381118	3.73274	1.70757	0.25284	1.6645	0.974774		1453.1	21.6547	1578.42	13.6757	1750.17	6.97738	1750.17	6.97738
JG-SCM13-55	142.994	5334.04	0.702488	23.2346	18.7928	0.0895391	18.9409	0.0150885	2.36348	0.124782		96.5402	2.26471	87.0739	15.8065	-165.315	471.11	96.5402	2.26471
JG-SCM13-56	471.375	19043.6	1.36547	21.4415	3.34335	0.0946984	3.66246	0.0147264	1.4952	0.40825		94.2403	1.39883	91.8708	3.21701	30.7545	80.1375	94.2403	1.39883
JG-SCM13-57	326.075	18321	0.879702	19.2884	3.75642	0.189019	4.16931	0.0264423	1.809	0.433885		168.243	3.00415	175.792	6.73003	278.588	86.0044	168.243	3.00415
JG-SCM13-58	151.065	6008.18	1.25957	21.2392	8.40043	0.167936	8.56825	0.0258691	1.68748	0.196946		164.642	2.74314	157.626	12.5103	53.4518	200.746	164.642	2.74314
JG-SCM13-59	529.151	26870.2	1.65848	20.7945	3.66113	0.10312	5.44387	0.0155522	4.02887	0.740075		99.4842	3.97732	99.6524	5.16728	103.668	86.5926	99.4842	3.97732
JG-SCM13-60	115.186	5213.9	0.562169	23.7704	11.2227	0.14953	11.4575	0.0257788	2.30797	0.201437		164.075	3.73902	141.496	15.1342	-222.372	283.154	164.075	3.73902
JG-SCM13-61	125.043	20626.1	1.21688	23.7977	20.0059	0.14226	20.2989	0.0245536	3.43689	0.169314		156.371	5.30963	135.054	25.6751	-225.261	507.972	156.371	5.30963
JG-SCM13-62	76.7743	8673.48	1.31866	21.7182	29.8066	0.107135	30.3027	0.0168754	5.46094	0.180213		107.878	5.84215	103.341	29.7829	-0.0416008	732.523	107.878	5.84215
JG-SCM13-63	562.796	16972.6	1.03658	21.6752	6.46814	0.087176	6.93365	0.0137043	2.49773	0.360233		87.7439	2.17676	84.8693	5.64538	4.72106	155.884	87.7439	2.17676
JG-SCM13-65	182.688	8351	1.35919	23.2373	17.204	0.090631	17.3491	0.0152743	2.23955	0.129087		97.72	2.17199	88.091	14.6398	-165.606	430.798	97.72	2.17199
JG-SCM13-66	292.967	3666.09	2.26456	30.5757	39.7587	0.0170908	40.7294	0.00378999	8.83894	0.217016		24.3857	2.15137	17.2071	6.94941	-901.174	1191.21	24.3857	2.15137
JG-SCM13-67	194.074	9861.39	1.90971	26.2791	17.0292	0.0759737	17.1657	0.0144801	2.16096	0.125888		92.6755	1.98836	74.3525	12.3076	-481.504	454.271	92.6755	1.98836
JG-SCM13-68	80.6131	12243.6	1.56944	20.1508	7.17371	0.292758	7.4743	0.0427858	2.09834	0.28074		270.077	5.55006	260.728	17.1883	177.484	167.458	270.077	5.55006
JG-SCM13-69	128.967	6420.49	2.36612	22.851	22.5362	0.0929513	22.7325	0.0154049	2.98133	0.131148		98.5492	2.91574	90.2489	19.633	-124.054	562.323	98.5492	2.91574
JG-SCM13-70	779.976	21021	1.83929	20.7365	1.83922	0.0975913	1.98794	0.0146773	0.754428	0.379503		93.9283	0.703484	94.5505	1.79475	110.299	43.4496	93.9283	0.703484
JG-SCM13-71	424.325	17845.5	1.31477	20.1261	5.51481	0.0967125	5.60967	0.0141169	1.0273	0.183129		90.3672	0.921862	93.7372	5.02297	180.347	128.626	90.3672	0.921862
JG-SCM13-72	237.587	13416.3	1.9368	18.2743	9.15592	0.111572	9.38684	0.0147875	2.06926	0.220443		94.6282	1.94381	107.402	9.5671	400.853	205.49	94.6282	1.94381
JG-SCM13-73	476.449	43527.7	0.920742	20.6407	3.17207	0.0955268	4.16973	0.0143004	2.70641	0.64906		91.5334	2.45976	92.6388	3.69184	121.201	74.7552	91.5334	2.45976
JG-SCM13-74	468.919	24642.5	1.44652	21.5067	4.32533	0.125678	4.38725	0.0196034	0.734526	0.167423		125.149	0.910387	120.207	4.9736	23.4838	103.837	125.149	0.910387
JG-SCM13-75	175.897	14460.5	1.088	21.1989	8.77967	0.176598	8.91334	0.0271517	1.53786	0.172534		172.697	2.62057	165.129	13.5848	57.9385	209.642	172.697	2.62057
JG-SCM13-76	65.0509	12352.7	1.46604	20.7291	13.3658	0.263151	14.3427	0.0395626	5.20281	0.362749		250.121	12.7641	237.203	30.3488	111.096	316.699	250.121	12.7641
JG-SCM13-77	92.8871	8514.76	1.67244	18.7937	14.4016	0.105185	16.5419	0.0143372	8.13803	0.491965		91.7672	7.41515	101.551	15.9871	337.712	327.741	91.7672	7.41515
JG-SCM13-78	135.338	7235.31	1.75027	24.8704	15.7496	0.10901	16.5042	0.0196629	4.93327	0.29891		125.525	6.13259	105.059	16.4738	-337.526	407.648	125.525	6.13259
JG-SCM13-79	1544.16	88599.4	1.82783	20.6681	0.820642	0.112674	1.32498	0.0168897	1.04025	0.785104		107.969	1.11379	108.409	1.36237	118.093	19.357	107.969	1.11379
JG-SCM13-80	180.238	7101.26	1.57403	22.9434	12.8532	0.0882966	13.0599	0.0146927	2.31449	0.177221		94.0259	2.16042	85.9153	10.7593	-134.028	319.002	94.0259	2.16042
JG-SCM13-81	246.149	10182.6	1.58401	21.603	11.5803	0.0895721	11.7614	0.0140341	2.05567	0.174782		89.8407	1.83402	87.1047	9.81787	12.7703	279.249	89.8407	1.83402
JG-SCM13-82	305.026	9303.99	1.85284	19.1974	7.86435	0.10999	7.9677	0.0153142	1.27918	0.160546		97.9731	1.24378	105.956	8.01686	289.391	179.939	97.9731	1.24378
JG-SCM13-83	236.443	12223.1	1.30606	20.099	4.75124	0.111488	4.94119	0.0162519	1.35685	0.2746		103.924	1.39879	107.326	5.03257	183.477	110.701	103.924	1.39879
JG-SCM13-84	125.824	1685.17	0.565592	20.9345	26.8913	0.10548	28.0143	0.0160151	7.85224	0.280295		102.422	7.97888	101.822	27.1475	87.8173	647.712	102.422	7.97888
JG-SCM13-85	322.99	29044.8	1.89853	21.0153	6.14683	0.106601	6.58722	0.0162479	2.3681	0.3595		103.899	2.44071	102.851	6.44329	78.6287	146.078	103.899	2.44071
JG-SCM13-86	74.3447	3605.57	2.03815	23.9174	39.2344	0.102482	39.8084	0.017777	6.73549	0.169198		113.591	7.58392	99.0646	37.5905	-237.912	1024.43	113.591	7.58392
JG-SCM13-87	215.372	73397.9	0.483584	18.0987	1.63119	0.540733	1.69683	0.0709787	0.467413	0.275462		442.049	1.99694	438.908	6.04686	422.442	36.4283	442.049	1.99694
JG-SCM13-88	441.384	20008.5	1.74694	21.9684	4.10913	0.0975693	4.22939	0.0155457	1.00139	0.23677		99.4432	0.988175	94.5302	3.81761	-27.7227	99.6036	99.4432	0.988175
JG-SCM13-89	92.6249	4329.22	1.45408	25.274	33.2405	0.0838483	33.6186	0.0153698	5.02802	0.14956		98.3261	4.90634	81.7565	26.414	-379.163	883.639	98.3261	4.90634
JG-SCM13-90	234.503	13859.1	1.62806	20.8837	7.77634	0.121125	8.3957	0.0183459	3.16486	0.376962		117.193	3.6755	116.091	9.21039	93.58	184.406	117.193	3.6755
JG-SCM13-91	171.675	13088	1.48363	20.5436	6.16266	0.202115	6.49842	0.0301144	2.06181	0.317279		191.264	3.88558	186.914	11.0945	132.306	145.022	191.264	3.88558
JG-SCM13-92	481.238	37096.4	1.14169	20.6386	4.93886	0.0940599	5.08477	0.0140794	1.20938	0.237844		90.1286	1.08241	91.2783	4.43882	121.432	116.423	90.1286	1.08241
JG-SCM13-93	288.949	26840.4	2.51824	21.1758	8.21435	0.104371	8.42109	0.0160295	1.85448	0.220219		102.513	1.88605	100.803	8.08112	60.5506	196.025	102.513	1.88605
JG-SCM13-94	118.506	16406.1	0.656527	20.2086	9.74816	0.214223	10.8834	0.031398	4.83951	0.44467		199.292	9.49718	197.09	19.499	170.795	228.033	199.292	9.49718
JG-SCM13-94	137.758	9932.23	1.04801	19.5505	13.3095	0.174181	13.5524	0.0246977	2.55478	0.18851		157.278	3.96947	163.041	20.4161	247.596	307.599	157.278	3.96947
JG-SCM13-96	410.172	27232.6	2.60971	20.0922	4.98483	0.143093	5.04078	0.0208519	0.748989	0.148586		133.038	0.986226	135.795	6.40725	184.272	116.14	133.038	0.986226
JG-SCM13-97	107.608	9510.74	1.21616	19.8569	12.3017	0.129999	12.5879	0.0187219	2.6691	0.212037		119.573	3.1621	124.097	14.7053	211.638	286.002	119.573	3.1621
JG-SCM13-98	519.916	27555	2.7158	20.9886	5.05094	0.104685	5.44024	0.0159355	2.02094	0.371481		101.917	2.04349	101.091	5.23475	81.65	119.938	101.917	2.04349
JG-SCM13-99	269.358	36283.2	0.829584	20.0119	3.01347	0.182276	6.08656	0.0264556	5.28822	0.868835		168.327	8.78629	170.017	9.52853	193.628	70.0984	168.327	8.78629
JG-SCM13-100	1203.47	4125.15	4.44728	19.4471	5.87869	0.120956	7.53976	0.0170601	4.72113	0.626164		109.049	5.10503	115.938	8.26106	259.75	135.123	109.049	5.10503
JG-SCM13-101	519.83	239150	4.43395	16.9119	0.531631	0.745444	0.887803	0.0914337	0.711029	0.800886		564.01	3.83985	565.577	3.84997	571.892	11.5443	564.01	3.83985
JG-SCM13-101	312.029	15309.7	2.3461	20.3729	7.1039	0.105948	7.301	0.0156547	1.68497	0.230787		100.135	1.67421	102.252	7.10195	151.868	166.613	100.135	1.67421
JG-SCM13-102	222.146	3935.93	1.11278	19.5845	7.04786	0.122273	7.20169	0.0173676	1.48058	0.205587		110.998	1.62934	117.13	7.96717	243.597	162.552	110.998	1.62934
JG-SCM13-103	470.241	17805.7	1.39278	20.463	9.80397	0.0957521	10.1098	0.0142107	2.46805	0.244123		90.9635	2.22926	92.8476	8.97061	141.531	230.582	90.9635	2.22926
JG-SCM13-104	184.42	7064.43	2.80082	22.6529	11.2501	0.101589	13.7867	0.0166905	7.96924	0.578036		106.706	8.43364	98.2421	12.9105	-102.604	277.274	106.706	8.43364
JG-SCM13-105	175.865	20155.1	1.36038	19.7016	6.47464	0.281959	6.67339	0.0402889	1.61653	0.242236		254.624	4.03585	252.211	14.9046	229.806	149.679	254.624	4.03585
JG-SCM13-106	71.2095	3716.29	1.71288	17.2226	27.3331	0.158348	27.6703	0.0197792	4.30683	0.155648		126.26	5.38491	149.256	38.4259	532.171	609.045	126.26	5.38491
JG-SCM13-107	53.337	2091.21	2.82353	28.3847	39.2605	0.090453	39.8558	0.0186211	6.86247	0.172182		118.936	8.08709	87.9253	33.5812	-690.415	1123.51	118.936	8.08709
JG-SCM13-108	292.553	10055.7	1.75605	21.4632	8.65462	0.0917229	8.95192	0.0142781	2.28788	0.255575		91.3917	2.07619	89.107	7.63694	28.3151	207.818	91.3917	2.07619
JG-SCM13-109	104.385	1607.79	1.24739	5.14825	270.583	0.116903	271.087	0.00436498	16.5236	0.0609532		28.0773	4.62929	112.26	296.23	2778.4	151.789	28.0773	4.62929
JG-SCM13-110	411.984	14297.1	0.77417	20.4944	3.64436	0.17362	3.76049	0.0258068	0.927312	0.246593		164.251	1.50388	162.556	5.64874	137.942	85.6386	164.251	1.50388
JG-SCM13-111	684.695	813.315	1.12503	17.6647	9.306	0.141216	10.0467	0.0180922	3.78619	0.376858		115.587	4.33735	134.127	12.6239	476.363	206.178	115.587	4.33735
JG-SCM13-112	636.603	8520.32	1.71042	20.0322	3.30909	0.169214	3.4171	0.0245846	0.852352	0.249438		156.566	1.31842	158.737	5.0215	191.28	76.9867	156.566	1.31842
JG-SCM13-112	83.7307	2904.37	2.14536	29.7578	21.8303	0.0829505	22.6019	0.0179027	5.85503	0.259051		114.387	6.63835	80.9151	17.5804	-823.202	628.332	114.387	6.63835
JG-SCM13-114	35.3058	2075.53	0.848721	19.2458	29.4294	0.188846	30.8628	0.0263599	9.29624	0.301212		167.726	15.3911	175.644	49.8191	283.644	686.43	167.726	15.3911
JG-SCM13-115	118.909	14952.7	0.535681	19.3605	12.7861	0.112601	13.4201	0.015811	4.07609	0.30373		101.127	4.08988	108.342	13.7917	269.987	294.217	101.127	4.08988
JG-SCM13-116	283.733	20802.4	1.52761	20.2085	5.7914	0.134411	6.00389	0.0197	1.58319	0.263694		125.759	1.97171	128.053	7.22326	170.816	135.331	125.759	1.97171
JG-SCM13-117	78.8542	35601.7	1.9035	9.61985	0.710776	4.2573	0.834109	0.29703	0.436503	0.523317		1676.57	6.44401	1685.15	6.85853	1695.83	13.1	1695.83	13.1
JG-SCM13-118	161.324	11009.1	1.23103	21.0279	14.2407	0.0988217	14.5038	0.0150712	2.74969	0.189585		96.4304	2.63181	95.6881	13.2453	77.2042	339.743	96.4304	2.63181
JG-SCM13-119	204.468	20685	2.18033	21.4621	13.248	0.102974	13.4874	0.0160288	2.53004	0.187586		102.509	2.57301	99.5181	12.7863	28.4544	318.776	102.509	2.57301
JG-SCM13-120	446.651	21254.5	0.774128	20.5091	5.49187	0.106333	5.56812	0.0158166	0.918325	0.164925		101.162	0.921746	102.605	5.43405	136.229	129.109	101.162	0.921746
CR-1 (SG-11)
SG-11-16	782.358	6195.12	1.42278	31.8765	50.32	0.0161014	50.5158	0.00372249	4.44358	0.0879641		23.9522	1.06236	16.2189	8.12818	-1023.67	1583.06	23.9522	1.06236
SG-11-96	268.525	1226.69	1.12002	9.67241	184.948	0.0537826	185.793	0.0037729	17.708	0.0953099		24.2759	4.29068	53.192	96.5734	1685.78	304.77	24.2759	4.29068
SG-11-71	658.028	23903.2	1.23569	21.5635	5.95661	0.0831555	6.42827	0.0130049	2.41689	0.375979		83.2948	2.0002	81.1073	5.01104	17.1227	143.198	83.2948	2.0002
SG-11-66	866.279	20161.2	1.69418	21.2945	5.47372	0.0851982	5.68541	0.0131582	1.53697	0.270336		84.2699	1.28678	83.0204	4.53227	47.2337	130.827	84.2699	1.28678
SG-11-62	196.469	204.825	4.75687	23.5399	19.4987	0.0802475	20.1093	0.0137005	4.91778	0.244553		87.7193	4.28463	78.3776	15.1694	-197.911	492.209	87.7193	4.28463
SG-11-8	840.457	11395.6	1.79779	20.6084	9.37955	0.0918108	9.46477	0.0137226	1.26727	0.133893		87.8603	1.10587	89.1888	8.08157	124.865	221.255	87.8603	1.10587
SG-11-72	422.182	4809.71	1.52324	22.3155	13.3636	0.0853343	13.5201	0.0138111	2.05123	0.151717		88.4228	1.80137	83.1477	10.7941	-65.8407	327.401	88.4228	1.80137
SG-11-29	651.919	23984.6	1.36631	20.8292	8.87665	0.0916293	9.38492	0.0138422	3.0466	0.324627		88.6209	2.68145	89.02	7.99887	99.7104	210.316	88.6209	2.68145
SG-11-61	498.238	7964.49	2.25941	20.0614	9.9508	0.0957385	10.6467	0.0139298	3.78589	0.355594		89.1777	3.35293	92.835	9.44573	187.847	232.068	89.1777	3.35293
SG-11-10	851.689	24901.1	1.99181	20.2549	5.29962	0.0953963	5.46908	0.0140139	1.35089	0.247004		89.7125	1.20352	92.5179	4.83624	165.454	123.925	89.7125	1.20352
SG-11-2	295.933	5246.65	2.24856	21.6149	16.4884	0.0911278	17.235	0.0142857	5.0178	0.29114		91.4401	4.5559	88.5535	14.6166	11.441	398.853	91.4401	4.5559
SG-11-34	570.477	33381.5	1.99628	21.3229	9.1996	0.0946309	10.6302	0.0146345	5.32621	0.501045		93.6562	4.95227	91.8081	9.33144	44.0224	220.281	93.6562	4.95227
SG-11-94	849.498	12957.2	2.6653	21.1499	7.17161	0.0957019	7.55225	0.0146801	2.36735	0.313464		93.9459	2.20791	92.8011	6.69793	63.4906	170.985	93.9459	2.20791
SG-11-7	469.709	9956.48	2.76847	22.4734	7.95069	0.0905839	8.22814	0.0147645	2.11868	0.257492		94.4823	1.98718	88.0472	6.93953	-83.0859	194.972	94.4823	1.98718
SG-11-68	1011.69	26010.6	3.10458	20.1528	4.37399	0.101045	4.66447	0.0147689	1.62034	0.34738		94.5101	1.52022	97.7401	4.34653	177.249	102.063	94.5101	1.52022
SG-11-101	2729.16	91440.2	2.96372	20.7346	1.60322	0.0985781	2.51997	0.0148243	1.9442	0.771517		94.8623	1.83081	95.4629	2.29602	110.488	37.8473	94.8623	1.83081
SG-11-45	956.005	22409.4	2.67322	20.2501	6.08071	0.101284	6.44949	0.0148754	2.14963	0.333303		95.1865	2.03113	97.961	6.02285	166.005	142.22	95.1865	2.03113
SG-11-12	861.833	20447.6	2.55948	21.1957	5.75015	0.0987567	6.59121	0.0151815	3.22177	0.488799		97.1306	3.10587	95.6281	6.01541	58.3373	137.179	97.1306	3.10587
SG-11-31	313.648	9370.58	2.54809	21.3299	16.5625	0.0982216	17.3431	0.0151948	5.14469	0.296642		97.2151	4.96389	95.1334	15.751	43.2265	398.274	97.2151	4.96389
SG-11-24	777.591	16605.7	2.02794	21.3592	4.01319	0.0981053	5.3858	0.0151976	3.59182	0.666905		97.2332	3.46623	95.0258	4.88576	39.9899	96.0386	97.2332	3.46623
SG-11-82	437.946	8016.31	1.86477	19.9987	12.8716	0.105045	13.3359	0.0152362	3.48802	0.261552		97.4784	3.37449	101.423	12.8727	195.162	300.238	97.4784	3.37449
SG-11-83	289.783	20636.7	2.51874	20.7125	10.5112	0.101654	11.9508	0.0152706	5.68648	0.475823		97.6968	5.51363	98.3024	11.1976	113.037	248.605	97.6968	5.51363
SG-11-39	554.499	3615.25	2.15272	19.9215	13.9104	0.105959	15.1358	0.0153094	5.96592	0.394161		97.9431	5.79905	102.262	14.7253	204.109	324.136	97.9431	5.79905
SG-11-81	717.194	15233.1	4.0738	22.4205	10.4424	0.0945199	10.7287	0.0153697	2.46164	0.229446		98.3259	2.40207	91.7051	9.40777	-77.3123	256.019	98.3259	2.40207
SG-11-84	416.299	5649.05	1.80401	20.0982	8.33727	0.105756	8.82827	0.0154157	2.90315	0.328847		98.6177	2.84123	102.076	8.5736	183.574	194.462	98.6177	2.84123
SG-11-6	607.987	10617.8	3.42715	21.5462	5.62621	0.0992815	6.08944	0.0155145	2.32961	0.382565		99.245	2.29431	96.1129	5.58433	19.095	135.205	99.245	2.29431
SG-11-58	790.178	39522.9	3.57215	21.587	8.71241	0.0996858	9.00556	0.0156072	2.27908	0.253074		99.8331	2.25775	96.4863	8.28925	14.5512	209.74	99.8331	2.25775
SG-11-18	522.913	7620.28	2.78363	21.8519	9.08791	0.0988488	10.1769	0.0156661	4.58033	0.450071		100.207	4.55432	95.7131	9.2959	-14.8537	220.051	100.207	4.55432
SG-11-102	979.797	24139.7	3.77467	21.6185	3.86558	0.100014	4.09597	0.0156813	1.35435	0.330654		100.304	1.34795	96.7888	3.78137	10.997	92.9887	100.304	1.34795
SG-11-9	475.983	6897.15	2.92737	23.2188	11.3619	0.093387	11.5063	0.0157262	1.81707	0.157919		100.589	1.81358	90.6536	9.97911	-163.621	283.409	100.589	1.81358
SG-11-75	587.088	20824	3.1325	22.034	10.4416	0.0990101	10.5897	0.0158224	1.76525	0.166695		101.199	1.77247	95.8622	9.68736	-34.9533	253.928	101.199	1.77247
SG-11-32	1000.47	16216.4	2.93061	20.049	5.65924	0.10931	5.78863	0.0158946	1.21702	0.210243		101.658	1.22749	105.334	5.79185	189.284	131.77	101.658	1.22749
SG-11-51	152.661	9445.58	3.33726	20.4452	40.971	0.107403	41.1703	0.015926	4.04612	0.0982775		101.857	4.08887	103.587	40.5655	143.575	999.426	101.857	4.08887
SG-11-55	815.086	6204.99	3.19156	20.0678	6.86977	0.109465	7.93086	0.0159321	3.96294	0.499686		101.896	4.00631	105.476	7.9455	187.1	160.082	101.896	4.00631
SG-11-1	419.216	22934.3	2.93441	20.4592	11.2715	0.107934	11.6132	0.0160158	2.79645	0.240798		102.426	2.84167	104.074	11.4881	141.963	265.258	102.426	2.84167
SG-11-60	234.486	2942.7	2.1752	24.1228	26.3225	0.0919218	26.7215	0.0160822	4.60014	0.172151		102.848	4.69359	89.2921	22.845	-259.542	677.12	102.848	4.69359
SG-11-14	566.526	12177.5	2.47888	21.7335	6.558	0.102985	6.7633	0.0162331	1.65373	0.244515		103.805	1.7029	99.5279	6.41206	-1.73539	158.264	103.805	1.7029
SG-11-40	1514.53	28685.9	2.85465	20.2047	3.05486	0.110873	3.30657	0.0162472	1.26538	0.382687		103.895	1.30413	106.764	3.35098	171.244	71.3304	103.895	1.30413
SG-11-49	153.091	11515.6	1.9155	21.1005	25.4294	0.106256	27.4119	0.0162609	10.2351	0.373383		103.982	10.5573	102.535	26.7403	69.037	613.573	103.982	10.5573
SG-11-48	266.92	4836.9	2.46278	28.1537	23.244	0.0802304	23.4322	0.0163822	2.96436	0.126508		104.751	3.0801	78.3615	17.673	-667.822	647.946	104.751	3.0801
SG-11-13	341.454	7010.75	2.61754	21.1335	4.99647	0.107042	6.09016	0.0164068	3.48215	0.571766		104.907	3.62346	103.256	5.97934	65.309	119	104.907	3.62346
SG-11-76	313.684	9201.44	3.12512	20.5178	12.9745	0.111472	13.7787	0.0165881	4.63823	0.336624		106.056	4.8789	107.311	14.0324	135.239	305.989	106.056	4.8789
SG-11-64	572.405	15689.4	2.52321	21.4822	7.35284	0.10651	7.74062	0.0165946	2.41928	0.312543		106.098	2.54579	102.768	7.56567	26.2217	176.554	106.098	2.54579
SG-11-21	328.238	7964.42	1.34078	25.3722	10.9959	0.090288	11.8046	0.0166145	4.29425	0.363777		106.224	4.52415	87.7716	9.92624	-389.248	286.854	106.224	4.52415
SG-11-38	623.962	17016.3	3.68964	21.6661	8.23535	0.105934	9.57337	0.0166461	4.88143	0.509897		106.425	5.1524	102.239	9.31135	5.72934	198.557	106.425	5.1524
SG-11-86	766.096	24687.2	4.29151	20.8857	5.29206	0.110813	6.03952	0.0167857	2.91031	0.481878		107.309	3.09718	106.709	6.11768	93.299	125.4	107.309	3.09718
SG-11-90	502.411	14294.6	2.07409	19.1371	8.46477	0.121276	9.45831	0.0168326	4.21987	0.446155		107.607	4.50319	116.228	10.3878	296.573	193.466	107.607	4.50319
SG-11-80	267.943	6930.71	2.46735	23.4788	23.2034	0.0990758	24.8194	0.016871	8.80945	0.354941		107.85	9.42199	95.9229	22.7214	-191.398	586.964	107.85	9.42199
SG-11-97	200.163	5793.15	1.49787	19.3242	17.4161	0.121891	17.9102	0.0170834	4.17806	0.233278		109.196	4.52386	116.785	19.7609	274.29	401.697	109.196	4.52386
SG-11-100	250.898	8774.19	1.45232	21.9363	18.5546	0.107559	19.1197	0.0171124	4.61422	0.241333		109.38	5.00448	103.73	18.8557	-24.1823	452.58	109.38	5.00448
SG-11-69	323.066	5287.13	3.9983	20.7358	17.8027	0.114143	18.2018	0.017166	3.79078	0.208264		109.72	4.12405	109.748	18.9367	110.348	423.165	109.72	4.12405
SG-11-33	1858.71	1201.77	0.906965	20.1078	5.41108	0.11857	6.2215	0.0172917	3.07039	0.493513		110.517	3.36437	113.775	6.69643	182.464	126.119	110.517	3.36437
SG-11-87	352.815	6953.37	1.38398	24.5858	12.2942	0.0976385	12.7171	0.0174102	3.25254	0.255761		111.267	3.58797	94.5942	11.4868	-307.974	315.675	111.267	3.58797
SG-11-53	307.794	9646.27	8.90076	22.0501	14.2713	0.108905	14.565	0.0174163	2.91053	0.19983		111.306	3.2118	104.963	14.5253	-36.7181	347.904	111.306	3.2118
SG-11-3	325.525	9229.13	1.45583	23.0654	15.201	0.104704	17.2733	0.0175156	8.20346	0.47492		111.935	9.10331	101.11	16.6251	-147.162	378.739	111.935	9.10331
SG-11-5	213.301	4463.61	3.8876	20.9683	19.6609	0.116284	20.0468	0.0176841	3.91477	0.195281		113.003	4.38524	111.698	21.2072	83.9456	470.366	113.003	4.38524
SG-11-67	183.791	13181.4	2.15531	20.1941	13.7752	0.12182	14.4037	0.017842	4.20829	0.292168		114.003	4.7554	116.721	15.8831	172.472	322.827	114.003	4.7554
SG-11-52	317.074	8758.3	3.59656	18.0176	14.0922	0.142297	14.6753	0.0185949	4.09536	0.279065		118.769	4.81949	135.088	18.5644	432.45	315.345	118.769	4.81949
SG-11-22	819.173	57309.2	3.4224	20.4882	3.84925	0.129052	4.07581	0.0191764	1.33996	0.328759		122.449	1.62528	123.246	4.7304	138.662	90.4322	122.449	1.62528
SG-11-95	363.473	19892.5	3.12987	21.0854	10.3745	0.12886	10.5428	0.0197059	1.87674	0.17801		125.797	2.338	123.072	12.2204	70.7397	247.302	125.797	2.338
SG-11-50	1516.59	10443	1.29835	20.3446	3.48165	0.145128	4.24303	0.0214141	2.42516	0.571564		136.587	3.2776	137.601	5.46018	155.158	81.5416	136.587	3.2776
SG-11-44	197.544	12876.5	1.78826	19.074	16.4004	0.157372	16.6413	0.0217705	2.82129	0.169535		138.836	3.87509	148.4	22.9798	304.076	375.972	138.836	3.87509
SG-11-73	103.285	3921.04	4.72837	22.6249	30.9514	0.136179	31.2236	0.0223458	4.11394	0.131758		142.464	5.79662	129.635	38.0171	-99.5682	776.354	142.464	5.79662
SG-11-28	278.779	9434.1	0.982501	22.3431	11.2901	0.13816	11.5316	0.0223885	2.34779	0.203596		142.734	3.31426	131.404	14.2143	-68.8666	276.47	142.734	3.31426
SG-11-70	103.156	2753.35	4.32664	19.2566	21.1371	0.161054	22.8543	0.0224931	8.69141	0.380297		143.393	12.3253	151.625	32.2004	282.356	488.373	143.393	12.3253
SG-11-56	57.3875	1813.02	0.975622	20.0008	53.2422	0.15536	53.5688	0.0225364	5.9068	0.110266		143.666	8.39221	146.633	73.2682	194.922	1327.95	143.666	8.39221
SG-11-89	593.36	25707.9	2.3023	20.3041	5.06081	0.155139	5.35573	0.0228456	1.75272	0.32726		145.615	2.52361	146.439	7.30369	159.826	118.471	145.615	2.52361
SG-11-35	337.093	5804.82	1.44107	20.4569	15.7512	0.155354	17.119	0.0230494	6.70522	0.391684		146.899	9.73856	146.628	23.3771	142.244	371.663	146.899	9.73856
SG-11-98	954.01	27924	1.29061	20.98	3.88118	0.152454	4.10974	0.0231976	1.35147	0.328844		147.833	1.97518	144.076	5.5203	82.6193	92.1137	147.833	1.97518
SG-11-47	709.445	11477.5	1.04505	20.2303	7.87511	0.159353	8.63123	0.023381	3.5328	0.409305		148.988	5.20311	150.137	12.0467	168.287	184.167	148.988	5.20311
SG-11-23	435.097	16037.9	1.74906	21.474	9.51364	0.153119	9.58907	0.0238474	1.20038	0.125182		151.926	1.80237	144.662	12.9296	27.1066	228.567	151.926	1.80237
SG-11-4	330.351	15331.3	1.23016	21.3868	8.31885	0.154686	8.87988	0.0239936	3.10629	0.349812		152.847	4.69201	146.041	12.0794	36.8484	199.393	152.847	4.69201
SG-11-27	81.5045	4140.48	2.34161	20.7225	35.8051	0.161983	36.3123	0.024345	6.04819	0.16656		155.058	9.26632	152.438	51.4429	111.882	869.913	155.058	9.26632
SG-11-19	234.285	12636.8	1.82332	20.1304	9.79384	0.171874	9.95011	0.0250936	1.75653	0.176533		159.767	2.77187	161.044	14.819	179.839	228.725	159.767	2.77187
SG-11-103	1000.4	39544.2	0.669256	20.5185	2.29615	0.169002	2.51038	0.0251499	1.01475	0.404221		160.121	1.60482	158.552	3.68509	135.179	53.968	160.121	1.60482
SG-11-93	649.373	30959.6	2.08852	19.6652	3.20895	0.180117	3.48283	0.0256893	1.3538	0.388706		163.513	2.18579	168.161	5.39755	234.112	74.0974	163.513	2.18579
SG-11-88	493.681	38297.6	1.71178	20.8599	7.5856	0.172492	8.07712	0.0260964	2.77463	0.343517		166.071	4.549	161.58	12.0661	96.2289	179.782	166.071	4.549
SG-11-17	309.748	13915.5	0.992045	20.7489	16.7902	0.173785	16.9458	0.026152	2.29087	0.135188		166.42	3.76368	162.698	25.4803	108.86	398.925	166.42	3.76368
SG-11-15	134.193	2308.7	1.38872	16.5771	20.0063	0.218666	20.2302	0.0262898	3.00186	0.148385		167.286	4.95709	200.799	36.8739	615.209	436.061	167.286	4.95709
SG-11-36	574.647	26951.8	1.51777	20.6437	5.04619	0.177855	5.47463	0.0266288	2.1231	0.387807		169.415	3.54999	166.213	8.394	120.856	118.978	169.415	3.54999
SG-11-46	462.863	2041.58	1.31392	18.7711	27.3911	0.197265	28.1303	0.0268559	6.40645	0.227742		170.84	10.801	182.809	47.095	340.475	630.798	170.84	10.801
SG-11-25	958.663	119592	1.16746	20.0062	3.02383	0.193158	3.88393	0.0280269	2.43748	0.627582		178.188	4.28382	179.32	6.38442	194.297	70.3214	178.188	4.28382
SG-11-91	797.36	23173.8	1.73804	20.0319	4.17686	0.194904	4.99111	0.0283166	2.73223	0.54742		180.004	4.85009	180.805	8.26656	191.315	97.1925	180.004	4.85009
SG-11-59	310.638	5304.87	1.0981	18.3868	6.59622	0.213848	8.14289	0.0285175	4.77457	0.586349		181.263	8.53401	196.777	14.5673	387.076	148.272	181.263	8.53401
SG-11-43	647.774	55029.7	1.97774	19.8711	4.45055	0.198346	4.79379	0.0285853	1.78129	0.371583		181.688	3.19121	183.725	8.05672	209.982	103.211	181.688	3.19121
SG-11-92	88.2589	3510.05	1.09635	25.1222	33.9268	0.166113	35.8993	0.0302664	11.7359	0.326911		192.215	22.2252	156.04	51.9706	-363.541	899.971	192.215	22.2252
SG-11-79	123.549	5689.96	0.729679	20.1283	26.7335	0.20795	28.2443	0.0303574	9.11371	0.322674		192.785	17.3098	191.831	49.4098	180.083	633.017	192.785	17.3098
SG-11-54	196.781	8955.47	2.14093	20.8377	11.0536	0.205877	11.2691	0.031114	2.19315	0.194617		197.517	4.26615	190.087	19.5378	98.763	262.191	197.517	4.26615
SG-11-37	1040.36	42919.8	3.03747	19.3495	1.40308	0.259244	1.7974	0.0363812	1.12338	0.625005		230.363	2.54216	234.057	3.75728	271.295	32.1541	230.363	2.54216
SG-11-26	140.275	6531.56	1.49928	20.7565	10.4067	0.256784	10.8138	0.0386564	2.93932	0.271812		244.499	7.05204	232.072	22.4381	108.025	246.348	244.499	7.05204
SG-11-85	239.915	20577.3	1.82486	17.2879	4.28467	0.60429	4.78613	0.0757682	2.13275	0.445612		470.814	9.68339	479.953	18.3073	523.833	94.0081	470.814	9.68339
SG-11-42	79.1611	44061.4	1.81101	13.3961	2.57496	1.90763	2.75982	0.185341	0.993088	0.359838		1096.09	10.01	1083.76	18.3871	1059.08	51.8357	1059.08	51.8357
SG-11-74	161.984	41852.9	3.69132	11.8278	0.931819	2.19549	2.771	0.188336	2.60962	0.941763		1112.35	26.662	1179.61	19.3336	1305.15	18.0964	1305.15	18.0964
SG-11-63	94.6578	39289.9	2.36002	11.5402	1.48699	2.79556	2.07236	0.233981	1.44344	0.696522		1355.33	17.6437	1354.35	15.4996	1352.79	28.6867	1352.79	28.6867
SG-11-65	154.755	51175	3.82186	10.9406	0.8236	3.17616	1.70518	0.252025	1.49309	0.875621		1448.91	19.3748	1451.38	13.1689	1454.98	15.6669	1454.98	15.6669
SG-11-30	199.318	212003	1.93166	9.39018	0.602981	4.52828	1.56074	0.308394	1.43956	0.922355		1732.8	21.8734	1736.18	12.9816	1740.24	11.0511	1740.24	11.0511
SG-11-11	184.181	26731.4	2.49579	9.27059	1.96009	4.81382	7.67388	0.323665	7.41933	0.966829		1807.6	116.963	1787.32	64.6039	1763.7	35.824	1763.7	35.824
CR-2 (SG-17)
SG-17-78	411.786	6266.87	0.869669	19.187	31.275	0.0292215	32.1684	0.00406638	7.52859	0.234037		26.1604	1.96552	29.2458	9.27396	290.598	730.515	26.1604	1.96552
SG-17-39	723.714	4447.37	1.2178	23.2619	29.5721	0.024313	30.0578	0.00410188	5.38141	0.179036		26.3884	1.41716	24.3917	7.24437	-168.245	750.235	26.3884	1.41716
SG-17-96	392.401	4780.52	2.08955	19.9292	32.4427	0.0307172	33.0194	0.00443987	6.14425	0.18608		28.5579	1.75078	30.7203	9.99207	203.232	771.058	28.5579	1.75078
SG-17-22	589.887	5427.45	1.18195	19.789	12.4024	0.0924338	12.5068	0.0132664	1.61306	0.128974		84.9586	1.36144	89.7681	10.7456	219.609	287.923	84.9586	1.36144
SG-17-88	258.664	9940.46	0.802092	21.8498	27.7684	0.0861181	28.8482	0.0136471	7.8189	0.271036		87.3802	6.78608	83.8808	23.2296	-14.6239	682.49	87.3802	6.78608
SG-17-12	217.336	5992.25	1.33235	25.5127	29.8497	0.0745378	30.096	0.0137922	3.84219	0.127664		88.3024	3.36961	72.9965	21.201	-403.64	793.659	88.3024	3.36961
SG-17-34	238.868	11020	1.46911	18.6777	21.6083	0.103531	21.8796	0.0140246	3.4352	0.157004		89.7804	3.06276	100.03	20.8457	351.755	493.386	89.7804	3.06276
SG-17-32	560.028	9459.41	1.3985	21.2878	7.31661	0.0909612	7.63548	0.0140438	2.1835	0.285968		89.9023	1.94939	88.3984	6.46426	47.9944	174.959	89.9023	1.94939
SG-17-43	281.246	6247.55	2.75179	24.3868	27.9513	0.0802878	28.1265	0.0142005	3.13418	0.111432		90.8984	2.82893	78.4155	21.2285	-287.221	724.356	90.8984	2.82893
SG-17-46	326.856	8734.57	1.76576	20.6094	20.5009	0.0952035	20.8081	0.0142304	3.56222	0.171194		91.0885	3.22196	92.3391	18.3682	124.752	487.134	91.0885	3.22196
SG-17-62	585.801	20501.6	2.23609	20.6709	3.40275	0.0966384	3.8	0.014488	1.69154	0.445143		92.7252	1.55726	93.6686	3.40018	117.769	80.269	92.7252	1.55726
SG-17-28	421.936	9817.99	1.75172	20.7685	10.3326	0.0971306	10.4222	0.0146305	1.36388	0.130863		93.6311	1.26779	94.1242	9.36912	106.662	244.647	93.6311	1.26779
SG-17-26	397.482	11288.4	2.59649	22.5888	20.7973	0.0895997	20.95	0.0146791	2.52468	0.12051		93.9396	2.35447	87.1304	17.4943	-95.6466	515.244	93.9396	2.35447
SG-17-54	134.981	2688.03	0.744486	19.0312	35.1476	0.10806	35.9365	0.0149152	7.48858	0.208383		95.4394	7.09441	104.189	35.5995	309.192	823.403	95.4394	7.09441
SG-17-8	165.813	5856.79	0.396422	19.9936	23.1483	0.103276	23.6696	0.0149758	4.93997	0.208706		95.8247	4.69871	99.7963	22.5013	195.759	544.334	95.8247	4.69871
SG-17-95	200.706	12093.4	0.559961	19.8453	14.3907	0.104177	14.8564	0.0149943	3.69086	0.248435		95.9423	3.51487	100.625	14.2333	212.991	334.874	95.9423	3.51487
SG-17-55	95.9417	2913.66	1.27176	16.3297	55.5367	0.12671	56.4349	0.0150067	10.0287	0.177704		96.021	9.5583	121.137	64.5298	647.632	1295.38	96.021	9.5583
SG-17-69	921.207	21824.6	3.30598	21.083	4.99171	0.0994457	5.16042	0.0152061	1.30874	0.253611		97.2868	1.26367	96.2645	4.73947	70.9878	118.783	97.2868	1.26367
SG-17-66	388.599	18272.7	2.83501	21.4237	16.4919	0.0981059	16.6232	0.0152436	2.0858	0.125475		97.5251	2.01887	95.0264	15.0809	32.7367	397.338	97.5251	2.01887
SG-17-53	1214.81	35678.7	2.18859	21.3057	5.48678	0.0987279	5.59421	0.0152558	1.09109	0.195039		97.6024	1.05691	95.6014	5.10413	45.9399	131.171	97.6024	1.05691
SG-17-56	770.082	22432.1	1.31601	20.6186	8.17989	0.10227	8.89682	0.0152934	3.49896	0.393282		97.8416	3.39759	98.8693	8.38173	123.701	192.918	97.8416	3.39759
SG-17-27	465.813	24810.1	2.68719	22.04	5.38161	0.0957213	5.59312	0.015301	1.52355	0.272397		97.8893	1.48013	92.8191	4.9613	-35.6096	130.66	97.8893	1.48013
SG-17-90	1320.89	36512.8	2.49556	21.3506	4.01215	0.0991059	4.22211	0.0153464	1.31485	0.311421		98.1781	1.28112	95.9507	3.86564	40.9545	95.9834	98.1781	1.28112
SG-17-17	441.023	13707.8	2.61915	19.7379	9.56749	0.107467	9.69073	0.0153842	1.54057	0.158974		98.418	1.50469	103.646	9.5487	225.592	221.574	98.418	1.50469
SG-17-38	106.586	2874.42	0.610743	1.1631	2291.52	1.82441	2291.54	0.01539	9.2085	0.00401848		98.4548	8.99733	1054.27	#NUM!	NA	NA	98.4548	8.99733
SG-17-71	486.428	16124.7	2.52289	21.5613	5.23346	0.0985013	5.67014	0.0154034	2.18206	0.384834		98.5395	2.13384	95.3919	5.1626	17.3634	125.783	98.5395	2.13384
SG-17-35	227.128	4188.59	1.32205	22.4766	37.8411	0.0945122	38.0576	0.015407	4.05371	0.106515		98.5624	3.96505	91.6981	33.3807	-83.4344	956.766	98.5624	3.96505
SG-17-84	967.628	27657.9	3.11867	20.8427	4.69828	0.102944	4.87474	0.0155616	1.29972	0.266623		99.544	1.28385	99.4902	4.6199	98.2184	111.215	99.544	1.28385
SG-17-100	369.561	18592.7	3.11432	18.6755	7.52185	0.114934	8.13449	0.0155675	3.09705	0.380731		99.5815	3.06039	110.469	8.5147	352.014	170.198	99.5815	3.06039
SG-17-80	281.855	7940.51	1.51028	22.7016	17.0993	0.094599	17.6437	0.0155755	4.34913	0.246498		99.6321	4.29981	91.7786	15.484	-107.885	423.374	99.6321	4.29981
SG-17-11	420.808	12231.1	2.4071	21.2619	15.4981	0.101015	15.764	0.0155771	2.88335	0.182907		99.6421	2.85094	97.7126	14.6865	50.8542	371.869	99.6421	2.85094
SG-17-63	224.18	10707.6	2.17757	18.782	15.286	0.114476	16.1675	0.015594	5.26557	0.325689		99.7497	5.21196	110.052	16.8639	339.116	347.993	99.7497	5.21196
SG-17-72	636.498	38221.2	3.28307	20.7549	5.30468	0.103972	5.46349	0.0156508	1.30771	0.239355		100.11	1.29904	100.437	5.22473	108.204	125.365	100.11	1.29904
SG-17-94	417.103	53397.3	2.96222	20.2838	10.6348	0.106401	10.9651	0.0156528	2.67099	0.243591		100.123	2.65361	102.668	10.7075	162.148	249.268	100.123	2.65361
SG-17-20	326.031	11494.3	2.11436	23.0364	16.5906	0.0941301	16.866	0.0157268	3.03572	0.17999		100.593	3.03001	91.3435	14.7344	-144.039	413.517	100.593	3.03001
SG-17-14	758.755	30346	2.27412	21.0571	7.76046	0.103047	8.08521	0.0157374	2.26847	0.28057		100.66	2.2657	99.5853	7.66959	73.9526	184.697	100.66	2.2657
SG-17-44	132.711	8495.17	0.539364	27.4844	74.0087	0.0811893	74.2396	0.0161839	5.84999	0.0787988		103.493	6.00599	79.2625	56.6647	-601.931	2335.98	103.493	6.00599
SG-17-64	302.909	60818.8	1.56961	20.9454	10.4765	0.106683	10.7993	0.0162062	2.62059	0.242663		103.634	2.69412	102.926	10.5709	86.5839	249.001	103.634	2.69412
SG-17-87	113.264	2900.76	1.48913	16.3175	113.421	0.138052	113.61	0.0163378	6.54313	0.057593		104.469	6.78048	131.307	140.831	649.212	647.744	104.469	6.78048
SG-17-48	314.528	20530	2.20183	20.3353	13.2897	0.111167	13.3877	0.0163956	1.61656	0.12075		104.836	1.68102	107.033	13.6006	156.211	312.272	104.836	1.68102
SG-17-89	384.176	105354	1.97358	21.3023	12.2402	0.106248	12.5128	0.0164152	2.59751	0.207588		104.96	2.70427	102.527	12.2032	46.3367	293.381	104.96	2.70427
SG-17-21	1545.2	70705.9	8.54128	20.7068	2.15882	0.109626	3.12587	0.0164636	2.26065	0.723208		105.267	2.3604	105.623	3.13574	113.652	50.936	105.267	2.3604
SG-17-6	2286.04	90040.4	1.84833	20.7502	1.35675	0.111302	1.59164	0.0167503	0.832197	0.522855		107.085	0.883797	107.156	1.61862	108.714	32.0663	107.085	0.883797
SG-17-57	166.121	8648.49	2.02747	20.9441	24.4332	0.111437	25.2053	0.0169273	6.19089	0.245618		108.207	6.64309	107.279	25.666	86.7357	586.956	108.207	6.64309
SG-17-5	175.722	6121.1	2.47947	19.8201	29.2278	0.123777	29.6772	0.0177928	5.14485	0.17336		113.691	5.79797	118.491	33.2023	215.981	689.835	113.691	5.79797
SG-17-23	632.572	22088.3	2.8963	20.7211	3.62771	0.119295	3.90497	0.0179281	1.44517	0.370084		114.548	1.6408	114.433	4.22599	112.033	85.6328	114.548	1.6408
SG-17-86	130.425	5447.23	1.28753	22.8864	41.8586	0.108079	42.0519	0.0179398	4.02707	0.0957643		114.622	4.57511	104.207	41.6706	-127.875	1075.61	114.622	4.57511
SG-17-79	826.237	22480.4	3.85103	21.4844	4.17793	0.115843	4.28728	0.0180506	0.962102	0.224409		115.324	1.09967	111.296	4.5194	25.9832	100.249	115.324	1.09967
SG-17-58	1278.38	44108.7	1.98603	20.7608	2.60791	0.12074	2.834	0.0181799	1.10922	0.391397		116.143	1.27674	115.742	3.10011	107.54	61.6075	116.143	1.27674
SG-17-29	304.333	9615.31	2.66735	21.5514	10.0888	0.118915	11.0635	0.0185871	4.54069	0.410419		118.72	5.34137	114.088	11.9394	18.5116	242.83	118.72	5.34137
SG-17-83	293.817	11966.5	1.43721	22.7165	16.8049	0.116947	16.916	0.0192676	1.9361	0.114454		123.026	2.35932	112.3	17.9858	-109.498	416.115	123.026	2.35932
SG-17-49	486.729	15551.8	1.49173	21.2246	6.61107	0.126686	6.8195	0.0195015	1.67311	0.245343		124.505	2.06312	121.116	7.78604	55.0648	157.831	124.505	2.06312
SG-17-40	158.445	5469.2	1.17844	19.936	12.6926	0.14159	13.363	0.0204725	4.17935	0.312756		130.641	5.40501	134.459	16.8305	202.416	295.646	130.641	5.40501
SG-17-76	131.649	9259.73	0.780382	24.6531	39.8971	0.128035	39.9501	0.0228928	2.05614	0.0514678		145.913	2.96647	122.33	46.0735	-314.982	1058.87	145.913	2.96647
SG-17-50	179.995	20496.1	0.714299	21.6097	20.3509	0.14654	20.4317	0.022967	1.81531	0.0888476		146.38	2.6273	138.852	26.5216	11.9716	493.767	146.38	2.6273
SG-17-75	133.931	3565.5	0.807599	23.9538	37.4806	0.134242	37.7467	0.0233217	4.47381	0.118522		148.615	6.57272	127.902	45.392	-241.757	976.266	148.615	6.57272
SG-17-65	280.944	26479.8	3.30265	21.2299	14.4119	0.151497	14.5037	0.0233265	1.62901	0.112316		148.645	2.39373	143.232	19.3777	54.4851	345.331	148.645	2.39373
SG-17-10	892.728	70288.8	1.54389	20.4531	3.73985	0.1574	4.00237	0.0233487	1.42564	0.3562		148.785	2.09685	148.425	5.52679	142.686	87.7928	148.785	2.09685
SG-17-61	80.3891	3326.05	0.660437	22.7675	73.8961	0.142509	74.5521	0.0235318	9.86813	0.132366		149.938	14.6254	135.276	94.6951	-115.023	2131.56	149.938	14.6254
SG-17-24	110.259	4261.38	0.983798	21.1929	24.8737	0.153744	25.4777	0.0236312	5.51454	0.216446		150.565	8.20675	145.212	34.4861	58.6531	600.971	150.565	8.20675
SG-17-60	282.103	26792.9	1.38745	19.7554	6.78422	0.166407	7.17659	0.0238426	2.34046	0.326124		151.896	3.51351	156.296	10.3964	223.542	157.028	151.896	3.51351
SG-17-41	583.223	23554.3	0.562261	19.9904	3.49437	0.172001	3.68483	0.0249374	1.16931	0.317332		158.785	1.83401	161.154	5.49103	196.125	81.2263	158.785	1.83401
SG-17-52	68.4037	2393.67	0.653348	16.3308	52.2928	0.210928	52.8291	0.0249829	7.50826	0.142124		159.071	11.7973	194.331	93.7023	647.478	1206.54	159.071	11.7973
SG-17-81	218.274	9917.7	0.700513	21.1922	12.508	0.165341	12.6756	0.0254129	2.05444	0.162078		161.775	3.28223	155.368	18.2631	58.7368	299.142	161.775	3.28223
SG-17-91	198.014	10838.2	0.845068	20.7987	11.5106	0.168815	11.5967	0.0254651	1.41035	0.121616		162.103	2.25772	158.39	17.0087	103.213	272.868	162.103	2.25772
SG-17-9	474.563	30775.4	0.533118	19.921	6.33101	0.177022	6.43643	0.0255764	1.16016	0.180248		162.803	1.86511	165.495	9.82952	204.16	147.022	162.803	1.86511
SG-17-19	56.6324	2830.46	0.677533	19.5656	57.143	0.181368	57.5381	0.0257368	6.73131	0.116989		163.811	10.8877	169.237	89.928	245.78	1431.21	163.811	10.8877
SG-17-30	302.202	12124.4	0.827554	20.256	8.79589	0.177434	8.95541	0.0260669	1.68279	0.187907		165.885	2.75589	165.85	13.7038	165.328	205.883	165.885	2.75589
SG-17-93	771.47	26100.8	0.997205	20.4913	2.23437	0.175431	2.46597	0.0260719	1.04336	0.423102		165.917	1.70902	164.121	3.73704	138.272	52.4849	165.917	1.70902
SG-17-2	186.531	7414.56	0.645534	21.3167	12.6062	0.168847	13.0256	0.0261044	3.27896	0.251731		166.121	5.37745	158.418	19.108	44.7387	302.297	166.121	5.37745
SG-17-15	778.785	20851.3	1.21488	19.8268	4.17283	0.181795	4.30485	0.0261416	1.05795	0.245758		166.355	1.73744	169.604	6.7241	215.178	96.667	166.355	1.73744
SG-17-98	566.73	26478.5	4.01466	19.8059	5.63985	0.183084	5.91905	0.0262993	1.79646	0.303505		167.345	2.96761	170.711	9.30099	217.595	130.628	167.345	2.96761
SG-17-97	117.787	6659.17	0.843099	18.9146	25.0718	0.191925	26.2822	0.0263286	7.88393	0.299972		167.529	13.0378	178.271	42.9966	323.212	577.502	167.529	13.0378
SG-17-59	305.561	10233.7	0.760075	18.9457	5.52871	0.191972	5.77057	0.0263783	1.65311	0.286472		167.841	2.73879	178.311	9.43698	319.482	125.714	167.841	2.73879
SG-17-68	241.106	11495.7	0.898185	21.2254	11.3386	0.171816	11.637	0.0264495	2.61808	0.22498		168.289	4.34892	160.994	17.3267	54.9743	271.212	168.289	4.34892
SG-17-82	825.333	100979	1.28027	19.6438	5.61991	0.185892	5.78027	0.026484	1.35208	0.233912		168.505	2.2488	173.118	9.20037	236.586	129.724	168.505	2.2488
SG-17-18	331.441	16850	1.2304	20.311	7.25429	0.182967	7.42067	0.0269528	1.56257	0.21057		171.448	2.6437	170.611	11.6545	159.035	169.925	171.448	2.6437
SG-17-85	389.8	19898.7	1.25115	19.8732	9.73484	0.190212	9.79988	0.0274161	1.12718	0.11502		174.356	1.93897	176.81	15.9038	209.755	226.105	174.356	1.93897
SG-17-33	478.721	6741.77	1.37786	20.5076	5.50818	0.186731	6.1258	0.0277734	2.68057	0.437587		176.598	4.66958	173.836	9.78746	136.399	129.479	176.598	4.66958
SG-17-70	123.221	5352.63	1.19763	16.4374	20.6944	0.236017	20.904	0.0281368	2.95256	0.141244		178.877	5.20885	215.154	40.5516	633.491	449.963	178.877	5.20885
SG-17-7	124.54	7170.22	1.15268	18.7773	24.7525	0.20748	25.0611	0.028256	3.92088	0.156452		179.624	6.94561	191.436	43.7518	339.727	568.287	179.624	6.94561
SG-17-67	147.06	8273.1	1.23202	18.3399	14.2842	0.214803	14.5287	0.0285717	2.65412	0.182681		181.603	4.7527	197.575	26.0907	392.808	321.931	181.603	4.7527
SG-17-77	270.711	8183.17	0.949663	19.8463	10.6292	0.211294	10.7418	0.0304135	1.55144	0.144431		193.135	2.95195	194.638	19.0281	212.869	246.852	193.135	2.95195
SG-17-74	94.2079	9436.28	1.98645	22.5522	20.6004	0.232403	21.7181	0.0380128	6.87749	0.31667		240.504	16.2359	212.181	41.6087	-91.6675	509.886	240.504	16.2359
SG-17-31	65.9592	5891.32	2.09143	26.4435	30.0751	0.198287	30.6029	0.0380287	5.65878	0.18491		240.602	13.3642	183.676	51.4633	-498.069	815.415	240.602	13.3642
SG-17-51	95.5373	10784.2	1.29529	17.3531	25.1059	0.30671	25.3595	0.0386015	3.57755	0.141073		244.159	8.57155	271.628	60.5107	515.568	559.438	244.159	8.57155
SG-17-99	59.0254	4774.12	2.97211	17.493	27.2499	0.310001	28.0602	0.0393302	6.69463	0.238581		248.68	16.3312	274.181	67.523	497.908	610.632	248.68	16.3312
SG-17-92	173.629	8765.28	1.88401	19.1191	10.0413	0.284871	10.1574	0.0395016	1.53103	0.150731		249.743	3.75053	254.514	22.8703	298.684	229.569	249.743	3.75053
SG-17-13	79.6925	9303.66	1.11459	18.5773	12.408	0.293479	13.8892	0.0395421	6.2412	0.449356		249.994	15.304	261.294	32.0088	363.882	280.715	249.994	15.304
SG-17-16	359.178	28659.8	1.18312	19.798	5.48332	0.275594	5.56423	0.0395721	0.945435	0.169913		250.18	2.31998	247.156	12.2071	218.536	126.981	250.18	2.31998
SG-17-47	307.19	21545.7	1.5214	19.8208	3.41335	0.295007	3.67754	0.0424085	1.3687	0.372177		267.744	3.58955	262.493	8.50663	215.87	79.0453	267.744	3.58955
SG-17-25	314.354	3179.04	1.93033	18.2296	5.44868	0.321648	5.50117	0.0425261	0.75814	0.137814		268.472	1.99359	283.169	13.5949	406.336	122.042	268.472	1.99359
SG-17-36	206.043	16681.6	1.35699	20.2218	10.9717	0.292734	11.1792	0.0429331	2.14384	0.191771		270.988	5.68913	260.709	25.7096	169.271	256.869	270.988	5.68913
SG-17-73	244.234	31419.8	2.03293	19.4975	6.24775	0.308176	6.47892	0.043579	1.71521	0.264736		274.979	4.61728	272.766	15.4988	253.815	143.796	274.979	4.61728
SG-17-45	186.682	20814.1	2.04436	18.1545	5.40352	0.591729	5.5571	0.0779122	1.29745	0.233477		483.649	6.0455	471.971	20.9794	415.563	120.8	483.649	6.0455
SG-17-1	161.035	97180.5	1.64432	9.60677	1.01042	4.33479	1.4199	0.302026	0.99758	0.702571		1701.35	14.9173	1700	11.7154	1698.34	18.6177	1698.34	18.6177
SG-17-37	882.556	982825	3.98895	9.54055	0.197417	3.99202	1.00122	0.276226	0.981564	0.980368		1572.33	13.6954	1632.57	8.12989	1711.07	3.63199	1711.07	3.63199
CR-3 (SG-13)
SG-13-10	167.703	1346.05	0.850941	23.8078	178.138	0.0228875	178.729	0.003952	14.5334	0.0813148		25.426	3.68798	22.9776	40.6283	-226.331	0	25.426	3.68798
SG-13-99	750.569	5373.92	2.2122	28.2855	20.7243	0.0202622	21.2268	0.0041567	4.59118	0.216292		26.7403	1.22515	20.3682	4.28047	-680.726	578	26.7403	1.22515
SG-13-36	488.66	2734.29	1.27552	29.4614	38.075	0.0237659	39.5891	0.00507817	10.8439	0.273912		32.6531	3.53192	23.8492	9.33192	-794.748	1111.67	32.6531	3.53192
SG-13-54	544.395	18909.5	1.87091	21.994	9.6714	0.0741798	9.97168	0.0118328	2.42865	0.243554		75.8316	1.83089	72.6581	6.9922	-30.5469	234.933	75.8316	1.83089
SG-13-3	710.787	11977.9	1.61145	21.2893	10.9325	0.0829053	11.2641	0.012801	2.71312	0.240864		81.9966	2.21058	80.8727	8.75649	47.7804	261.787	81.9966	2.21058
SG-13-89	449.949	8072.86	2.36078	21.4258	11.108	0.0869771	11.3429	0.0135158	2.29628	0.202443		86.5448	1.97403	84.6835	9.21616	32.5313	266.784	86.5448	1.97403
SG-13-85	728.339	17904.6	2.38754	20.7407	4.78396	0.0906207	5.02678	0.0136317	1.54346	0.307048		87.2819	1.33808	88.0814	4.24108	109.784	112.997	87.2819	1.33808
SG-13-104	358.958	8196.44	2.69195	22.6977	12.0398	0.0851902	12.2248	0.0140239	2.11859	0.173303		89.776	1.8888	83.0129	9.74468	-107.464	297.137	89.776	1.8888
SG-13-35	588.679	14256.5	2.23037	22.6827	8.72515	0.0864491	9.0636	0.0142218	2.4537	0.27072		91.0337	2.21799	84.1902	7.323	-105.84	214.957	91.0337	2.21799
SG-13-60	631.715	13563.4	1.639	19.9711	5.23932	0.0985562	5.3775	0.0142753	1.21121	0.225237		91.3739	1.09893	95.4427	4.89864	198.325	121.801	91.3739	1.09893
SG-13-1	618.062	30410.5	2.19744	21.1035	10.1808	0.0935139	10.5079	0.014313	2.60117	0.247546		91.6133	2.36617	90.7715	9.12447	68.674	242.751	91.6133	2.36617
SG-13-47	1099.26	21435.3	1.77275	21.0593	3.60186	0.0937987	3.98473	0.0143265	1.70429	0.427706		91.6991	1.55176	91.0359	3.46968	73.6707	85.6277	91.6991	1.55176
SG-13-15	484.313	22914.7	2.20395	19.6095	8.05042	0.102913	8.67303	0.0146364	3.22679	0.372049		93.6685	3.00063	99.4616	8.21748	240.627	185.812	93.6685	3.00063
SG-13-80	589.497	15011.1	2.94336	21.1404	11.2094	0.0954665	11.5098	0.0146374	2.61247	0.226978		93.6748	2.42953	92.583	10.1851	64.5333	267.634	93.6748	2.42953
SG-13-33	954.216	47323.3	2.81644	20.4152	3.20423	0.0993374	3.99898	0.0147084	2.39264	0.598313		94.1257	2.23573	96.1646	3.66913	147.049	75.1536	94.1257	2.23573
SG-13-18	135.185	3574.36	1.65128	28.7158	35.9285	0.071028	37.2203	0.0147927	9.72056	0.261163		94.6616	9.13441	69.6745	25.0684	-722.658	1029.42	94.6616	9.13441
SG-13-83	615.053	16215.2	2.04253	21.4479	7.86405	0.0952302	8.15876	0.0148135	2.17306	0.266347		94.7934	2.04485	92.3639	7.20329	30.0389	188.721	94.7934	2.04485
SG-13-40	670.138	17124.7	2.63514	20.6866	4.02819	0.0991997	5.12485	0.0148833	3.16824	0.618212		95.2369	2.99516	96.0374	4.69622	115.978	95.0149	95.2369	2.99516
SG-13-72	267.855	8200.95	2.07014	23.811	16.7484	0.0864723	17.0652	0.0149332	3.27294	0.19179		95.5539	3.10436	84.2118	13.792	-226.666	424.292	95.5539	3.10436
SG-13-6	351.649	8674.13	1.65355	23.2697	18.6036	0.0885361	18.6568	0.014942	1.40801	0.0754692		95.6101	1.33627	86.1388	15.4091	-169.076	466.655	95.6101	1.33627
SG-13-25	630.753	14678.4	2.34457	20.6713	3.78846	0.0999781	4.39796	0.014989	2.23375	0.507906		95.9081	2.12649	96.7561	4.05886	117.69	89.3372	95.9081	2.12649
SG-13-5	320.874	22863.1	2.32901	21.8602	12.7956	0.094709	12.9917	0.0150157	2.24857	0.173078		96.0777	2.14436	91.8806	11.4132	-15.7718	310.411	96.0777	2.14436
SG-13-43	561.111	14549.9	2.20815	20.7309	10.8261	0.0999996	11.2502	0.0150354	3.05961	0.271962		96.2031	2.92159	96.776	10.3851	110.928	256.189	96.2031	2.92159
SG-13-30	874.819	26476.7	1.43245	22.0718	7.64368	0.0940185	7.89011	0.0150505	1.95651	0.247971		96.2986	1.87009	91.2399	6.88507	-39.1112	185.829	96.2986	1.87009
SG-13-76	414.268	13688.9	3.0586	19.3891	9.29492	0.107211	9.88959	0.0150763	3.37762	0.341533		96.4629	3.2339	103.411	9.72365	266.647	213.636	96.4629	3.2339
SG-13-81	254.145	5851.18	3.87142	22.1073	14.1174	0.094157	15.1729	0.0150969	5.56027	0.36646		96.5934	5.33082	91.3684	13.2586	-43.0184	344.513	96.5934	5.33082
SG-13-95	427.264	9771.07	2.58188	20.5722	7.92123	0.101576	9.11508	0.0151555	4.50986	0.494769		96.9657	4.3403	98.2298	8.53447	129.046	186.618	96.9657	4.3403
SG-13-69	561.002	13060.2	1.10651	22.3096	5.27715	0.0938155	5.42247	0.0151798	1.24694	0.229958		97.12	1.20195	91.0514	4.72237	-65.2056	128.859	97.12	1.20195
SG-13-77	144.442	4613.51	2.3017	34.8788	38.1578	0.0607001	39.5451	0.015355	10.3826	0.262551		98.2324	10.1218	59.8357	22.9823	-1300.37	1246.54	98.2324	10.1218
SG-13-68	806.37	25882.8	2.28497	19.9119	6.21248	0.106844	6.70758	0.0154298	2.52918	0.377062		98.7072	2.47746	103.074	6.57453	205.227	144.241	98.7072	2.47746
SG-13-64	503.263	16510.1	2.41877	19.9916	8.6384	0.106574	8.79032	0.0154525	1.62722	0.185115		98.8514	1.59626	102.827	8.59641	195.995	201.053	98.8514	1.59626
SG-13-92	514.386	19891.4	3.53966	19.2163	6.12652	0.111353	6.35498	0.0155192	1.68865	0.265721		99.2746	1.66356	107.202	6.46544	287.111	140.14	99.2746	1.66356
SG-13-67	461.133	10587.8	2.13103	22.1127	7.58528	0.0969083	8.5493	0.0155418	3.94386	0.461308		99.4184	3.89084	93.9184	7.66936	-43.6118	184.565	99.4184	3.89084
SG-13-46	461.076	4862.97	2.68594	20.1341	7.46873	0.106676	7.66984	0.0155775	1.74483	0.227492		99.6451	1.72527	102.92	7.50708	179.417	174.283	99.6451	1.72527
SG-13-12	302.676	9091.11	2.54707	21.0113	19.5608	0.102273	19.8273	0.0155851	3.24041	0.163431		99.6933	3.20563	98.872	18.6816	79.0881	468.355	99.6933	3.20563
SG-13-20	164.055	3450.62	0.657214	26.44	16.9821	0.0816886	18.4705	0.0156647	7.26415	0.393285		100.198	7.22229	79.7313	14.1643	-497.723	454.519	100.198	7.22229
SG-13-55	1790.2	58708.1	44.2929	20.8945	2.40258	0.103952	2.83919	0.015753	1.51282	0.532835		100.759	1.51245	100.418	2.71462	92.345	56.943	100.759	1.51245
SG-13-88	168.747	2196.09	2.728	26.9806	30.7394	0.0805268	31.2158	0.0157576	5.43288	0.174043		100.788	5.43312	78.6401	23.6259	-551.882	843.456	100.788	5.43312
SG-13-87	640.169	25475.2	3.98799	21.6299	9.3852	0.100638	9.84213	0.0157876	2.96402	0.301157		100.978	2.9697	97.3651	9.13794	9.72955	226.22	100.978	2.9697
SG-13-41	320.121	8988.85	5.0162	23.0618	14.9666	0.0950963	17.4959	0.0159058	9.06117	0.517904		101.728	9.14544	92.2397	15.428	-146.771	372.83	101.728	9.14544
SG-13-93	291.27	10323	5.89795	20.5131	27.1003	0.107307	27.2804	0.0159646	3.12907	0.1147		102.101	3.16966	103.499	26.8498	135.797	647.177	102.101	3.16966
SG-13-105	277.474	14243.5	2.81303	23.6535	15.7544	0.0932382	16.3844	0.0159951	4.49977	0.274637		102.295	4.56673	90.5154	14.1895	-209.981	397.53	102.295	4.56673
SG-13-51	271.593	3395.93	1.18938	21.9819	13.6023	0.101139	14.3869	0.0161244	4.68634	0.325736		103.116	4.79391	97.8275	13.4184	-29.2106	330.972	103.116	4.79391
SG-13-48	218.514	4091.22	2.22513	22.2389	23.5508	0.100479	23.7022	0.0162064	2.67485	0.112852		103.636	2.74994	97.2184	21.9776	-57.4618	580.763	103.636	2.74994
SG-13-56	764.22	32112.7	2.25039	20.8475	4.34544	0.107784	4.60969	0.016297	1.53832	0.333715		104.21	1.5902	103.936	4.55412	97.6821	102.866	104.21	1.5902
SG-13-86	882.744	22778.4	3.61644	21.5246	4.4299	0.10479	4.53943	0.0163588	0.991167	0.218346		104.603	1.02842	101.188	4.37192	21.4607	106.39	104.603	1.02842
SG-13-19	327.974	8980.95	2.51468	20.096	9.18046	0.112482	9.38655	0.0163943	1.95615	0.208399		104.827	2.03399	108.233	9.63694	183.827	214.189	104.827	2.03399
SG-13-17	155.367	6422.66	3.86794	18.7775	13.4026	0.120644	14.309	0.0164302	5.01177	0.350253		105.055	5.22245	115.656	15.6427	339.713	304.719	105.055	5.22245
SG-13-71	185.199	8477.52	0.4896	20.7151	25.6975	0.109695	26.0657	0.0164807	4.36548	0.16748		105.375	4.56275	105.687	26.1686	112.716	615.246	105.375	4.56275
SG-13-61	255.864	4264.16	2.93802	24.2952	23.8555	0.09411	24.0543	0.0165827	3.08595	0.128291		106.022	3.24503	91.3248	21.0116	-277.629	614.2	106.022	3.24503
SG-13-45	997.264	25063.4	1.3183	21.2731	4.60733	0.107681	4.66412	0.0166137	0.72564	0.155579		106.219	0.764451	103.842	4.6039	49.6485	110.058	106.219	0.764451
SG-13-101	307.167	5539.16	1.49411	21.407	15.4399	0.107553	15.8885	0.0166985	3.74888	0.23595		106.757	3.96922	103.725	15.6677	34.633	371.59	106.757	3.96922
SG-13-78	57.6552	2268.1	3.46573	25.0595	76.4883	0.0925599	77.8375	0.0168226	14.4295	0.185379		107.544	15.3893	89.8852	67.0544	-357.075	2342.58	107.544	15.3893
SG-13-94	281.245	6859.65	3.28472	26.3087	22.2972	0.0885612	22.4728	0.0168982	2.80321	0.124738		108.023	3.00287	86.1622	18.5663	-484.49	597.703	108.023	3.00287
SG-13-24	171.802	3632.47	1.98994	20.815	38.8198	0.112616	39.009	0.017001	3.83754	0.0983758		108.674	4.13546	108.355	40.112	101.33	950.138	108.674	4.13546
SG-13-84	748.637	21438.5	2.57695	21.23	3.87599	0.110626	4.43428	0.0170336	2.15395	0.485749		108.881	2.32555	106.538	4.48483	54.4746	92.4781	108.881	2.32555
SG-13-29	553.39	8517.18	1.61052	21.2646	3.42132	0.110686	3.93919	0.0170706	1.95239	0.495633		109.116	2.11244	106.593	3.98603	50.5631	81.7034	109.116	2.11244
SG-13-90	138.813	5558.7	2.09245	19.0402	38.6007	0.125266	39.2953	0.0172983	7.35597	0.187197		110.559	8.06333	119.835	44.4453	308.112	910.22	110.559	8.06333
SG-13-34	336.089	9692.83	12.6858	21.8014	7.67121	0.110427	8.1989	0.0174605	2.89386	0.352957		111.586	3.20137	106.356	8.27903	-9.26154	185.442	111.586	3.20137
SG-13-73	74.279	2134.94	2.43244	33.8398	77.1202	0.0728263	77.4825	0.0178737	7.48468	0.0965983		114.204	8.47253	71.3779	53.4556	-1205.46	1043.26	114.204	8.47253
SG-13-2	276.866	4788.8	3.68516	26.265	15.5374	0.0944868	16.0877	0.0179989	4.17186	0.25932		114.997	4.75497	91.6744	14.103	-480.08	413.947	114.997	4.75497
SG-13-22	271.924	9229.58	3.66366	20.5498	19.2262	0.122782	19.3527	0.0182996	2.20984	0.114187		116.901	2.56004	117.591	21.492	131.595	455.742	116.901	2.56004
SG-13-62	71.9068	2094.32	2.94559	62.4795	73.2056	0.040479	74.3448	0.0183428	12.9646	0.174385		117.174	15.0539	40.2916	29.3763	0	296.977	117.174	15.0539
SG-13-7	414.418	11497.3	2.7972	20.415	5.72396	0.125427	6.14095	0.0185711	2.22431	0.362209		118.619	2.61433	119.98	6.94936	147.065	134.339	118.619	2.61433
SG-13-97	151.668	4760.59	2.34287	21.698	25.0693	0.118129	25.5214	0.0185899	4.78228	0.187383		118.738	5.6264	113.375	27.3845	2.20502	612.249	118.738	5.6264
SG-13-11	865.017	32613.2	1.38967	20.9529	4.51117	0.122385	4.72119	0.0185983	1.39246	0.294939		118.791	1.63897	117.232	5.22724	85.7343	107.042	118.791	1.63897
SG-13-44	87.3875	6817.45	4.25953	21.0921	41.3171	0.12242	43.3179	0.0187271	13.013	0.300408		119.606	15.4209	117.264	48.0084	69.9774	1022.15	119.606	15.4209
SG-13-103	142.953	6462.74	3.46136	18.258	13.6248	0.143004	13.8952	0.0189365	2.72773	0.196308		120.931	3.26792	135.716	17.6538	402.848	306.386	120.931	3.26792
SG-13-66	162.373	7028.75	2.81002	19.1677	11.7481	0.136924	12.5257	0.0190348	4.34478	0.346868		121.553	5.23172	130.3	15.3184	292.921	269.082	121.553	5.23172
SG-13-8	230.243	10657	1.8418	22.5547	13.6301	0.116911	14.5678	0.0191246	5.14206	0.352975		122.121	6.22042	112.268	15.4844	-91.933	335.664	122.121	6.22042
SG-13-58	319.823	6725.85	6.28805	19.3878	9.71441	0.137157	10.3869	0.0192862	3.67668	0.353972		123.143	4.48459	130.508	12.7214	266.797	223.311	123.143	4.48459
SG-13-57	169.911	3600.78	1.41617	26.5504	25.1926	0.100315	25.7543	0.0193167	5.34958	0.207716		123.336	6.53525	97.0667	23.8456	-508.818	680.658	123.336	6.53525
SG-13-14	351.44	15925.3	2.2568	20.1239	9.5855	0.133325	10.0124	0.0194591	2.89258	0.288899		124.237	3.55924	127.081	11.9604	180.597	223.81	124.237	3.55924
SG-13-102	212.209	6698.45	3.18804	22.6759	20.9025	0.118405	21.2082	0.0194731	3.58782	0.169171		124.325	4.41781	113.625	22.8023	-105.096	518.841	124.325	4.41781
SG-13-38	107.977	3137.24	1.67304	27.073	35.0911	0.102068	37.4723	0.0200412	13.1449	0.35079		127.916	16.6488	98.6834	35.253	-561.093	970.737	127.916	16.6488
SG-13-50	2196.34	50890.1	1.90206	20.6649	1.14489	0.133733	1.72681	0.0200434	1.29271	0.748611		127.93	1.63746	127.447	2.06825	118.418	26.9906	127.93	1.63746
SG-13-23	75.8235	7006.7	4.74465	22.0672	33.8427	0.126251	34.2301	0.020206	5.1355	0.150029		128.958	6.55683	120.724	38.9809	-38.6005	842.759	128.958	6.55683
SG-13-28	202.141	14388	1.69302	21.8093	21.4512	0.134168	26.1704	0.0212221	14.9911	0.572828		135.375	20.0827	127.836	31.4448	-10.136	523.18	135.375	20.0827
SG-13-37	54.7187	1479.24	0.607187	12.711	167.624	0.241472	168.195	0.022261	13.8537	0.0823671		141.93	19.4478	219.625	344.855	1163.88	610.875	141.93	19.4478
SG-13-26	67.7079	2034.35	0.893491	31.908	35.438	0.0965764	37.4976	0.0223496	12.2563	0.326857		142.488	17.2723	93.6112	33.5446	-1026.6	1083.72	142.488	17.2723
SG-13-21	87.5761	2699.25	1.20532	29.371	40.9321	0.108602	41.6715	0.0231341	7.81493	0.187537		147.433	11.3911	104.685	41.4735	-786.039	1198.9	147.433	11.3911
SG-13-39	112.969	4643.77	1.36992	20.7179	12.2308	0.15436	13.0218	0.0231942	4.4691	0.343202		147.812	6.53069	145.754	17.6822	112.398	289.555	147.812	6.53069
SG-13-16	320.79	15409	1.81472	21.5519	10.7616	0.149423	11.2573	0.0233562	3.30347	0.293452		148.832	4.8603	141.402	14.8604	18.4588	259.116	148.832	4.8603
SG-13-49	261.693	8425.12	0.932723	18.5287	10.4103	0.179877	10.8238	0.0241725	2.96322	0.273768		153.972	4.50848	167.955	16.7568	369.786	235.049	153.972	4.50848
SG-13-32	112.05	22010.3	2.17859	19.3455	29.9405	0.180789	30.6969	0.0253659	6.77257	0.220627		161.479	10.8005	168.739	47.7577	271.772	700.317	161.479	10.8005
SG-13-27	179.217	10639.4	0.729606	24.0393	17.2311	0.146099	17.3204	0.0254723	1.75666	0.101422		162.149	2.81288	138.462	22.4224	-250.766	438.762	162.149	2.81288
SG-13-96	742.147	21370.2	1.45383	20.1475	2.86221	0.174469	3.19578	0.025494	1.42154	0.444816		162.285	2.27814	163.29	4.82045	177.87	66.7552	162.285	2.27814
SG-13-4	671.954	45078.8	1.25647	20.9345	4.60103	0.169431	4.81554	0.0257249	1.42123	0.295135		163.736	2.29777	158.925	7.08434	87.8163	109.111	163.736	2.29777
SG-13-82	302.806	18479.8	1.44233	21.1552	7.67029	0.168675	7.81848	0.0258801	1.51502	0.193775		164.712	2.46381	158.268	11.4585	62.8727	182.926	164.712	2.46381
SG-13-91	143.002	8170.32	1.29662	20.0952	16.1861	0.1874	16.2437	0.0273125	1.36713	0.0841638		173.706	2.34308	174.408	26.0365	183.916	379.122	173.706	2.34308
SG-13-52	719.701	26669.9	1.56799	20.3032	2.83492	0.186311	3.4337	0.0274347	1.9374	0.564232		174.473	3.33491	173.476	5.47565	159.887	66.3245	174.473	3.33491
SG-13-74	210.81	8872.85	1.61894	20.3011	7.96839	0.187507	9.11174	0.0276082	4.41911	0.48499		175.561	7.65355	174.5	14.6098	160.138	186.644	175.561	7.65355
SG-13-63	347.029	41985.2	0.622833	19.9738	6.24319	0.192733	6.72785	0.02792	2.50731	0.372676		177.517	4.39019	178.959	11.0392	198.052	145.151	177.517	4.39019
SG-13-98	1094.9	82882.6	3.57715	19.6691	1.84222	0.245651	2.4526	0.0350431	1.6191	0.660157		222.034	3.53376	223.037	4.91114	233.653	42.5233	222.034	3.53376
SG-13-75	827.434	53223.1	2.69484	19.5933	2.12634	0.250488	2.53183	0.0355954	1.37434	0.542826		225.473	3.0452	226.973	5.14963	242.521	49.0035	225.473	3.0452
SG-13-9	606.344	28362.6	2.51528	19.7846	2.82425	0.267196	3.19706	0.0383404	1.49826	0.468638		242.538	3.56634	240.449	6.845	220.084	65.3372	242.538	3.56634
SG-13-53	172.288	9461.54	1.8054	19.5245	10.7609	0.292231	10.9388	0.0413813	1.96481	0.179619		261.389	5.03306	260.314	25.1231	250.622	248.217	261.389	5.03306
SG-13-13	455.427	51944.9	1.19336	15.8378	1.35045	0.943144	1.7477	0.108336	1.10938	0.634766		663.076	6.99034	674.526	8.61349	712.928	28.6782	663.076	6.99034
SG-13-42	158.315	102246	1.70795	9.79637	0.66567	4.14613	2.23655	0.294582	2.13519	0.95468		1664.39	31.321	1663.45	18.2986	1662.24	12.3211	1662.24	12.3211
SG-13-100	323.77	154535	2.01905	9.58791	0.34723	4.13801	5.18293	0.287749	5.17129	0.997753		1630.27	74.4937	1661.84	42.4086	1701.95	6.39375	1701.95	6.39375
SG-13-70	200.116	100686	1.77075	9.51478	0.243759	4.41542	2.89642	0.304698	2.88614	0.996452		1714.56	43.4512	1715.24	23.9835	1716.04	4.48174	1716.04	4.48174
SJB-3 (JG-MY5)
JG-MY4-5	207.621	919.984	2.1541	32.7891	13.1293	0.0144683	13.1874	0.00344218	1.23666	0.0937761		22.1516	0.273471	14.5856	1.90971	NA	NA	22.1516	0.273471
JG-MY4-106	178.595	908.3	2.4739	31.4463	12.0514	0.0152899	12.1112	0.00348869	1.20116	0.0991776		22.4504	0.269195	15.4077	1.85196	NA	NA	22.4504	0.269195
JG-MY4-90	167.611	1199.89	2.29677	20.6812	5.99643	0.0239166	6.16735	0.00358892	1.4419	0.233796		23.0942	0.3324	23.9986	1.46273	115.571	141.521	23.0942	0.3324
JG-MY4-29	210.309	4866.69	2.38543	22.845	2.68288	0.021743	3.16776	0.00360411	1.6843	0.531701		23.1918	0.389918	21.8409	0.684478	NA	NA	23.1918	0.389918
JG-MY4-76	476.293	21315.2	2.06978	20.6696	1.53478	0.0242756	2.33092	0.00364075	1.75432	0.752631		23.4271	0.410242	24.3546	0.560933	116.894	36.2101	23.4271	0.410242
JG-MY4-67	710.487	15614.1	1.73294	21.7396	2.31168	0.0232832	2.75382	0.00367267	1.49655	0.543444		23.6322	0.353019	23.3703	0.636228	NA	NA	23.6322	0.353019
JG-MY4-0	268.39	2395.56	1.70489	24.5512	8.00429	0.0227698	8.20036	0.0040562	1.78247	0.217365		26.0951	0.464196	22.8607	1.85372	NA	NA	26.0951	0.464196
JG-MY4-101	353.677	17230.6	1.49398	20.7252	1.35589	0.0850203	2.10641	0.0127853	1.612	0.765282		81.8967	1.31182	82.854	1.67594	110.527	32.0221	81.8967	1.31182
JG-MY4-137	746.058	13935.7	1.3411	21.1359	1.03419	0.0881414	1.67684	0.0135172	1.31994	0.78716		86.5541	1.13483	85.7705	1.37917	64.0187	24.6297	86.5541	1.13483
JG-MY4-132	334.42	207892	3.71808	20.8083	1.00964	0.0932362	1.89346	0.014077	1.60182	0.845974		90.1132	1.43341	90.5136	1.63967	101.097	23.8791	90.1132	1.43341
JG-MY4-96	544.539	11139.2	2.40858	21.3449	1.07536	0.0913514	1.92662	0.0141481	1.59858	0.829735		90.5651	1.43763	88.7615	1.63748	40.5498	25.7329	90.5651	1.43763
JG-MY4-32	519.689	10030	4.12666	21.4492	0.94639	0.0914954	1.75318	0.0142396	1.4758	0.841785		91.1472	1.33569	88.8955	1.49222	28.8504	22.7123	91.1472	1.33569
JG-MY4-93	455.579	30029.7	2.3308	20.6073	1.06165	0.0952583	1.70662	0.0142434	1.3362	0.782952		91.1709	1.20965	92.3899	1.50714	123.962	25.012	91.1709	1.20965
JG-MY4-122	1038.5	29386.5	3.239	20.8736	0.928035	0.0942292	1.72057	0.0142715	1.44883	0.842065		91.3498	1.31417	91.4355	1.50446	93.6618	21.9697	91.3498	1.31417
JG-MY4-130	330.017	90363	2.45125	20.4604	1.15027	0.097029	1.81906	0.0144047	1.40921	0.774688		92.196	1.28998	94.0301	1.63366	140.835	26.9964	92.196	1.28998
JG-MY4-45	518.445	26942.4	2.23233	20.9173	1.31264	0.0949125	3.90723	0.0144051	3.68014	0.941879		92.199	3.3689	92.0693	3.4391	88.733	31.1292	92.199	3.3689
JG-MY4-54	848.574	100437	2.6648	20.9811	1.10855	0.0947193	2.03057	0.0144197	1.70127	0.83783		92.2913	1.55894	91.8901	1.78395	81.462	26.3107	92.2913	1.55894
JG-MY4-14	312.72	5326.65	2.23563	21.2947	1.8114	0.0938862	2.47767	0.0145064	1.69046	0.682279		92.8427	1.55822	91.1171	2.15925	46.1486	43.2976	92.8427	1.55822
JG-MY4-61	180.928	19691.4	2.94847	20.8209	1.47833	0.0961332	1.89433	0.0145232	1.18449	0.625283		92.9491	1.09307	93.2007	1.68692	99.6695	34.965	92.9491	1.09307
JG-MY4-78	740.338	18685.6	2.69229	20.7969	1.07051	0.0965268	1.73893	0.0145658	1.37036	0.788048		93.2198	1.26825	93.5652	1.55432	102.364	25.3355	93.2198	1.26825
JG-MY4-95	370.326	73289.3	2.51394	20.5081	1.35209	0.0980765	1.74113	0.0145941	1.097	0.630049		93.4	1.01721	94.9993	1.57904	135.318	31.7606	93.4	1.01721
JG-MY4-59	303.895	7451.33	2.75022	21.9078	1.97288	0.0918338	2.43382	0.0145979	1.42521	0.585585		93.4237	1.32188	89.2102	2.07858	NA	NA	93.4237	1.32188
JG-MY4-25	167.369	11065.4	2.61143	21.6611	1.70161	0.0935344	2.1118	0.0147008	1.25068	0.592234		94.0773	1.16806	90.7905	1.83409	5.23529	40.966	94.0773	1.16806
JG-MY4-60	70.9115	1441.62	2.20122	28.2993	15.0267	0.0716769	15.0922	0.0147178	1.4045	0.0930611		94.1856	1.31322	70.2895	10.2497	NA	NA	94.1856	1.31322
JG-MY4-39	90.175	18958.5	2.67859	21.2638	2.32071	0.0954903	2.72589	0.0147329	1.42996	0.524586		94.2817	1.33838	92.605	2.41262	49.642	55.4	94.2817	1.33838
JG-MY4-109	406.352	14731.3	2.02254	21.1268	1.05399	0.0964189	1.71197	0.0147803	1.34906	0.788015		94.5826	1.26666	93.4654	1.52867	65.0197	25.0798	94.5826	1.26666
JG-MY4-87	648.095	28153.6	2.4874	20.7403	0.906876	0.098477	1.45356	0.0148197	1.13597	0.781505		94.8327	1.06938	95.3696	1.32315	108.824	21.4086	94.8327	1.06938
JG-MY4-7	763.987	40753.1	3.52185	20.4764	0.959007	0.1002	1.73213	0.014887	1.44242	0.832744		95.2602	1.36395	96.9605	1.60178	138.958	22.5312	95.2602	1.36395
JG-MY4-73	247.292	9206.03	4.1021	21.3471	1.40349	0.0962788	1.88945	0.0149127	1.26501	0.669511		95.4238	1.19823	93.3356	1.68491	40.3049	33.5569	95.4238	1.19823
JG-MY4-117	120.99	3285.58	2.26512	21.6809	5.24995	0.0949262	5.34617	0.0149331	1.00972	0.188868		95.5535	0.957708	92.082	4.70627	3.05528	126.538	95.5535	0.957708
JG-MY4-94	347.596	14980.1	2.69522	20.5264	1.5031	0.100323	2.11984	0.0149418	1.49479	0.705145		95.6085	1.4186	97.0748	1.96252	133.234	35.3162	95.6085	1.4186
JG-MY4-111	207.603	6529.27	1.61208	21.955	1.9161	0.0939979	2.18626	0.014974	1.05274	0.481527		95.8131	1.0012	91.2207	1.90736	NA	NA	95.8131	1.0012
JG-MY4-133	211.492	5774.83	2.46693	21.491	1.41854	0.0962494	1.69001	0.0150087	0.918633	0.543567		96.0333	0.875655	93.3083	1.50663	24.1857	34.0377	96.0333	0.875655
JG-MY4-112	398.494	18099.7	3.65023	18.8682	1.66602	0.109734	2.20908	0.0150231	1.45065	0.656677		96.1248	1.38409	105.722	2.21801	327.748	37.8109	96.1248	1.38409
JG-MY4-104	318.329	7827.34	3.72596	21.5759	2.25903	0.0962983	2.70893	0.0150756	1.49502	0.551885		96.4582	1.43133	93.3536	2.41612	14.7426	54.2861	96.4582	1.43133
JG-MY4-24	156.283	3648.06	1.25582	22.5975	1.62322	0.0923135	2.01157	0.0151361	1.1881	0.59063		96.8425	1.14198	89.6562	1.72617	NA	NA	96.8425	1.14198
JG-MY4-22	187.335	33626.2	3.73213	20.4835	2.01173	0.102031	2.40786	0.0151644	1.32314	0.549509		97.0224	1.27413	98.6498	2.26361	138.166	47.2482	97.0224	1.27413
JG-MY4-138	793.165	14985.8	2.19928	20.7792	1.05664	0.100817	1.75881	0.0152002	1.40603	0.799422		97.2495	1.3571	97.5301	1.63556	104.398	24.9752	97.2495	1.3571
JG-MY4-118	425.449	9137.18	3.02107	21.4143	1.26029	0.0980637	2.20754	0.015237	1.81242	0.821017		97.4833	1.75352	94.9874	2.00179	32.7799	30.1845	97.4833	1.75352
JG-MY4-135	163.948	3734.97	2.98496	22.8013	1.45454	0.0922012	1.9681	0.015254	1.32579	0.673641		97.5912	1.28411	89.5518	1.68699	NA	NA	97.5912	1.28411
JG-MY4-62	295.488	64122.5	2.45467	20.7502	1.13873	0.101382	1.86736	0.0152641	1.47998	0.79255		97.6554	1.43439	98.0514	1.74535	107.713	26.9117	97.6554	1.43439
JG-MY4-31	704.892	44405.3	3.51663	20.4951	1.02964	0.103088	1.89377	0.0153301	1.58941	0.83928		98.0746	1.54701	99.6227	1.79703	136.849	24.1906	98.0746	1.54701
JG-MY4-11	347.738	16770.7	2.11531	21.0711	1.41365	0.100567	2.1229	0.0153755	1.58376	0.746038		98.3626	1.54601	97.2991	1.96969	71.2904	33.6209	98.3626	1.54601
JG-MY4-77	805.95	14785.6	3.23423	20.8642	0.983776	0.101779	1.76924	0.0154081	1.47051	0.831152		98.5694	1.43844	98.4171	1.65951	94.7416	23.2812	98.5694	1.43844
JG-MY4-21	72.2881	3159.99	1.49117	21.2176	2.86252	0.100144	3.07651	0.0154174	1.12734	0.366435		98.6284	1.10342	96.9093	2.84357	54.7907	68.2772	98.6284	1.10342
JG-MY4-99	67.9521	4035.24	2.14334	21.3031	3.45365	0.0997431	3.67333	0.0154175	1.25126	0.340635		98.6291	1.22472	96.5392	3.38286	45.2377	82.5589	98.6291	1.22472
JG-MY4-142	307.336	18268.2	3.68778	20.5825	1.26093	0.103309	1.83839	0.0154284	1.33781	0.727708		98.6985	1.31034	99.8258	1.74786	126.853	29.6943	98.6985	1.31034
JG-MY4-140	454.319	7779.17	2.30516	21.3701	1.19579	0.0996278	1.91992	0.0154481	1.50206	0.782354		98.8236	1.47307	96.4327	1.76624	37.6761	28.6431	98.8236	1.47307
JG-MY4-113	1040.04	106734	4.35327	20.6162	1.12001	0.103973	1.90358	0.0155532	1.53921	0.80859		99.4906	1.51962	100.438	1.82039	122.949	26.3807	99.4906	1.51962
JG-MY4-44	156.995	4356.07	1.93319	21.2478	1.53412	0.100982	1.92882	0.0155684	1.16912	0.606133		99.5874	1.15535	97.6824	1.79633	51.4029	36.625	99.5874	1.15535
JG-MY4-16	137.289	4005.42	3.62216	21.2344	1.57405	0.101217	1.82697	0.0155948	0.927458	0.507648		99.7548	0.918063	97.8989	1.70507	52.9194	37.557	99.7548	0.918063
JG-MY4-127	352.875	22306.6	4.49657	20.7174	1.31818	0.10414	2.05869	0.0156546	1.58134	0.768126		100.134	1.57122	100.591	1.97158	111.413	31.1293	100.134	1.57122
JG-MY4-97	376.986	12532.6	3.31305	20.8192	1.56857	0.103666	2.2787	0.0156599	1.65289	0.725365		100.168	1.64286	100.155	2.17328	99.862	37.11	100.168	1.64286
JG-MY4-27	979.207	160694	4.54066	20.7406	0.885199	0.104104	1.73012	0.0156667	1.48651	0.859199		100.211	1.47813	100.558	1.6564	108.808	20.8941	100.211	1.47813
JG-MY4-85	178.701	50129.4	3.27297	20.5369	1.39131	0.105326	1.75395	0.015695	1.06799	0.608905		100.39	1.06386	101.681	1.69705	132.03	32.6983	100.39	1.06386
JG-MY4-147	963.986	88314.6	3.38384	20.442	0.813677	0.106099	1.69562	0.015737	1.48763	0.877339		100.658	1.48578	102.391	1.65149	142.941	19.1089	100.658	1.48578
JG-MY4-114	703.82	13229.4	3.59795	20.9823	1.11267	0.104657	1.84403	0.0159334	1.47052	0.797445		101.904	1.48673	101.066	1.77395	81.3345	26.4041	101.904	1.48673
JG-MY4-23	307.441	7514.62	2.73991	21.2368	1.46753	0.103517	2.02992	0.015951	1.40247	0.690898		102.016	1.41947	100.018	1.93349	52.6727	35.0487	102.016	1.41947
JG-MY4-53	780.016	9485.7	3.6198	21.1271	0.994232	0.104269	1.71695	0.0159839	1.3998	0.81528		102.224	1.41964	100.709	1.64615	64.9843	23.6732	102.224	1.41964
JG-MY4-68	377.788	17157.5	4.13273	20.5756	1.15487	0.107371	2.06344	0.0160298	1.70999	0.828707		102.516	1.73914	103.558	2.0315	127.637	27.1981	102.516	1.73914
JG-MY4-51	335.072	44872.9	2.48657	20.7805	1.2063	0.106427	1.91312	0.016047	1.48488	0.776158		102.624	1.51179	102.691	1.86853	104.247	28.5363	102.624	1.51179
JG-MY4-42	464.501	22930.3	2.99496	19.3677	1.5473	0.115142	2.23145	0.0161808	1.60787	0.720548		103.473	1.65043	110.658	2.33949	268.138	35.4755	103.473	1.65043
JG-MY4-100	676.485	66228.8	3.04035	20.6114	1.10397	0.108673	1.80576	0.0162523	1.429	0.791352		103.927	1.4732	104.75	1.79725	123.505	25.9888	103.927	1.4732
JG-MY4-13	116.604	6025.45	2.73347	21.4754	2.04096	0.104395	2.32696	0.0162671	1.11769	0.480323		104.021	1.1533	100.826	2.23345	25.9442	48.9365	104.021	1.1533
JG-MY4-66	299.635	44080	2.91176	20.505	1.36746	0.109481	2.04349	0.0162886	1.51851	0.7431		104.157	1.56893	105.49	2.04748	135.723	32.1212	104.157	1.56893
JG-MY4-6	264.939	57522	2.70014	20.6361	1.28969	0.108893	2.17762	0.0163049	1.75463	0.805756		104.26	1.81466	104.953	2.17132	120.694	30.4041	104.26	1.81466
JG-MY4-139	206.685	10975.2	4.52917	20.7438	1.82958	0.10939	2.1316	0.0164647	1.09378	0.513126		105.274	1.14211	105.407	2.13417	108.426	43.2157	105.274	1.14211
JG-MY4-49	608.982	47082.6	2.88342	19.8565	0.97917	0.114328	1.73728	0.0164718	1.43504	0.826032		105.319	1.4991	109.917	1.80983	210.717	22.717	105.319	1.4991
JG-MY4-148	194.551	50597.9	2.51948	20.5859	1.37494	0.110436	1.73165	0.0164957	1.05269	0.607914		105.47	1.10125	106.364	1.74867	126.46	32.3839	105.47	1.10125
JG-MY4-84	1177.74	70304.6	3.44086	20.4732	0.892375	0.111164	1.60063	0.0165135	1.32879	0.830166		105.583	1.39155	107.03	1.62595	139.357	20.9516	105.583	1.39155
JG-MY4-2	164.936	3771.45	2.58547	22.1656	3.90338	0.102866	4.10441	0.016544	1.26878	0.309126		105.777	1.33112	99.4183	3.88715	NA	NA	105.777	1.33112
JG-MY4-131	62.4079	16124.7	3.06463	21.8377	2.74961	0.104435	3.05818	0.0165479	1.33869	0.437742		105.801	1.4048	100.862	2.9363	NA	NA	105.801	1.4048
JG-MY4-108	154.291	8336.28	2.93364	20.7686	2.52799	0.109851	2.77287	0.0165538	1.13933	0.410885		105.839	1.19601	105.829	2.78675	105.572	59.7357	105.839	1.19601
JG-MY4-12	115.316	74009.6	2.09847	20.4078	1.74693	0.112136	2.00371	0.0166047	0.981373	0.489779		106.162	1.03331	107.918	2.05142	146.874	40.9693	106.162	1.03331
JG-MY4-86	177.945	13277.6	2.64434	21.4743	1.32768	0.107133	1.63146	0.0166929	0.948115	0.581146		106.721	1.00351	103.34	1.60299	26.0285	31.8232	106.721	1.00351
JG-MY4-72	57.4336	1749.27	3.27685	24.4824	10.781	0.0940607	10.85	0.016709	1.22198	0.112625		106.823	1.2946	91.279	9.47194	NA	NA	106.823	1.2946
JG-MY4-128	139.447	41888.4	4.34104	21.689	1.83151	0.106525	2.14142	0.0167641	1.10961	0.518168		107.173	1.17937	102.782	2.09326	2.10787	44.1097	107.173	1.17937
JG-MY4-34	97.4682	4003.12	2.25403	21.7312	4.5919	0.106731	4.68074	0.0168291	0.907597	0.1939		107.585	0.968332	102.97	4.58347	NA	NA	107.585	0.968332
JG-MY4-88	363.568	13732.7	3.08377	21.1367	1.22378	0.110152	1.82378	0.0168934	1.35224	0.741448		107.992	1.44815	106.105	1.83745	63.9133	29.1423	107.992	1.44815
JG-MY4-82	232.629	20202.9	3.4329	20.4418	1.27175	0.113975	1.86205	0.016905	1.36009	0.73043		108.066	1.45755	109.595	1.93444	142.956	29.8444	108.066	1.45755
JG-MY4-124	110.299	30138.9	2.80532	20.2716	1.85344	0.115307	2.15096	0.0169602	1.09151	0.507453		108.416	1.17347	110.808	2.258	162.511	43.3328	108.416	1.17347
JG-MY4-144	57.9599	2995.87	2.40593	22.2801	3.46338	0.10508	3.68941	0.0169873	1.2715	0.344635		108.588	1.36913	101.455	3.56217	NA	NA	108.588	1.36913
JG-MY4-56	241.316	9738.57	2.75474	21.4228	1.54718	0.10929	2.00517	0.0169881	1.27551	0.63611		108.592	1.3735	105.316	2.00593	31.8226	37.0492	108.592	1.3735
JG-MY4-19	58.6394	1448.43	2.70312	25.1502	6.15489	0.0931197	6.25174	0.016993	1.09616	0.175337		108.624	1.18072	90.4053	5.40765	NA	NA	108.624	1.18072
JG-MY4-69	244.005	24486.1	1.15279	21.0732	1.33984	0.111833	1.66361	0.0170997	0.986114	0.592756		109.3	1.06873	107.641	1.69907	71.0613	31.8582	109.3	1.06873
JG-MY4-46	182.742	27272.5	3.37494	20.9335	1.4438	0.1133	1.86418	0.0172092	1.17923	0.632575		109.994	1.28608	108.98	1.92636	86.904	34.2467	109.994	1.28608
JG-MY4-38	609.15	18220	2.04358	20.6589	1.19111	0.115545	1.89331	0.0173198	1.47169	0.777312		110.695	1.61518	111.025	1.9912	118.092	28.0903	110.695	1.61518
JG-MY4-123	95.015	4997.71	2.96837	21.8803	2.35032	0.10916	2.7818	0.0173302	1.48808	0.534936		110.761	1.63413	105.196	2.77987	NA	NA	110.761	1.63413
JG-MY4-121	130.379	16982.5	2.2726	20.2378	1.91032	0.118102	2.20687	0.0173423	1.10497	0.500695		110.837	1.21425	113.349	2.36691	166.415	44.6294	110.837	1.21425
JG-MY4-116	138.322	5154.74	1.69869	21.4818	1.99537	0.112235	2.42081	0.0174938	1.3707	0.566215		111.798	1.51919	108.007	2.4804	25.2105	47.8484	111.798	1.51919
JG-MY4-125	273.906	10257.3	1.99683	20.9297	1.4728	0.115402	2.2915	0.0175253	1.75551	0.766097		111.997	1.94913	110.895	2.40732	87.335	34.9324	111.997	1.94913
JG-MY4-105	178.183	7267.95	2.06534	20.9292	1.7972	0.115423	2.22961	0.017528	1.31957	0.591837		112.014	1.46534	110.914	2.34269	87.3907	42.6228	112.014	1.46534
JG-MY4-35	147.775	23211.2	3.01863	20.7954	1.64487	0.11618	2.15079	0.0175303	1.38575	0.644296		112.028	1.53902	111.603	2.27315	102.566	38.8908	112.028	1.53902
JG-MY4-43	463.78	44363.9	3.34817	20.7222	1.01923	0.116942	1.71426	0.017583	1.37835	0.804052		112.362	1.53533	112.296	1.82241	110.862	24.0487	112.362	1.53533
JG-MY4-3	519.352	11766.7	2.52031	21.0938	1.13183	0.114966	1.8216	0.0175959	1.4273	0.783543		112.444	1.591	110.498	1.90718	68.781	26.926	112.444	1.591
JG-MY4-15	2014.95	65820.4	4.44598	20.0699	1.15011	0.120845	2.01219	0.017598	1.65111	0.820553		112.458	1.84069	115.838	2.20284	185.839	26.7687	112.458	1.84069
JG-MY4-134	116.638	147187	2.77117	20.3939	1.56678	0.118992	2.13188	0.0176078	1.44573	0.678145		112.519	1.61261	114.158	2.30189	148.451	36.7206	112.519	1.61261
JG-MY4-8	158.966	4618.26	5.04813	21.9027	1.93786	0.111212	2.24782	0.017674	1.13903	0.506728		112.939	1.27521	107.073	2.28426	NA	NA	112.939	1.27521
JG-MY4-143	484.318	108036	3.97283	20.2719	1.14582	0.120876	1.83191	0.0177796	1.42934	0.780243		113.608	1.60961	115.866	2.00593	162.471	26.7839	113.608	1.60961
JG-MY4-71	225.14	18155.2	3.01387	20.7887	1.44122	0.117898	1.72299	0.0177836	0.944237	0.548023		113.633	1.06357	113.164	1.84508	103.331	34.0729	113.633	1.06357
JG-MY4-75	75.3084	2391.52	3.30318	21.4176	3.59227	0.114891	3.86557	0.0178544	1.42767	0.369329		114.082	1.61438	110.43	4.04484	32.3814	86.0725	114.082	1.61438
JG-MY4-20	187.771	11258.8	2.41575	20.8723	1.60766	0.117973	1.91201	0.0178665	1.035	0.541313		114.158	1.17113	113.232	2.04867	93.8166	38.0766	114.158	1.17113
JG-MY4-55	94.7772	64325.4	1.73091	19.6901	2.09371	0.125261	2.33968	0.0178958	1.04426	0.446326		114.344	1.18352	119.831	2.64454	230.148	48.3817	114.344	1.18352
JG-MY4-119	48.7886	2383.5	3.24422	24.3324	8.01437	0.101511	8.09769	0.017922	1.15862	0.143081		114.51	1.31502	98.1704	7.57747	NA	NA	114.51	1.31502
JG-MY4-120	83.2593	3452.71	3.69617	21.9934	3.89115	0.112574	4.0365	0.0179647	1.07345	0.265936		114.78	1.22121	108.318	4.14713	NA	NA	114.78	1.22121
JG-MY4-136	201	23741	2.22379	21.145	1.45529	0.11726	1.78352	0.0179907	1.03105	0.578102		114.945	1.17464	112.585	1.90066	62.9583	34.685	114.945	1.17464
JG-MY4-92	724.746	14362.6	4.85446	20.6815	1.16521	0.119906	2.05785	0.0179933	1.69618	0.824249		114.961	1.93266	114.987	2.23719	115.538	27.481	114.961	1.93266
JG-MY4-1	527.219	27126.1	3.17369	20.4692	0.965133	0.121631	1.86677	0.0180648	1.59792	0.855981		115.414	1.82781	116.55	2.0555	139.803	22.6623	115.414	1.82781
JG-MY4-146	47.4024	4593.79	3.43859	21.6211	2.16845	0.115187	2.66903	0.0180704	1.55614	0.583035		115.45	1.78057	110.699	2.79924	9.68592	52.1653	115.45	1.78057
JG-MY4-102	45.729	12859.7	2.91791	20.322	2.69809	0.122657	3.02113	0.0180861	1.35925	0.449915		115.549	1.55661	117.478	3.35154	156.698	63.1784	115.549	1.55661
JG-MY4-80	37.5621	206182	4.83359	21.69	2.44874	0.115563	2.81615	0.0181871	1.39082	0.493874		116.188	1.6015	111.041	2.96218	2.04959	59.01	116.188	1.6015
JG-MY4-129	201.698	15906.9	3.56905	20.7318	1.5275	0.121077	1.98552	0.0182132	1.26848	0.638863		116.354	1.46268	116.048	2.17737	109.785	36.0812	116.354	1.46268
JG-MY4-74	338.885	8405.75	3.53894	21.1375	2.00148	0.118907	2.70413	0.0182368	1.81835	0.672435		116.503	2.0994	114.081	2.91792	63.839	47.6757	116.503	2.0994
JG-MY4-48	210.531	6515.64	4.2485	21.4745	1.82203	0.117372	2.88831	0.0182885	2.2411	0.775921		116.83	2.59469	112.687	3.08066	26.0143	43.6847	116.83	2.59469
JG-MY4-70	67.6956	7732.31	2.84576	20.2061	2.03902	0.125138	2.21584	0.0183469	0.867384	0.391447		117.2	1.00739	119.72	2.50239	170.069	47.6159	117.2	1.00739
JG-MY4-98	163.815	4891.85	4.41525	22.0039	1.9312	0.114931	2.24318	0.0183494	1.14118	0.508735		117.216	1.32556	110.466	2.34791	NA	NA	117.216	1.32556
JG-MY4-83	206.783	4640.84	2.56021	21.9734	1.64901	0.115656	2.04443	0.0184396	1.20849	0.591114		117.787	1.41051	111.126	2.15198	NA	NA	117.787	1.41051
JG-MY4-126	104.35	35468.3	2.92472	20.2877	1.96203	0.126741	2.22797	0.0186569	1.05559	0.47379		119.162	1.2463	121.165	2.54468	160.697	45.8879	119.162	1.2463
JG-MY4-63	196.434	9585.82	8.4311	21.5895	1.53415	0.119305	1.8237	0.0186891	0.98603	0.540676		119.365	1.16615	114.442	1.97376	13.2105	36.8816	119.365	1.16615
JG-MY4-107	77.4016	4996.78	3.98982	21.3316	3.0596	0.12096	3.24114	0.0187221	1.06948	0.329972		119.574	1.26704	115.942	3.55126	42.0186	73.1752	119.574	1.26704
JG-MY4-110	161.318	10076.4	1.79197	21.2856	2.00984	0.121244	2.23513	0.0187255	0.977925	0.437525		119.596	1.15878	116.199	2.45411	47.1792	48.0071	119.596	1.15878
JG-MY4-141	309.599	33766.8	4.60316	20.6663	1.30019	0.1255	2.12961	0.018819	1.68663	0.791992		120.187	2.00834	120.046	2.41118	117.276	30.6389	120.187	2.00834
JG-MY4-26	151.827	3243.91	2.03553	22.8975	4.99276	0.113378	5.07172	0.0188367	0.89147	0.175773		120.3	1.06249	109.051	5.24416	NA	NA	120.3	1.06249
JG-MY4-50	159.298	6900.62	4.2735	21.3195	1.84264	0.122021	2.13439	0.0188755	1.07718	0.504677		120.545	1.28642	116.903	2.35689	43.3947	44.055	120.545	1.28642
JG-MY4-4	77.2609	7040.51	2.44881	21.0077	1.96043	0.12436	2.28472	0.0189559	1.17331	0.513548		121.054	1.40709	119.017	2.56588	78.4593	46.5441	121.054	1.40709
JG-MY4-41	257.277	15308.7	3.74676	20.708	1.27649	0.126326	2.04252	0.0189811	1.59452	0.780661		121.213	1.91471	120.791	2.3261	112.479	30.1494	121.213	1.91471
JG-MY4-115	57.5213	17490.8	2.4149	19.8844	2.44402	0.132542	2.67389	0.0191229	1.08463	0.405638		122.11	1.31198	126.379	3.17741	207.423	56.6876	122.11	1.31198
JG-MY4-52	144.59	3118.27	4.29024	23.116	1.79631	0.114028	2.19115	0.0191254	1.25474	0.572643		122.126	1.51794	109.643	2.27728	NA	NA	122.126	1.51794
JG-MY4-28	40.6875	1209.6	2.75593	28.3072	10.7327	0.0934969	10.7939	0.0192036	1.14758	0.106317		122.62	1.39386	90.7557	9.37131	NA	NA	122.62	1.39386
JG-MY4-40	61.6121	71668.4	5.61982	20.0251	2.08542	0.133038	2.34659	0.0193303	1.07588	0.458486		123.422	1.31524	126.824	2.79769	191.081	48.5098	123.422	1.31524
JG-MY4-33	42.2472	150270	3.34105	19.5884	2.38878	0.136177	2.74057	0.0193548	1.3433	0.490153		123.577	1.6442	129.633	3.33527	242.096	55.0592	123.577	1.6442
JG-MY4-18	78.0574	18121.6	2.31216	20.6326	2.11868	0.129964	2.54568	0.0194564	1.41127	0.554378		124.22	1.73629	124.065	2.97299	121.105	49.9034	124.22	1.73629
JG-MY4-149	61.6484	3067.79	2.89154	23.3926	3.09085	0.115553	3.3194	0.0196132	1.21039	0.36464		125.211	1.50091	111.033	3.49127	NA	NA	125.211	1.50091
JG-MY4-47	136.536	55217.7	2.81431	20.1445	1.78595	0.137313	2.08811	0.0200703	1.08194	0.518143		128.1	1.37229	130.647	2.55985	177.199	41.6473	128.1	1.37229
JG-MY4-37	224.272	7237.22	1.42228	20.566	1.15649	0.138136	1.66585	0.0206132	1.19901	0.719754		131.53	1.56108	131.383	2.05296	128.732	27.1984	131.53	1.56108
JG-MY4-17	95.5698	23977.9	2.5754	20.7414	1.59574	0.143579	1.94003	0.0216081	1.10333	0.568717		137.811	1.50437	136.227	2.47323	108.692	37.703	137.811	1.50437
JG-MY4-91	131.123	22942.7	1.46616	20.9832	1.36064	0.146088	1.77887	0.0222421	1.14588	0.644161		141.81	1.60724	138.452	2.30236	81.2245	32.3234	141.81	1.60724
JG-MY4-65	182.48	13813.5	1.19599	20.1375	1.26786	0.158902	1.61044	0.0232178	0.993011	0.616607		147.961	1.45253	149.741	2.24212	178.006	29.5665	147.961	1.45253
JG-MY4-9	557.498	58658.8	1.7586	20.3974	0.894425	0.157807	1.7163	0.0233555	1.46481	0.853473		148.828	2.15508	148.782	2.37527	148.071	20.948	148.828	2.15508
JG-MY4-30	349.371	20266.7	2.14123	20.5364	1.1733	0.15741	1.92829	0.0234555	1.53026	0.793581		149.458	2.26078	148.433	2.66286	132.117	27.5919	149.458	2.26078
JG-MY4-36	305.952	21184.2	2.25627	20.157	1.05155	0.168521	2.37499	0.0246473	2.12951	0.896641		156.96	3.30211	158.135	3.47785	175.745	24.5103	156.96	3.30211
JG-MY4-103	131.063	15482.2	4.25495	20.6246	1.52496	0.166864	1.88059	0.0249709	1.1005	0.585187		158.996	1.72834	156.694	2.73066	122.027	35.9267	158.996	1.72834
JG-MY4-10	296.244	7056.18	2.27901	20.9032	1.14072	0.167466	2.03983	0.0253996	1.69105	0.829017		161.691	2.70028	157.217	2.97103	90.3205	27.0301	161.691	2.70028
JG-MY4-58	282.547	43450.4	4.73734	20.0969	1.09398	0.174247	1.87931	0.0254087	1.52808	0.813107		161.749	2.4409	163.098	2.83163	182.713	25.5	161.749	2.4409
JG-MY4-145	414.195	18768.9	2.50429	20.4588	1.08616	0.180083	1.90104	0.0267325	1.56019	0.820706		170.066	2.61866	168.132	2.94565	141.001	25.4761	170.066	2.61866
JG-MY4-89	174.242	10831.5	1.99281	19.8905	1.29572	0.188125	1.73165	0.0271507	1.14879	0.663408		172.691	1.95752	175.028	2.78404	206.717	30.0558	172.691	1.95752
JG-MY4-79	188.603	32304.6	2.70784	19.3292	1.02148	0.298638	1.40114	0.0418838	0.959047	0.684476		264.499	2.48534	265.336	3.27168	272.706	23.4081	264.499	2.48534
JG-MY4-81	133.161	38424.6	2.31041	19.2778	1.28247	0.305461	1.65337	0.0427269	1.0435	0.631136		269.714	2.7564	270.657	3.92821	278.845	29.3781	269.714	2.7564
AG-1 (Agua2)
JG-AGUA2-77	161.942	1874.79	0.612589	26.097	3.99726	0.0202295	5.22434	0.00383057	3.36388	0.643886		24.6463	0.827487	20.3357	1.05184	NA	NA	24.6463	0.827487
JG-AGUA2-97	1981.76	36621.9	0.589493	20.0273	1.7257	0.0290142	2.29812	0.00421619	1.51767	0.660396		27.1222	0.41076	29.0412	0.657947	191.845	40.135	27.1222	0.41076
JG-AGUA2-23	460.741	21809.7	2.60629	21.2295	2.14523	0.027399	3.13898	0.00422048	2.29155	0.73003		27.1497	0.62084	27.4462	0.849991	54.5099	51.1646	27.1497	0.62084
JG-AGUA2-85	39.6344	181.817	0.728311	25.5136	18.4629	0.0272887	18.7998	0.00505176	3.54321	0.18847		32.4838	1.14807	27.3371	5.0708	NA	NA	32.4838	1.14807
JG-AGUA2-92	269.408	1918.3	1.68555	24.5629	2.52999	0.0337101	3.3006	0.00600795	2.11969	0.642214		38.6138	0.816048	33.6643	1.09291	NA	NA	38.6138	0.816048
JG-AGUA2-2	2340.41	3004.73	0.596946	15.1698	1.71709	0.0685986	3.54635	0.00755062	3.10293	0.874965		48.4916	1.49902	67.3687	2.3116	803.831	35.9584	48.4916	1.49902
JG-AGUA2-34	1355.46	26865.2	0.676271	21.0493	1.15806	0.0833861	2.42812	0.0127356	2.13416	0.878937		81.5805	1.73009	81.3234	1.89763	74.8024	27.5343	81.5805	1.73009
JG-AGUA2-100	920.926	61210.2	1.54731	20.6931	0.862976	0.0876079	2.21236	0.013154	2.03711	0.920785		84.2431	1.70496	85.2726	1.80949	115.244	20.3615	84.2431	1.70496
JG-AGUA2-45	322.182	4358.74	3.27044	21.7956	1.69411	0.0836784	2.65699	0.0132333	2.04685	0.770364		84.748	1.72331	81.5974	2.08321	NA	NA	84.748	1.72331
JG-AGUA2-64	1158.9	14179.7	1.1393	21.0008	1.16403	0.0869556	2.05854	0.0132502	1.69783	0.824772		84.8551	1.43125	84.6634	1.67215	80.2726	27.6424	84.8551	1.43125
JG-AGUA2-48	999.07	31229.4	1.95307	20.4464	1.16485	0.0903486	2.40719	0.0134038	2.10658	0.875121		85.8322	1.79614	87.8281	2.02534	143.443	27.3183	85.8322	1.79614
JG-AGUA2-54	536.29	2430.48	1.19471	23.685	1.21984	0.0791985	2.51521	0.0136106	2.1996	0.874522		87.1479	1.90401	77.3911	1.87422	NA	NA	87.1479	1.90401
JG-AGUA2-19	997.364	94232.9	2.42	20.8455	1.10033	0.0911793	3.5228	0.013791	3.34655	0.949969		88.2951	2.9347	88.6013	2.98895	97.9115	26.0363	88.2951	2.9347
JG-AGUA2-102	244.591	3321.72	2.53827	22.3796	2.5834	0.0849878	3.40145	0.0138006	2.21267	0.650508		88.356	1.94169	82.8235	2.70537	NA	NA	88.356	1.94169
JG-AGUA2-106	940.901	23662.5	1.58515	21.1838	1.15374	0.0901802	2.38602	0.0138613	2.08853	0.875321		88.7419	1.8407	87.6712	2.00409	59.6756	27.5075	88.7419	1.8407
JG-AGUA2-80	607.811	22952.1	1.52059	21.2122	1.11149	0.0920172	1.88677	0.0141626	1.52463	0.808063		90.6575	1.37252	89.3808	1.61432	56.4728	26.4972	90.6575	1.37252
JG-AGUA2-62	2203.39	52517.9	0.957424	21.0064	1.02421	0.0930008	2.5805	0.0141751	2.36854	0.91786		90.7369	2.13409	90.2949	2.22947	79.6406	24.3091	90.7369	2.13409
JG-AGUA2-76	274.607	4871.83	0.850376	22.2879	2.3517	0.0877176	3.47546	0.0141855	2.55896	0.736295		90.8028	2.30732	85.375	2.84586	NA	NA	90.8028	2.30732
JG-AGUA2-6	863.3	29669.1	2.37799	20.8405	1.23556	0.0948157	2.56729	0.0143376	2.25042	0.876573		91.7698	2.05057	91.9795	2.25759	98.4301	29.2598	91.7698	2.05057
JG-AGUA2-88	658.194	32438.5	1.98622	20.6488	1.03268	0.09655	2.76642	0.0144655	2.56645	0.927714		92.5828	2.35911	93.5867	2.47328	120.257	24.3245	92.5828	2.35911
JG-AGUA2-42	743.645	6033.48	1.42488	21.6331	1.27363	0.0926949	3.0764	0.01455	2.80038	0.910276		93.1194	2.58895	90.0107	2.64991	9.39445	30.6462	93.1194	2.58895
JG-AGUA2-21	524.187	14742.8	1.64366	21.111	1.19534	0.0950906	2.47282	0.0145658	2.16471	0.875403		93.2201	2.00343	92.2345	2.18027	67.8708	28.4304	93.2201	2.00343
JG-AGUA2-99	127.565	4953.41	2.60266	21.7197	2.5594	0.0927115	3.54996	0.0146108	2.46003	0.692973		93.5061	2.28367	90.0261	3.05832	NA	NA	93.5061	2.28367
JG-AGUA2-49	589.405	45187.3	1.31621	20.7434	1.16832	0.0971986	2.49723	0.0146294	2.20708	0.88381		93.6242	2.05143	94.1871	2.24628	109.518	27.6117	93.6242	2.05143
JG-AGUA2-17	685.868	20826.2	1.55647	21.2451	1.33891	0.0951762	2.93683	0.0146715	2.61386	0.890029		93.8914	2.43641	92.3139	2.59152	52.7667	31.9307	93.8914	2.43641
JG-AGUA2-22	569.398	6688.06	1.50766	21.6721	2.07317	0.0933038	2.82681	0.0146719	1.92167	0.679803		93.8943	1.79127	90.5764	2.44955	5.05321	49.9284	93.8943	1.79127
JG-AGUA2-70	713.235	13847.3	1.8535	20.7571	1.238	0.098461	2.73147	0.0148292	2.43481	0.891391		94.8936	2.29355	95.3547	2.48603	107.927	29.2652	94.8936	2.29355
JG-AGUA2-28	561.388	3489.17	1.74892	22.573	1.3208	0.090684	2.64778	0.0148528	2.29482	0.866698		95.0432	2.16507	88.1404	2.23534	NA	NA	95.0432	2.16507
JG-AGUA2-50	768.656	48651.8	1.70626	20.5107	0.999204	0.0998885	2.19037	0.0148657	1.94918	0.889887		95.125	1.84055	96.6735	2.01983	136.08	23.4795	95.125	1.84055
JG-AGUA2-68	360.407	6064.57	2.30022	22.0111	1.43392	0.0932516	2.57458	0.0148931	2.1383	0.830544		95.2992	2.02279	90.5278	2.22983	NA	NA	95.2992	2.02279
JG-AGUA2-40	234.684	20362.2	1.62241	20.9753	1.9703	0.0982748	2.87097	0.0149568	2.08816	0.727334		95.7036	1.98368	95.1826	2.6085	83.1587	46.7676	95.7036	1.98368
JG-AGUA2-79	155.312	3360.53	1.88205	23.5528	5.57991	0.0877362	6.05865	0.0149937	2.36046	0.389601		95.9381	2.24781	85.3924	4.96209	NA	NA	95.9381	2.24781
JG-AGUA2-82	698.762	6814.28	1.82061	22.0208	1.03719	0.0942575	2.08975	0.0150604	1.8142	0.868138		96.3617	1.73519	91.4617	1.82777	NA	NA	96.3617	1.73519
JG-AGUA2-39	451.816	2295.9	1.35939	17.4983	1.46803	0.118765	2.13581	0.015079	1.55132	0.726337		96.4799	1.48557	113.952	2.3022	497.284	32.3497	96.4799	1.48557
JG-AGUA2-4	714.719	4591.73	1.96564	21.9545	3.75603	0.0947435	4.41807	0.0150925	2.32629	0.526538		96.5657	2.22965	91.9126	3.88242	NA	NA	96.5657	2.22965
JG-AGUA2-71	1013.42	52835.2	2.45452	21.0145	1.25109	0.098988	2.63703	0.0150935	2.32135	0.880291		96.5717	2.22506	95.8418	2.41176	78.726	29.7257	96.5717	2.22506
JG-AGUA2-33	367.297	3546.06	3.50118	22.1415	1.56944	0.0943456	2.89258	0.0151571	2.42978	0.840007		96.9759	2.33867	91.5434	2.53211	NA	NA	96.9759	2.33867
JG-AGUA2-14	499.388	33915	1.37303	20.79	1.33328	0.100823	2.65494	0.015209	2.29588	0.864759		97.3054	2.21724	97.5353	2.46903	104.21	31.5015	97.3054	2.21724
JG-AGUA2-35	465.146	13260	2.94586	20.7222	1.53577	0.101437	2.55583	0.0152517	2.04296	0.799333		97.5767	1.97844	98.1019	2.39001	111.903	36.2583	97.5767	1.97844
JG-AGUA2-27	250.411	1792.99	2.08304	25.6201	10.9376	0.082048	11.1109	0.0152523	1.9549	0.175944		97.5806	1.89323	80.0686	8.55483	NA	NA	97.5806	1.89323
JG-AGUA2-93	1088.84	42995.7	1.61385	20.3409	1.08151	0.103858	2.26173	0.0153285	1.98639	0.878263		98.0644	1.9332	100.332	2.16072	155.563	25.3098	98.0644	1.9332
JG-AGUA2-56	332.479	3012.73	1.54003	22.0554	3.38179	0.0958245	4.0473	0.0153349	2.22355	0.54939		98.1046	2.16489	92.9148	3.59363	NA	NA	98.1046	2.16489
JG-AGUA2-109	441.738	4904.16	1.57858	22.3604	1.08707	0.0945626	1.72683	0.0153422	1.34173	0.776987		98.1512	1.30695	91.7448	1.51482	NA	NA	98.1512	1.30695
JG-AGUA2-94	271.578	3034.66	2.42101	22.6751	2.74042	0.0935442	3.33325	0.0153905	1.89754	0.569275		98.4581	1.85408	90.7996	2.89521	NA	NA	98.4581	1.85408
JG-AGUA2-91	363.266	10210.7	2.33423	20.8601	1.48647	0.101711	2.49954	0.0153948	2.0095	0.803949		98.485	1.96402	98.355	2.34311	96.2207	35.1902	98.485	1.96402
JG-AGUA2-58	868.823	8287.92	2.05579	21.4797	1.02067	0.0988772	2.14492	0.0154103	1.8865	0.879523		98.5836	1.84564	95.7394	1.95969	26.5156	24.4922	98.5836	1.84564
JG-AGUA2-72	454.667	17589	2.11517	20.9153	1.31848	0.103276	2.50009	0.0156729	2.12416	0.849634		100.251	2.11301	99.7958	2.3763	89.9527	31.2286	100.251	2.11301
JG-AGUA2-104	1082.06	57093	1.80548	21.0514	1.22537	0.102682	2.51961	0.0156843	2.20157	0.873773		100.323	2.19158	99.2492	2.38237	74.5944	29.1214	100.323	2.19158
JG-AGUA2-11	548.54	2280.14	3.12181	22.8365	1.52804	0.0950991	3.01149	0.0157578	2.59503	0.86171		100.789	2.59517	92.2424	2.65544	NA	NA	100.789	2.59517
JG-AGUA2-96	255.725	3508.74	2.14142	22.2192	2.48142	0.0981781	3.39694	0.0158282	2.31987	0.682928		101.236	2.3302	95.0932	3.08362	NA	NA	101.236	2.3302
JG-AGUA2-18	1439.59	32255.3	1.06593	20.5843	0.978751	0.105993	2.17369	0.0158308	1.94087	0.892892		101.253	1.94983	102.294	2.11522	127.662	23.0446	101.253	1.94983
JG-AGUA2-95	878.409	38165.8	2.59555	20.9526	1.1404	0.104602	2.44775	0.0159025	2.16587	0.884839		101.708	2.18557	101.016	2.3536	85.7669	27.0371	101.708	2.18557
JG-AGUA2-75	560.446	9082.15	1.65348	19.5718	2.55373	0.112133	3.32646	0.0159241	2.13163	0.640808		101.844	2.15388	107.915	3.40559	245.043	58.8306	101.844	2.15388
JG-AGUA2-98	727.802	165327	2.31489	20.8173	1.11925	0.105826	2.6682	0.0159847	2.4221	0.907765		102.229	2.45656	102.14	2.59272	101.089	26.494	102.229	2.45656
JG-AGUA2-43	417.262	12507.6	2.68854	20.8368	1.31167	0.105883	1.93394	0.0160083	1.42113	0.73484		102.379	1.44345	102.192	1.88014	98.8718	31.0315	102.379	1.44345
JG-AGUA2-47	782.913	25346.7	3.03174	20.9535	1.20513	0.10531	2.60633	0.0160109	2.31097	0.886678		102.395	2.34763	101.667	2.52143	85.6728	28.5985	102.395	2.34763
JG-AGUA2-63	400.222	7207.43	2.76017	21.1606	1.34694	0.104695	2.48111	0.0160747	2.08366	0.839811		102.8	2.12502	101.101	2.3876	62.2583	32.0721	102.8	2.12502
JG-AGUA2-37	505.479	108381	1.83284	20.4654	1.11586	0.10859	2.11531	0.0161249	1.79705	0.849546		103.119	1.83835	104.675	2.10389	141.248	26.1716	103.119	1.83835
JG-AGUA2-103	180.132	3014.3	2.27816	22.3796	5.79843	0.0993701	6.26747	0.016136	2.37894	0.37957		103.189	2.43527	96.1947	5.75226	NA	NA	103.189	2.43527
JG-AGUA2-60	307.401	4356.64	3.29713	22.5077	1.67193	0.0997577	3.21699	0.0162917	2.74839	0.854338		104.177	2.84017	96.5526	2.96299	NA	NA	104.177	2.84017
JG-AGUA2-12	203.238	4875.94	2.787	21.2197	2.76313	0.106596	3.58235	0.0164123	2.27999	0.63645		104.942	2.37329	102.847	3.50391	55.5984	65.9068	104.942	2.37329
JG-AGUA2-10	280.021	5477.27	1.97396	21.7451	2.06252	0.104159	3.03952	0.0164342	2.23264	0.734538		105.08	2.32705	100.609	2.9114	NA	NA	105.08	2.32705
JG-AGUA2-53	212.671	16762.6	1.91123	21.0585	2.2338	0.108226	3.18382	0.0165366	2.26867	0.712563		105.73	2.37911	104.342	3.15707	73.7889	53.1228	105.73	2.37911
JG-AGUA2-101	799.754	13015.5	11.9469	21.2265	1.27083	0.107788	2.44394	0.016601	2.08754	0.85417		106.139	2.19755	103.94	2.41454	54.848	30.3315	106.139	2.19755
JG-AGUA2-57	636.521	35835.9	2.80796	20.6909	1.10507	0.110605	2.65035	0.0166051	2.40897	0.908928		106.164	2.53652	106.518	2.68008	115.499	26.0659	106.164	2.53652
JG-AGUA2-81	223.536	6563.07	2.73709	20.0804	2.24938	0.114213	3.09828	0.0166409	2.13064	0.687685		106.391	2.24821	109.812	3.22478	185.643	52.3828	106.391	2.24821
JG-AGUA2-32	344.623	7426.6	2.1639	21.3142	1.47654	0.109241	2.54101	0.0168944	2.06798	0.813844		107.998	2.21479	105.271	2.54095	44.9843	35.2808	107.998	2.21479
JG-AGUA2-3	866.937	17090.5	1.13385	20.968	1.13587	0.113085	2.40933	0.0172049	2.12477	0.881894		109.966	2.31672	108.784	2.48545	83.9774	26.9505	109.966	2.31672
JG-AGUA2-9	244.655	10567.3	1.89076	21.0712	1.73515	0.113915	3.02701	0.0174164	2.48033	0.819399		111.307	2.73708	109.541	3.14322	72.3696	41.2611	111.307	2.73708
JG-AGUA2-86	171.21	3296.89	1.5613	22.7546	2.27268	0.107163	2.94526	0.0176931	1.87336	0.63606		113.059	2.09955	103.367	2.89461	NA	NA	113.059	2.09955
JG-AGUA2-25	546.366	8582.77	1.16533	21.2475	1.41136	0.115573	3.11411	0.0178177	2.77593	0.891401		113.849	3.13262	111.051	3.27585	52.4887	33.6851	113.849	3.13262
JG-AGUA2-74	148.049	5912	0.900079	21.6762	1.94183	0.113292	2.69847	0.0178185	1.87377	0.694384		113.854	2.11464	108.973	2.7883	4.59763	46.7689	113.854	2.11464
JG-AGUA2-31	174.506	14472.9	2.67196	21.1114	1.42471	0.116507	2.44787	0.0178467	1.99055	0.813175		114.033	2.24992	111.901	2.59365	67.8287	33.9116	114.033	2.24992
JG-AGUA2-67	362.942	3004.3	2.59388	23.2732	4.69005	0.105959	5.3107	0.017893	2.49138	0.469125		114.326	2.82318	102.262	5.16636	NA	NA	114.326	2.82318
JG-AGUA2-44	120.623	1036.56	1.41334	30.7807	2.40338	0.0801575	3.17817	0.0179024	2.07956	0.654326		114.385	2.35773	78.293	2.39478	NA	NA	114.385	2.35773
JG-AGUA2-69	891.67	5555.54	1.7257	14.1851	6.44466	0.176211	6.80552	0.0181364	2.18665	0.321305		115.867	2.51098	164.795	10.3527	942.844	132.154	115.867	2.51098
JG-AGUA2-51	96.8114	1962.5	1.47833	24.3279	3.50279	0.103566	4.21192	0.0182813	2.33897	0.555321		116.785	2.70696	100.062	4.01356	NA	NA	116.785	2.70696
JG-AGUA2-87	100.028	2302.56	2.58378	24.2268	2.98833	0.104138	4.0597	0.0183059	2.74792	0.676877		116.94	3.18445	100.588	3.88786	NA	NA	116.94	3.18445
JG-AGUA2-13	489.338	8730.77	1.36232	18.8757	2.40966	0.134347	3.17711	0.0184	2.07064	0.651739		117.536	2.4117	127.996	3.82072	327.869	54.6899	117.536	2.4117
JG-AGUA2-83	141.914	16450.3	2.85913	20.8785	1.97036	0.121652	3.09655	0.0184291	2.38879	0.771436		117.72	2.78658	116.568	3.41012	94.1379	46.6662	117.72	2.78658
JG-AGUA2-16	350.183	4692.49	4.1794	21.967	2.89096	0.115699	3.73576	0.0184412	2.36606	0.633355		117.797	2.76183	111.166	3.93364	NA	NA	117.797	2.76183
JG-AGUA2-30	103.712	18480	0.937378	19.6624	2.44925	0.129945	3.19074	0.0185389	2.045	0.640917		118.415	2.39949	124.048	3.72585	234.44	56.5526	118.415	2.39949
JG-AGUA2-46	145.787	11508.1	2.47937	20.8885	2.04265	0.123032	3.16899	0.0186472	2.42282	0.764541		119.1	2.8591	117.817	3.52515	93.0042	48.3797	119.1	2.8591
JG-AGUA2-108	427.665	36907.3	2.42616	20.8662	1.28105	0.124311	2.31308	0.018821	1.92595	0.832632		120.2	2.29354	118.973	2.59685	95.5546	30.3431	120.2	2.29354
JG-AGUA2-5	506.028	14484.4	1.05938	20.0196	1.2314	0.12968	2.75823	0.0188373	2.46809	0.894811		120.303	2.94166	123.81	3.21499	192.734	28.6348	120.303	2.94166
JG-AGUA2-89	169.382	9071.85	1.36453	21.4533	1.89432	0.123907	2.97129	0.0192876	2.28913	0.770417		123.152	2.79235	118.608	3.32614	29.4123	45.3877	123.152	2.79235
JG-AGUA2-90	284.908	29318	2.20178	20.9147	1.48119	0.12839	2.57529	0.0194837	2.1067	0.818045		124.392	2.59545	122.65	2.97529	90.0502	35.0815	124.392	2.59545
JG-AGUA2-55	209.352	2372.5	1.55475	22.4	3.14501	0.122585	3.84085	0.0199238	2.20477	0.574032		127.174	2.77642	117.412	4.25869	NA	NA	127.174	2.77642
JG-AGUA2-8	718.398	177798	2.30974	20.0663	1.22511	0.139439	2.75471	0.0203021	2.46729	0.895663		129.565	3.16482	132.544	3.42294	187.268	28.5035	129.565	3.16482
JG-AGUA2-24	293.864	20188.4	7.56046	14.4453	2.15095	0.198349	6.82296	0.0207896	6.47505	0.949008		132.644	8.50101	183.728	11.4675	905.478	44.3286	132.644	8.50101
JG-AGUA2-105	145.676	16176.2	1.60015	20.5613	1.47686	0.145376	2.38917	0.0216885	1.87804	0.786062		138.319	2.57001	137.821	3.0791	130.296	34.7175	138.319	2.57001
JG-AGUA2-59	447.965	16711.2	1.05717	20.7924	1.23831	0.150933	2.78871	0.0227707	2.4987	0.896004		145.143	3.58617	142.735	3.71338	103.935	29.257	145.143	3.58617
JG-AGUA2-38	309.506	6406.39	1.0355	21.0527	1.45646	0.149821	2.18622	0.0228858	1.63043	0.745774		145.869	2.35158	141.754	2.89246	74.4562	34.6059	145.869	2.35158
JG-AGUA2-52	244.261	4893.4	2.6802	21.7225	1.37001	0.151267	3.02567	0.0238418	2.69773	0.891614		151.891	4.0497	143.03	4.03665	NA	NA	151.891	4.0497
JG-AGUA2-73	161.392	4254.85	1.72279	21.5669	2.56997	0.160304	3.14844	0.0250853	1.81878	0.577677		159.715	2.86918	150.969	4.41673	16.7449	61.7356	159.715	2.86918
JG-AGUA2-84	380.826	33894	2.7419	19.5657	1.29804	0.18285	2.35619	0.0259584	1.9664	0.834568		165.204	3.20729	170.51	3.69833	245.772	29.8799	165.204	3.20729
JG-AGUA2-26	140.62	2351.31	0.914024	23.1908	5.52412	0.15507	6.08171	0.0260934	2.54387	0.418283		166.052	4.17021	146.379	8.29057	NA	NA	166.052	4.17021
JG-AGUA2-7	886.119	23580.8	1.23974	20.4472	0.960293	0.179616	2.31632	0.026648	2.10789	0.910015		169.535	3.52703	167.73	3.58125	143.336	22.5309	169.535	3.52703
JG-AGUA2-1	328.242	11588.8	1.18156	20.6956	1.09259	0.185898	2.38124	0.0279152	2.11579	0.888523		177.487	3.70402	173.123	3.7902	114.913	25.774	177.487	3.70402
JG-AGUA2-15	105.121	11271.7	2.13912	14.3461	1.1384	1.44525	2.45307	0.150441	2.17292	0.885798		903.433	18.3174	907.901	14.7228	919.7	23.4058	919.7	23.4058
JG-AGUA2-110	126.538	31293.7	1.27759	11.0504	0.910318	3.03735	2.23545	0.243534	2.0417	0.91333		1405.04	25.7759	1417.06	17.0779	1435.97	17.3611	1435.97	17.3611
JG-AGUA2-66	124.78	243806	1.50125	11.0437	0.736084	3.13148	2.09187	0.25093	1.95808	0.936045		1443.27	25.3204	1440.46	16.1007	1437.12	14.0359	1437.12	14.0359
JG-AGUA2-107	100.943	64877.3	1.16625	9.97442	0.994888	3.95113	2.31781	0.285954	2.09342	0.903192		1621.28	30.0089	1624.22	18.7834	1628.83	18.4949	1628.83	18.4949
JG-AGUA2-78	358.536	38270.9	2.16131	9.23024	0.649508	4.56919	1.28905	0.306013	1.11346	0.863782		1721.06	16.8185	1743.67	10.739	1771.67	11.8575	1771.67	11.8575
JG-AGUA2-20	76.5527	23561.6	1.86447	9.00615	0.822129	5.08559	2.39965	0.332329	2.25442	0.93948		1849.66	36.2506	1833.71	20.3645	1816.41	14.927	1816.41	14.927
JG-AGUA2-29	57.8721	37095.9	0.445199	8.1432	0.857928	6.07339	2.54473	0.358851	2.39575	0.941455		1976.72	40.7856	1986.43	22.1893	1997.31	15.2448	1997.31	15.2448
JG-AGUA2-36	1183.51	274757	4.39957	7.15998	1.03874	7.71828	3.04216	0.400977	2.85933	0.939901		2173.54	52.7571	2198.73	27.3531	2223.05	17.9964	2223.05	17.9964
JG-AGUA2-41	134.637	31565.8	1.04387	5.85427	0.883561	10.6554	2.07816	0.452616	1.88098	0.905116		2406.87	37.7821	2493.54	19.2932	2565.63	14.7765	2565.63	14.7765
CRN-1 (SG-2)
SAG-sg2-88	469.125	3862	3.17488	24.6011	14.5815	0.0390384	14.6605	0.00696539	1.52	0.10368		44.7461	0.677786	38.8848	5.593	-309.57	375.004	44.7461	0.677786
SAG-sg2-19	694.624	6564	1.59339	21.9701	5.83236	0.0462898	6.32993	0.0073759	2.46	0.38863		47.3736	1.16112	45.9464	2.84357	-27.9034	141.435	47.3736	1.16112
SAG-sg2-5	1036.11	3494	2.17268	18.9003	2.58816	0.0858716	3.23453	0.0117711	1.94	0.599778		75.4383	1.45497	83.6503	2.59725	324.91	58.7674	75.4383	1.45497
SAG-sg2-67	929.981	12380	2.23632	21.0355	2.02785	0.0887622	2.63975	0.0135419	1.69	0.640212		86.7109	1.4556	86.3496	2.18519	76.3489	48.173	86.7109	1.4556
SAG-sg2-97	511.62	4824	1.67445	21.2084	3.0699	0.0895586	3.39512	0.0137757	1.45	0.427084		88.1977	1.27016	87.0921	2.83362	56.8747	73.1998	88.1977	1.27016
SAG-sg2-6	1215.91	8186	1.36531	20.9569	3.13668	0.091661	3.52119	0.0139319	1.6	0.454392		89.1907	1.41723	89.0495	3.00205	85.2882	74.4221	89.1907	1.41723
SAG-sg2-49	501.588	7514	3.28136	21.0537	4.79087	0.0920174	4.90891	0.0140507	1.07	0.217971		89.9462	0.955741	89.3809	4.20008	74.3254	113.906	89.9462	0.955741
SAG-sg2-8	821.122	10144	1.69674	21.4305	3.71175	0.0909524	3.86849	0.0141366	1.09	0.281764		90.4924	0.979476	88.3902	3.27477	31.9839	88.9543	90.4924	0.979476
SAG-sg2-95	766.556	11646	1.5759	21.0843	5.34471	0.0925028	5.79513	0.0141453	2.24	0.386531		90.5476	2.01409	89.8321	4.98229	70.8803	127.178	90.5476	2.01409
SAG-sg2-96	1693.64	24010	1.22727	20.7075	1.65336	0.0946972	1.9586	0.0142221	1.05	0.536098		91.0357	0.949157	91.8696	1.72036	113.59	38.9967	91.0357	0.949157
SAG-sg2-57	694.201	15566	1.98682	20.6952	4.29309	0.0949847	4.3616	0.0142568	0.77	0.176541		91.2562	0.697723	92.1363	3.8417	114.963	101.328	91.2562	0.697723
SAG-sg2-25	506.692	5610	2.1196	19.9421	5.20145	0.0992385	5.40247	0.0143533	1.46	0.270247		91.8693	1.33178	96.0732	4.95238	201.702	120.831	91.8693	1.33178
SAG-sg2-42	154.327	3022	2.5683	24.4078	14.9488	0.0816471	15.6853	0.0144534	4.75	0.30283		92.5054	4.36263	79.6923	12.0226	-289.413	383.012	92.5054	4.36263
SAG-sg2-59	451.591	13730	1.91123	20.6943	3.42865	0.0965422	3.52303	0.0144899	0.81	0.229916		92.7377	0.745798	93.5795	3.14948	115.07	80.9011	92.7377	0.745798
SAG-sg2-7	779.696	6348	2.10312	21.1297	3.14611	0.095007	3.41959	0.0145596	1.34	0.39186		93.1802	1.23963	92.157	3.01262	65.7597	74.9114	93.1802	1.23963
SAG-sg2-71	428.897	2624	1.99409	18.7866	7.83366	0.107093	8.30234	0.0145918	2.75	0.331232		93.3851	2.54958	103.303	8.15488	338.57	177.672	93.3851	2.54958
SAG-sg2-52	484.661	11446	2.72245	21.1161	5.98707	0.0956979	6.07844	0.014656	1.05	0.172742		93.7927	0.977694	92.7974	5.39061	67.2596	142.578	93.7927	0.977694
SAG-sg2-68	690.806	3808	1.1678	20.6275	4.86176	0.0985342	5.21984	0.0147412	1.9	0.363996		94.3343	1.7793	95.4224	4.75405	122.682	114.572	94.3343	1.7793
SAG-sg2-77	634.156	6918	1.84196	21.0397	4.38062	0.0970043	5.23158	0.0148023	2.86	0.54668		94.7223	2.68925	94.0073	4.69731	75.8786	104.111	94.7223	2.68925
SAG-sg2-4	526.67	4356	1.55635	21.8197	9.61317	0.0941986	9.65156	0.0149071	0.860001	0.0891048		95.388	0.814298	91.407	8.43695	-11.2928	232.668	95.388	0.814298
SAG-sg2-65	348.363	9200	1.85986	20.2178	2.77627	0.102167	3.16035	0.014981	1.51	0.477796		95.8577	1.43674	98.7744	2.9746	169.739	64.8634	95.8577	1.43674
SAG-sg2-31	505.997	8118	2.77605	21.5877	4.78424	0.0960865	4.84423	0.0150442	0.76	0.156888		96.2587	0.726132	93.1575	4.31196	14.4404	115.06	96.2587	0.726132
SAG-sg2-2	563.143	8744	1.7243	20.6425	2.88327	0.10058	3.09316	0.0150583	1.12	0.36209		96.3482	1.07108	97.3119	2.87028	121.013	67.9266	96.3482	1.07108
SAG-sg2-56	334.416	6896	1.72481	21.811	6.13866	0.0953562	6.86353	0.0150843	3.07	0.447292		96.5132	2.94089	92.4807	6.06703	-10.3276	148.353	96.5132	2.94089
SAG-sg2-76	109.235	2262	4.19909	25.838	20.1897	0.0807563	21.1291	0.0151333	6.23	0.294854		96.8249	5.98712	78.8558	16.0323	-436.819	534.933	96.8249	5.98712
SAG-sg2-74	514.248	6662	1.6797	21.2578	5.4537	0.0985256	5.66426	0.0151903	1.53	0.270115		97.1864	1.4758	95.4144	5.1584	51.3314	130.247	97.1864	1.4758
SAG-sg2-60	798.54	17324	2.13215	20.6157	2.29586	0.101654	2.99932	0.0151992	1.93	0.64348		97.2429	1.8627	98.3015	2.81016	124.032	54.0593	97.2429	1.8627
SAG-sg2-15	534.602	6558	2.86383	20.3376	5.4	0.103652	5.73118	0.0152889	1.92	0.335009		97.813	1.86383	100.142	5.46544	155.947	126.516	97.813	1.86383
SAG-sg2-44	111.432	8722	1.99709	26.1655	29.857	0.0806622	29.9372	0.0153072	2.19	0.0731532		97.9292	2.12844	78.7673	22.6931	-470.025	804.637	97.9292	2.12844
SAG-sg2-80	464.955	2386	2.11902	18.9083	16.225	0.112638	16.3159	0.0154467	1.72	0.105419		98.8148	1.68666	108.376	16.773	323.918	370.584	98.8148	1.68666
SAG-sg2-30	843.696	15394	3.25113	21.1123	2.03658	0.101019	2.36382	0.0154681	1.2	0.507652		98.9505	1.17834	97.7166	2.20219	67.7317	48.4932	98.9505	1.17834
SAG-sg2-43	278.923	6878	2.57691	21.8416	5.27005	0.0978092	5.41396	0.0154939	1.24	0.229037		99.1145	1.21962	94.752	4.8978	-13.7079	127.436	99.1145	1.21962
SAG-sg2-85	546.24	14534	2.5024	21.1162	2.5816	0.101295	2.76135	0.0155133	0.98	0.354899		99.2372	0.965077	97.971	2.57891	67.2401	61.4623	99.2372	0.965077
SAG-sg2-41	1042.01	18924	2.24812	19.991	5.24276	0.107299	5.29756	0.015557	0.76	0.143462		99.5149	0.750506	103.491	5.21241	196.065	121.933	99.5149	0.750506
SAG-sg2-58	244.535	5930	3.08176	21.2252	5.58199	0.101252	5.69522	0.0155867	1.13	0.198412		99.7035	1.11798	97.9315	5.31694	54.9967	133.246	99.7035	1.11798
SAG-sg2-1	869.625	6852	4.20195	20.8401	2.12971	0.103838	3.2994	0.0156948	2.52	0.763774		100.389	2.51021	100.313	3.1515	98.512	50.4096	100.389	2.51021
SAG-sg2-21	723.589	12764	2.77618	20.9029	1.84539	0.103529	2.83337	0.0156953	2.15	0.758815		100.393	2.14172	100.029	2.69907	91.3976	43.7257	100.393	2.14172
SAG-sg2-27	393.239	7242	1.68462	21.5693	4.99406	0.100629	5.12253	0.015742	1.14	0.222546		100.689	1.13893	97.3569	4.75554	16.4717	120.062	100.689	1.13893
SAG-sg2-62	447.461	7128	1.9926	20.5483	3.42123	0.107022	3.46676	0.0159495	0.56	0.161534		102.006	0.566738	103.237	3.40308	131.743	80.4601	102.006	0.566738
SAG-sg2-12	104.97	4408	1.94271	20.4298	21.7285	0.108598	21.771	0.016091	1.36	0.0624684		102.904	1.38838	104.682	21.6581	145.323	514.934	102.904	1.38838
SAG-sg2-72	335.015	8344	2.69198	22.9959	10.6265	0.0976381	11.0638	0.0162842	3.08	0.278385		104.129	3.18142	94.5938	9.99331	-139.678	263.719	104.129	3.18142
SAG-sg2-3	91.5979	496	1.00004	15.6628	35.7186	0.143766	35.7262	0.0163314	0.740031	0.0207139		104.428	0.766576	136.392	45.6276	736.543	779.993	104.428	0.766576
SAG-sg2-35	575.756	9706	2.35633	18.8186	7.92659	0.119702	8.3145	0.0163376	2.51	0.301882		104.468	2.60101	114.802	9.02561	334.724	179.886	104.468	2.60101
SAG-sg2-87	540.058	9758	3.20255	20.0737	5.21052	0.112231	5.28939	0.0163395	0.91	0.172042		104.48	0.943105	108.004	5.41947	186.41	121.386	104.48	0.943105
SAG-sg2-66	1068.38	34280	3.45087	20.7537	2.62976	0.10888	2.67687	0.0163887	0.5	0.186785		104.792	0.519724	104.941	2.66884	108.303	62.1048	104.792	0.519724
SAG-sg2-50	224.27	6710	1.71933	21.4024	6.16898	0.105751	6.52961	0.0164152	2.14	0.327738		104.96	2.22795	102.071	6.34089	35.1066	147.809	104.96	2.22795
SAG-sg2-34	224.949	4130	1.57943	22.417	9.94317	0.101504	10.0572	0.0165029	1.51	0.150142		105.516	1.58032	98.1636	9.41055	-76.9383	243.707	105.516	1.58032
SAG-sg2-11	224.382	4724	2.76922	22.2302	7.14899	0.102438	7.18718	0.016516	0.74	0.102961		105.599	0.77507	99.0247	6.78116	-56.5042	174.357	105.599	0.77507
SAG-sg2-9	714.674	10288	1.87592	21.1064	1.9658	0.108629	3.27548	0.0166288	2.62	0.799882		106.314	2.76259	104.711	3.25887	68.3962	46.8025	106.314	2.76259
SAG-sg2-23	152.897	3736	2.39677	22.1958	8.51205	0.103499	8.97332	0.0166611	2.84	0.316494		106.52	3.0003	100.001	8.54587	-52.7332	207.551	106.52	3.0003
SAG-sg2-61	257.811	7096	2.5134	20.2381	9.18646	0.113613	9.27799	0.0166762	1.3	0.140117		106.615	1.3746	109.265	9.61151	167.392	214.977	106.615	1.3746
SAG-sg2-63	315.005	7080	2.32859	18.3054	28.8778	0.126022	30.2687	0.0167311	9.07	0.29965		106.963	9.62153	120.517	34.4104	397.038	659.837	106.963	9.62153
SAG-sg2-75	208.837	4770	1.89657	21.441	7.26971	0.107667	7.30829	0.0167427	0.750001	0.102623		107.037	0.796147	103.829	7.21316	30.8141	174.394	107.037	0.796147
SAG-sg2-45	776.996	10678	2.67257	20.677	3.9661	0.112203	4.00544	0.0168263	0.56	0.13981		107.567	0.597377	107.978	4.103	117.067	93.5527	107.567	0.597377
SAG-sg2-73	121.369	2794	3.35782	22.2371	13.9571	0.104697	14.044	0.0168854	1.56	0.11108		107.941	1.66987	101.103	13.5156	-57.2632	341.509	107.941	1.66987
SAG-sg2-22	137.8	2770	1.99395	23.7304	13.8304	0.098961	13.8733	0.0170321	1.09	0.0785684		108.871	1.17673	95.8169	12.6857	-218.133	349.129	108.871	1.17673
SAG-sg2-14	105.465	2882	2.11845	22.4186	9.66309	0.104867	9.79466	0.0170508	1.6	0.163354		108.99	1.72918	101.259	9.43972	-77.1066	236.822	108.99	1.72918
SAG-sg2-69	252.236	5908	2.51296	21.017	7.69684	0.111999	7.91372	0.0170719	1.84	0.232508		109.124	1.99098	107.792	8.09336	78.4454	183.012	109.124	1.99098
SAG-sg2-13	470.331	18786	3.26044	20.4648	4.46921	0.116177	4.66007	0.0172436	1.32	0.283258		110.212	1.44243	111.6	4.92508	141.337	104.969	110.212	1.44243
SAG-sg2-10	178.683	2748	1.09059	23.2141	13.0399	0.102701	13.0494	0.0172913	0.500002	0.038316		110.514	0.547864	99.2669	12.3413	-163.126	325.486	110.514	0.547864
SAG-sg2-47	650.922	18852	2.83241	20.7429	3.27547	0.115167	3.39162	0.017326	0.88	0.259463		110.734	0.966137	110.681	3.55655	109.573	77.347	110.734	0.966137
SAG-sg2-99	400.995	12706	2.06543	21.4575	4.19547	0.112625	4.32977	0.0175272	1.07	0.247127		112.009	1.18814	108.364	4.45024	28.9982	100.59	112.009	1.18814
SAG-sg2-16	136.402	2014	2.64162	21.5537	18.7511	0.112963	18.7921	0.0176586	1.24	0.0659853		112.841	1.38706	108.672	19.3692	18.2595	453.809	112.841	1.38706
SAG-sg2-32	124.532	2458	1.8157	22.2518	8.56582	0.109477	8.66242	0.017668	1.29	0.148919		112.901	1.44374	105.487	8.6793	-58.8716	209.129	112.901	1.44374
SAG-sg2-93	1153.71	16836	2.04295	20.6468	1.31935	0.119289	1.95302	0.0178629	1.44	0.737319		114.135	1.62908	114.427	2.11347	120.507	31.074	114.135	1.62908
SAG-sg2-20	350.919	7534	2.00231	20.99	3.75903	0.117722	4.7722	0.0179212	2.94	0.616067		114.505	3.33671	113.004	5.10358	81.4925	89.2309	114.505	3.33671
SAG-sg2-53	701.534	11796	2.4272	20.3021	2.45275	0.122183	3.53815	0.0179907	2.55	0.720716		114.945	2.90512	117.049	3.9116	160.017	57.3721	114.945	2.90512
SAG-sg2-70	67.3704	1956	2.16086	20.842	22.0133	0.120779	22.3188	0.0182571	3.68	0.164884		116.631	4.25344	115.778	24.4262	98.2576	526.385	116.631	4.25344
SAG-sg2-36	981.001	116588	2.8258	20.2854	1.70613	0.124183	1.77788	0.0182702	0.5	0.281233		116.714	0.57832	118.857	1.99415	161.95	39.8862	116.714	0.57832
SAG-sg2-82	147.945	4606	2.73587	20.6361	6.76082	0.122356	7.27262	0.0183127	2.68	0.368505		116.983	3.10687	117.205	8.05051	121.744	159.433	116.983	3.10687
SAG-sg2-81	694.696	13398	2.72828	20.692	1.6061	0.122089	2.38268	0.0183222	1.76	0.738664		117.044	2.04138	116.964	2.63236	115.369	37.9087	117.044	2.04138
SAG-sg2-78	346.869	8498	2.4569	21.1302	5.42778	0.11976	5.60543	0.0183533	1.4	0.249758		117.24	1.62653	114.854	6.08738	65.6718	129.288	117.24	1.62653
SAG-sg2-28	371.943	11514	1.68741	20.8404	4.6248	0.12207	4.72542	0.0184507	0.97	0.205273		117.857	1.13283	116.947	5.21991	98.4918	109.477	117.857	1.13283
SAG-sg2-55	337.108	6418	2.71308	21.1683	3.71194	0.123641	3.88898	0.0189821	1.16	0.298279		121.22	1.39301	118.367	4.34511	61.379	88.4673	121.22	1.39301
SAG-sg2-89	321.467	5738	2.50975	20.5293	3.78136	0.129576	4.14592	0.0192929	1.7	0.410042		123.185	2.07427	123.716	4.82906	133.951	88.9134	123.185	2.07427
SAG-sg2-54	98.7551	2424	2.44878	23.7436	22.2912	0.113917	22.3852	0.0196171	2.05	0.0915783		125.235	2.54255	109.542	23.2489	-219.534	566.501	125.235	2.54255
SAG-sg2-94	89.3532	2120	3.24716	23.7993	15.2271	0.124328	15.2446	0.0214602	0.730002	0.047886		136.878	0.988675	118.988	17.1184	-225.435	385.262	136.878	0.988675
SAG-sg2-91	188.62	3986	1.47208	21.2212	6.34137	0.14477	6.42609	0.0222817	1.04	0.16184		142.06	1.46127	137.284	8.25178	55.4321	151.389	142.06	1.46127
SAG-sg2-33	62.5537	1698	1.39781	22.5825	11.5745	0.140329	11.644	0.0229837	1.27	0.109069		146.485	1.83939	133.337	14.5505	-94.9648	284.913	146.485	1.83939
SAG-sg2-51	671.659	16234	2.64937	19.9224	1.65775	0.159871	2.17629	0.0230999	1.41	0.647892		147.218	2.05225	150.59	3.04584	203.999	38.471	147.218	2.05225
SAG-sg2-29	202.135	4760	2.89024	21.0205	4.12011	0.152247	4.16074	0.0232109	0.58	0.139398		147.917	0.848149	143.894	5.58224	78.0455	97.873	147.917	0.848149
SAG-sg2-83	138.471	2710	0.785708	21.8021	7.31326	0.147944	7.42443	0.0233935	1.28	0.172404		149.067	1.88617	140.095	9.71589	-9.34189	176.771	149.067	1.88617
SAG-sg2-46	306.41	17400	2.76409	20.018	4.72464	0.162574	4.94804	0.0236032	1.47	0.297087		150.388	2.18511	152.954	7.02587	192.922	109.922	150.388	2.18511
SAG-sg2-64	113.892	1492	5.74446	20.2254	21.04	0.163693	21.0667	0.0240118	1.06	0.0503165		152.961	1.60231	153.931	30.0986	168.861	496.142	152.961	1.60231
SAG-sg2-100	340.638	11158	1.81947	20.8294	2.69326	0.161501	2.83965	0.0243978	0.9	0.31694		155.39	1.38179	152.016	4.00917	99.6987	63.7222	155.39	1.38179
SAG-sg2-79	234.614	5996	1.63828	21.0216	4.41868	0.162007	4.51549	0.0247001	0.930001	0.205958		157.292	1.44512	152.458	6.39241	77.9161	104.976	157.292	1.44512
SAG-sg2-40	1034.82	26922	0.914445	20.3884	1.96479	0.168628	3.16398	0.0249352	2.48	0.783822		158.771	3.88943	158.228	4.63576	150.118	46.0736	158.771	3.88943
SAG-sg2-18	519.473	13424	2.47	20.3988	3.36483	0.173538	3.76092	0.0256743	1.68	0.446699		163.418	2.71092	162.485	5.64711	148.923	78.8943	163.418	2.71092
SAG-sg2-39	436.709	31426	2.64995	20.2956	4.30878	0.177487	4.88422	0.0261258	2.3	0.470905		166.255	3.77498	165.896	7.47556	160.756	100.824	166.255	3.77498
SAG-sg2-98	391.665	6872	1.60938	18.7916	7.76395	0.195529	7.8839	0.0266486	1.37	0.173772		169.539	2.2924	181.336	13.0932	337.964	176.106	169.539	2.2924
SAG-sg2-90	516.15	17180	1.98146	20.4391	1.73887	0.179859	1.80933	0.026662	0.5	0.276345		169.623	0.837054	167.939	2.8006	144.259	40.7933	169.623	0.837054
SAG-sg2-48	139.302	5682	4.28821	21.8696	8.77525	0.169067	8.81729	0.0268162	0.860001	0.0975357		170.591	1.44784	158.609	12.9481	-16.8088	212.532	170.591	1.44784
SAG-sg2-38	354.402	10242	1.95252	20.0919	5.95889	0.187123	5.97983	0.0272676	0.500001	0.0836145		173.424	0.855563	174.171	9.57112	184.302	138.903	173.424	0.855563
SAG-sg2-26	126.905	12294	1.09138	14.0096	1.74591	1.1389	3.59274	0.11572	3.14	0.873984		705.884	20.9944	771.988	19.4269	968.313	35.6305	705.884	20.9944
SAG-sg2-92	58.2561	13054	2.76797	12.8246	1.80447	2.0276	2.39186	0.188593	1.57	0.656393		1113.75	16.0587	1124.81	16.2663	1146.25	35.8735	1146.25	35.8735
SAG-sg2-86	92.6682	27738	2.37748	11.0937	1.48009	2.88814	5.44502	0.232376	5.24	0.962347		1346.94	63.6959	1378.82	41.0906	1428.51	28.2569	1428.51	28.2569
SAG-sg2-24	185.105	47242	4.25012	9.46557	1.10047	4.485	1.62085	0.307899	1.19	0.734184		1730.36	18.0593	1728.2	13.4581	1725.57	20.2079	1725.57	20.2079
SAG-sg2-17	66.5636	266	3.55664	8.31053	13.6327	0.294683	13.9295	0.0177616	2.86001	0.205321		113.494	3.21752	262.238	32.2034	1961.1	244.467	1961.1	244.467
CRN-2 (SG-7)
SG-7-44	242.075	2072.7	1.78918	23.4845	22.3553	0.0423607	26.6621	0.00721512	14.5295	0.54495		46.3447	6.70951	42.1263	11.0024	-192.012	565.109	46.3447	6.70951
SG-7-56	575.852	6190.94	2.20699	26.2381	31.747	0.0393721	31.8767	0.00749238	2.87287	0.0901243		48.1189	1.37725	39.2108	12.2615	-477.367	859.025	48.1189	1.37725
SG-7-110	860.251	9992.44	3.36405	19.8028	6.50464	0.0888157	7.08442	0.012756	2.80688	0.396205		81.7107	2.27905	86.3995	5.86778	217.993	150.683	81.7107	2.27905
SG-7-60	504.376	20152.7	1.84001	21.4057	13.4475	0.0872401	13.8092	0.0135439	3.14015	0.227395		86.7238	2.70502	84.9292	11.2514	34.7362	323.229	86.7238	2.70502
SG-7-9	905.544	20771.2	2.48692	20.6697	7.39753	0.0914932	8.14505	0.0137159	3.40857	0.418484		87.8172	2.97302	88.8934	6.93263	117.868	174.602	87.8172	2.97302
SG-7-96	890.051	22202.1	1.77144	21.6309	5.14224	0.087494	5.42424	0.0137263	1.7262	0.318238		87.8834	1.50675	85.1663	4.43122	9.6551	123.785	87.8834	1.50675
SG-7-8	515.373	5967.72	1.90346	21.7398	18.3268	0.0876602	18.4182	0.0138216	1.8327	0.0995047		88.4894	1.61067	85.3214	15.0737	-2.43491	445.111	88.4894	1.61067
SG-7-85	469.743	8746.74	1.90666	20.1995	12.5865	0.0945396	12.9325	0.0138501	2.97159	0.229777		88.6707	2.61689	91.7234	11.3426	171.853	294.78	88.6707	2.61689
SG-7-24	857.053	16341.5	1.68527	20.8071	3.75928	0.0930589	4.67055	0.0140432	2.77162	0.593425		89.8987	2.47436	90.3488	4.03752	102.232	88.9279	89.8987	2.47436
SG-7-10	1010.99	23329.4	2.12702	21.8576	5.53601	0.0886883	5.6173	0.0140594	0.952153	0.169504		90.0017	0.850999	86.2807	4.64647	-15.4829	133.904	90.0017	0.850999
SG-7-43	1152.77	9429.46	0.975633	21.8789	3.78933	0.0892845	3.97189	0.0141678	1.1903	0.299683		90.6904	1.07193	86.8367	3.3057	-17.8416	91.6758	90.6904	1.07193
SG-7-104	614.486	11089.9	2.37058	23.0633	8.80045	0.0847489	8.87873	0.014176	1.17644	0.132501		90.7429	1.06006	82.6	7.04357	-146.937	218.545	90.7429	1.06006
SG-7-2	681.59	10175.5	1.87242	21.5826	7.82509	0.0905746	8.11521	0.0141778	2.1505	0.264996		90.7541	1.93799	88.0385	6.84365	15.0189	188.309	90.7541	1.93799
SG-7-38	806.959	27956	2.05235	20.9419	6.21952	0.0936033	6.47721	0.0142169	1.80882	0.279259		91.003	1.63452	90.8545	5.62929	86.9776	147.591	91.003	1.63452
SG-7-33	762.064	36387.2	1.54467	20.477	7.22604	0.0961322	7.54726	0.0142769	2.17842	0.288637		91.3841	1.97668	93.1997	6.72096	139.937	169.836	91.3841	1.97668
SG-7-41	219.734	6199.98	2.11547	26.4811	32.5348	0.0746133	32.9422	0.0143302	5.16442	0.156772		91.7225	4.70339	73.0679	23.2286	-501.856	885.745	91.7225	4.70339
SG-7-95	495.065	4864.4	2.54305	21.6631	12.6256	0.0917967	12.9435	0.0144227	2.85111	0.220273		92.3107	2.61312	89.1757	11.0506	6.08078	305.004	92.3107	2.61312
SG-7-83	442.543	6865.09	2.07041	21.8329	15.3298	0.0913021	15.8916	0.0144574	4.18799	0.263535		92.5314	3.84752	88.7157	13.5008	-12.7515	372.233	92.5314	3.84752
SG-7-81	612.923	10398.9	2.75734	21.7609	5.74404	0.0917106	6.27445	0.0144742	2.52483	0.402398		92.6378	2.32222	89.0957	5.35207	-4.76961	138.678	92.6378	2.32222
SG-7-3	1443.25	3635.54	2.13978	20.3614	4.6391	0.0981006	5.59435	0.014487	3.12657	0.55888		92.7192	2.87818	95.0215	5.07472	153.202	108.713	92.7192	2.87818
SG-7-101	495.329	13913.7	1.88026	21.1321	7.87952	0.0949544	8.42008	0.0145531	2.96832	0.352529		93.1395	2.7448	92.1082	7.41434	65.471	187.843	93.1395	2.7448
SG-7-28	426.51	12758.3	2.97573	21.6358	11.1622	0.0929102	11.3408	0.0145793	2.0049	0.176786		93.3056	1.85721	90.2108	9.78964	9.11288	269.288	93.3056	1.85721
SG-7-59	209.748	3184.97	1.43532	27.3606	16.6363	0.0736765	17.0521	0.0146202	3.7426	0.219481		93.5657	3.4765	72.1823	11.8818	-589.677	453.761	93.5657	3.4765
SG-7-63	129.217	2463.18	1.26143	38.2441	84.1608	0.0527105	84.4426	0.0146205	6.89302	0.0816297		93.5672	6.40303	52.1585	42.9575	-1603.09	1254.19	93.5672	6.40303
SG-7-66	427.645	5966.76	2.33484	22.9194	11.1387	0.0881191	11.9102	0.0146478	4.21683	0.354053		93.7409	3.92429	85.7497	9.79387	-131.441	276.053	93.7409	3.92429
SG-7-13	624.674	14181.3	3.09266	21.4008	9.40045	0.0944651	9.49833	0.0146622	1.36013	0.143197		93.8326	1.26701	91.6544	8.32447	35.2848	225.5	93.8326	1.26701
SG-7-64	494.733	14536.6	2.40519	21.5628	12.1548	0.0940811	12.3946	0.0147132	2.42605	0.195735		94.1563	2.26768	91.298	10.8226	17.1957	292.939	94.1563	2.26768
SG-7-7	884.552	29595.2	2.02551	21.7092	4.91356	0.093957	5.13632	0.0147935	1.49622	0.291303		94.6666	1.40607	91.1828	4.47933	0.917566	118.476	94.6666	1.40607
SG-7-29	343.663	5617.02	1.45812	23.3266	14.8944	0.0879651	15.0401	0.014882	2.08813	0.138838		95.2287	1.97389	85.606	12.348	-175.167	373.06	95.2287	1.97389
SG-7-17	489.253	8999.02	2.04726	22.1271	10.1674	0.0933774	10.5332	0.0149853	2.75169	0.26124		95.8849	2.61893	90.6447	9.13424	-45.1976	247.731	95.8849	2.61893
SG-7-106	583.009	12846.1	2.59998	19.5589	7.80142	0.105752	8.46051	0.0150015	3.27385	0.386957		95.9875	3.11921	102.072	8.21614	246.561	179.875	95.9875	3.11921
SG-7-105	607.82	12141.1	3.02114	20.0234	4.58563	0.10332	4.94911	0.0150045	1.86163	0.376154		96.0064	1.77404	99.8362	4.7059	192.298	106.688	96.0064	1.77404
SG-7-12	338.045	5982.23	2.30471	21.2925	12.5514	0.0975364	13.4033	0.0150623	4.70222	0.350825		96.3739	4.49801	94.4997	12.0951	47.4291	300.821	96.3739	4.49801
SG-7-57	473.752	13018	2.24274	22.3835	12.7291	0.0934216	12.9382	0.0151661	2.31616	0.179018		97.0331	2.23061	90.6857	11.2248	-73.2828	312.215	97.0331	2.23061
SG-7-5	823.123	17701.9	1.53366	20.4169	4.52893	0.102522	5.79285	0.0151812	3.61191	0.623512		97.1287	3.48191	99.1015	5.4696	146.849	106.24	97.1287	3.48191
SG-7-18	293.475	5597.46	2.4388	21.5662	18.8952	0.0972883	19.219	0.0152171	3.51278	0.182777		97.357	3.39424	94.2702	17.3038	16.8209	457.45	97.357	3.39424
SG-7-35	351.327	5717.7	2.18029	21.8505	21.0226	0.0963724	21.2989	0.0152726	3.41942	0.160545		97.7091	3.31589	93.4223	19.0122	-14.6945	512.966	97.7091	3.31589
SG-7-88	424.632	10280.8	2.368	19.6477	11.1317	0.107191	12.0472	0.0152745	4.60659	0.382379		97.7215	4.46767	103.392	11.8432	236.124	257.487	97.7215	4.46767
SG-7-86	683.805	9305.2	2.44413	21.9988	6.96519	0.0957776	7.08503	0.0152813	1.29761	0.183149		97.7647	1.25904	92.8712	6.28809	-31.0686	169.047	97.7647	1.25904
SG-7-25	200.488	2383.05	1.93927	24.6118	24.3079	0.085649	24.8803	0.0152885	5.30616	0.213267		97.8103	5.15079	83.4421	19.9331	-310.69	630.272	97.8103	5.15079
SG-7-48	200.257	4638.73	1.0619	19.9016	20.3375	0.106027	21.6162	0.0153039	7.32437	0.338837		97.9083	7.11698	102.325	21.0437	206.425	476	97.9083	7.11698
SG-7-78	300.949	8843.48	2.58874	22.0401	12.5878	0.0963742	15.5739	0.0154054	9.17028	0.588824		98.5524	8.9688	93.4239	13.9013	-35.6218	306.506	98.5524	8.9688
SG-7-32	548.96	16134.7	1.984	21.7378	9.55156	0.0979571	9.86183	0.0154436	2.45429	0.248867		98.7952	2.40623	94.8888	8.93407	-2.20919	230.772	98.7952	2.40623
SG-7-26	533.549	17270.9	2.40118	22.1565	9.53913	0.0961539	10.343	0.0154513	3.99792	0.386532		98.844	3.92156	93.2199	9.21267	-48.4157	232.511	98.844	3.92156
SG-7-51	844.925	41976.9	2.36334	20.237	6.42403	0.105402	6.75315	0.0154701	2.08252	0.308377		98.9633	2.04519	101.75	6.53838	167.513	150.228	98.9633	2.04519
SG-7-92	255.807	6444.76	2.93088	19.6432	21.5386	0.108879	22.0276	0.0155115	4.61581	0.209546		99.2259	4.54501	104.939	21.9646	236.677	501.932	99.2259	4.54501
SG-7-53	1142.77	26917.2	2.12283	20.998	3.98915	0.102312	4.23896	0.0155813	1.43369	0.338216		99.6689	1.41795	98.908	3.99496	80.5846	94.7148	99.6689	1.41795
SG-7-76	127.156	3065.11	1.59667	19.2886	48.311	0.111385	51.327	0.0155822	17.335	0.337737		99.6745	17.1458	107.232	52.2785	278.56	1170.87	99.6745	17.1458
SG-7-58	256.216	8291.33	0.922825	21.7677	13.4831	0.0991166	13.7414	0.0156479	2.65155	0.192961		100.092	2.63349	95.9606	12.583	-5.52198	326.584	100.092	2.63349
SG-7-54	134.888	4406.56	2.14204	22.0236	35.9333	0.0983974	37.1341	0.015717	9.36683	0.252244		100.531	9.3435	95.2959	33.7899	-33.8064	897.061	100.531	9.3435
SG-7-97	349.471	2677.2	1.94095	18.5473	21.5	0.11692	26.9392	0.0157278	16.2318	0.602533		100.599	16.2023	112.276	28.6415	367.524	489.515	100.599	16.2023
SG-7-14	365.959	1331.91	1.78568	20.8482	15.2078	0.104078	15.5982	0.0157372	3.46777	0.222319		100.658	3.46349	100.534	14.9312	97.5588	361.667	100.658	3.46349
SG-7-50	1053.28	25155.3	2.4145	22.1846	4.56105	0.09829	5.07445	0.0158147	2.22415	0.438304		101.15	2.23218	95.1967	4.6112	-51.5101	111.054	101.15	2.23218
SG-7-39	283.299	8171.06	4.18419	24.2773	18.8857	0.0909164	19.1306	0.0160081	3.05144	0.159505		102.378	3.09932	88.3567	16.19	-275.753	483.881	102.378	3.09932
SG-7-90	838.939	16928.6	3.95393	20.2321	5.53841	0.110201	5.93572	0.0161705	2.13512	0.359707		103.408	2.19027	106.149	5.98261	168.087	129.432	103.408	2.19027
SG-7-21	1261.93	32918.3	2.41981	20.7368	2.69414	0.107554	3.54996	0.016176	2.31168	0.651184		103.443	2.37218	103.726	3.50041	110.224	63.5948	103.443	2.37218
SG-7-61	147.16	2440.96	3.96289	23.9553	29.035	0.0931511	29.4318	0.0161841	4.81638	0.163645		103.494	4.94488	90.4345	25.471	-241.915	746.752	103.494	4.94488
SG-7-37	196.564	5460.24	3.03617	22.2514	26.9429	0.100577	27.9764	0.0162313	7.53384	0.269293		103.794	7.75704	97.3084	25.9653	-58.8341	667.093	103.794	7.75704
SG-7-23	1172.97	28792.5	1.8826	20.8698	3.7668	0.107269	6.23208	0.0162365	4.96488	0.796665		103.826	5.11357	103.464	6.13042	95.1486	89.1966	103.826	5.11357
SG-7-98	155.405	2610.21	1.9569	18.6875	27.8262	0.121032	28.4306	0.016404	5.8309	0.205093		104.889	6.06651	116.007	31.1771	350.56	640.067	104.889	6.06651
SG-7-79	519.006	14087.2	2.32549	20.107	12.3206	0.113062	12.4284	0.0164878	1.63302	0.131395		105.421	1.70755	108.763	12.8193	182.549	287.948	105.421	1.70755
SG-7-82A	668.514	16209.9	2.03098	21.6658	6.78757	0.105069	7.06654	0.01651	1.96592	0.278201		105.561	2.05835	101.445	6.82225	5.74491	163.566	105.561	2.05835
SG-7-27	720.466	20804	2.96405	21.0402	5.65932	0.108857	5.82627	0.0166114	1.38474	0.237673		106.204	1.45861	104.92	5.80773	75.8208	134.545	106.204	1.45861
SG-7-6	996.798	6120.74	2.26826	19.4143	4.77982	0.12025	5.88555	0.0169318	3.4341	0.58348		108.236	3.68589	115.298	6.41493	263.659	109.763	108.236	3.68589
SG-7-82	655.945	18538.6	2.8134	22.0349	5.02447	0.105985	5.59577	0.0169376	2.4632	0.440189		108.272	2.6447	102.286	5.44487	-35.0497	121.988	108.272	2.6447
SG-7-52	186.556	9478.25	1.89011	20.5969	15.3016	0.11552	16.9116	0.0172568	7.20155	0.425835		110.295	7.87542	111.003	17.7844	126.224	361.995	110.295	7.87542
SG-7-102	452.288	15854.7	7.7956	19.3732	7.96418	0.123883	9.19275	0.0174066	4.59112	0.499428		111.244	5.06354	118.586	10.2892	268.485	182.894	111.244	5.06354
SG-7-19	229.148	7171.44	5.81539	22.3088	15.4349	0.107777	15.9776	0.0174381	4.12881	0.258413		111.444	4.56177	103.929	15.7851	-65.1077	378.59	111.444	4.56177
SG-7-103	119.448	4071.04	2.80369	34.2539	31.9996	0.0705143	32.5912	0.0175181	6.18163	0.189671		111.951	6.86065	69.1874	21.8013	-1243.38	1022.56	111.951	6.86065
SG-7-94	351.05	10282.8	2.47472	21.3849	11.2974	0.116897	12.4426	0.0181305	5.21426	0.419064		115.83	5.98574	112.255	13.2239	37.0667	271.118	115.83	5.98574
SG-7-4	208.07	9536.93	1.52998	24.1447	23.2358	0.104523	24.852	0.0183035	8.81571	0.354729		116.925	10.2149	100.943	23.8841	-261.85	596.006	116.925	10.2149
SG-7-67	102.042	2531.39	2.46663	22.1305	27.3076	0.114431	28.5892	0.0183669	8.46384	0.29605		117.326	9.84051	110.011	29.816	-45.568	674.72	117.326	9.84051
SG-7-89	205.748	4762.44	5.90082	27.1339	29.2239	0.0941179	29.516	0.0185218	4.14187	0.140326		118.307	4.85544	91.3322	25.7863	-567.159	802.862	118.307	4.85544
SG-7-100	1082.28	42393.9	2.38372	20.8693	2.1966	0.123706	2.52239	0.018724	1.23992	0.491566		119.586	1.46911	118.426	2.81956	95.1774	52.0215	119.586	1.46911
SG-7-22	153.928	3754.27	2.63	22.1141	18.6242	0.11816	20.5299	0.0189512	8.6379	0.420748		121.024	10.3565	113.402	22.0318	-43.7674	456.001	121.024	10.3565
SG-7-84	61.3366	3124.57	1.27405	13.884	37.3724	0.189128	38.2308	0.0190445	8.05563	0.210711		121.614	9.70496	175.885	61.8168	986.679	787.849	121.614	9.70496
SG-7-107	141.489	4284.24	2.12026	18.8586	26.6141	0.142329	27.165	0.0194671	5.44293	0.200366		124.287	6.70007	135.117	34.3802	329.902	613.441	124.287	6.70007
SG-7-69	127.55	2547.79	2.99203	22.8413	23.3438	0.117984	23.7924	0.0195453	4.59842	0.193272		124.782	5.6828	113.243	25.5004	-123.007	582.81	124.782	5.6828
SG-7-108	198.42	5666.9	2.16464	21.622	16.387	0.126933	16.6743	0.0199053	3.08151	0.184806		127.058	3.87696	121.338	19.0723	10.6523	396.432	127.058	3.87696
SG-7-75	52.9684	1475.35	4.30206	21.4692	38.5202	0.131248	39.7921	0.0204366	9.98007	0.250805		130.415	12.8847	125.219	46.9106	27.6827	955.105	130.415	12.8847
SG-7-74	109.201	2851.94	3.17027	32.1492	34.7961	0.0924804	35.5133	0.0215634	7.10089	0.19995		137.529	9.66238	89.8114	30.5343	-1049.12	1068.41	137.529	9.66238
SG-7-91	68.8606	2911.89	5.64271	20.9369	51.7989	0.147651	52.7313	0.0224205	9.87276	0.187228		142.936	13.9564	139.835	68.9909	87.548	1310.93	142.936	13.9564
SG-7-72	261.588	9097.29	1.83001	22.0287	11.6366	0.14183	11.8568	0.0226599	2.27451	0.191831		144.444	3.24887	134.673	14.9554	-34.3671	283.133	144.444	3.24887
SG-7-55	64.7729	2157.43	1.76152	22.2123	29.7134	0.141285	31.2189	0.0227609	9.57762	0.306789		145.081	13.7401	134.188	39.2614	-54.5403	737.685	145.081	13.7401
SG-7-1	181.495	10177.6	3.22824	22.3541	21.0496	0.142724	21.1018	0.0231395	1.48206	0.070234		147.467	2.16074	135.467	26.7673	-70.0705	519.061	147.467	2.16074
SG-7-70	169.392	6748.29	1.49024	21.9348	14.3203	0.14611	14.8505	0.0232441	3.93263	0.264815		148.126	5.75885	138.471	19.2254	-24.0181	348.243	148.126	5.75885
SG-7-34	153.58	3716.96	2.52098	19.9204	11.5065	0.162656	12.046	0.0234999	3.56438	0.295898		149.737	5.2757	153.025	17.1132	204.232	267.745	149.737	5.2757
SG-7-15	763.205	11386.5	0.87798	20.2923	3.61591	0.162768	4.20489	0.0239552	2.14622	0.51041		152.605	3.23676	153.123	5.97676	161.146	84.5955	152.605	3.23676
SG-7-30	857.549	31217.9	3.59746	20.3267	3.17526	0.171058	3.65707	0.025218	1.81437	0.496125		160.55	2.87698	160.337	5.42417	157.198	74.3355	160.55	2.87698
SG-7-65	437.463	13637.6	1.71081	20.3799	7.84556	0.181078	8.61913	0.0267649	3.56882	0.414059		170.269	5.99706	168.988	13.4186	151.078	184.078	170.269	5.99706
SG-7-49	433.775	18477.2	2.1964	20.9753	5.56697	0.176532	6.33963	0.0268553	3.0331	0.478435		170.836	5.11358	165.072	9.65885	83.1542	132.178	170.836	5.11358
SG-7-11	518.929	90062.9	5.30366	16.8894	1.03681	0.746601	1.84862	0.0914537	1.53049	0.827913		564.129	8.26696	566.25	8.02381	574.78	22.5312	564.129	8.26696
SG-7-68	269.179	114423	1.99289	10.5534	0.590162	3.26901	1.29096	0.250211	1.14816	0.889389		1439.56	14.8131	1473.71	10.0379	1523.22	11.1228	1523.22	11.1228
SG-7-31	150.402	61721.2	2.63501	9.20244	0.75464	4.70391	1.30874	0.313951	1.06926	0.817015		1760.12	16.4696	1767.94	10.9594	1777.17	13.7678	1777.17	13.7678
SG-7-46	194.241	117666	3.36853	9.19644	0.609328	4.70776	1.09304	0.314002	0.907441	0.830202		1760.37	13.9789	1768.62	9.1543	1778.36	11.1146	1778.36	11.1146
SG-7-93	201.146	134261	3.30195	9.08547	0.617145	4.70231	1.71905	0.309854	1.60445	0.933336		1739.99	24.467	1767.65	14.3949	1800.48	11.2284	1800.48	11.2284
SG-7-40	136.175	8158.37	1.0539	9.07309	1.52855	4.90667	2.12792	0.322879	1.4804	0.695704		1803.78	23.2927	1803.4	17.9504	1802.96	27.7999	1802.96	27.7999
SG-7-45	63.1263	35299.1	1.16608	5.46634	0.905642	13.0603	1.71251	0.517784	1.45345	0.848723		2689.77	31.9639	2684.02	16.1532	2679.67	14.9806	2679.67	14.9806
WGY-1 (CR15)
CR15-110	401.853	3276.58	3.01585	22.3941	5.23555	0.0859001	5.5496	0.0139577	1.8404	0.331628		89.3551	1.63315	83.677	4.45757	NA	NA	89.3551	1.63315
CR15-104	1302.07	10486.4	1.95004	20.2151	1.06922	0.0956104	2.25885	0.0140239	1.98977	0.880877		89.7757	1.77395	92.7163	2.00155	170.051	24.9901	89.7757	1.77395
CR15-38	699.164	35142.5	3.54094	20.6906	1.19955	0.094331	2.09912	0.0141617	1.72262	0.820636		90.6518	1.55065	91.5299	1.83728	115.531	28.2891	90.6518	1.55065
CR15-107	291.704	4316.96	2.70025	22.6024	4.24009	0.0868358	4.63446	0.014241	1.8708	0.40367		91.1561	1.69334	84.5515	3.75981	NA	NA	91.1561	1.69334
CR15-109	68.1033	19125.5	1.39247	21.2077	3.02963	0.0926099	4.28061	0.0142508	3.02407	0.706457		91.218	2.73907	89.9317	3.68409	56.9454	72.2587	91.218	2.73907
CR15-18	310.043	1745.2	1.80326	25.04	1.46125	0.078807	2.61575	0.0143182	2.16953	0.829413		91.6463	1.97423	77.0227	1.9402	NA	NA	91.6463	1.97423
CR15-64	1627.64	7215.13	1.4877	18.2422	3.31773	0.108263	3.95165	0.0143299	2.14667	0.543235		91.7208	1.95501	104.375	3.91964	404.786	74.2897	91.7208	1.95501
CR15-80	1076.75	31722.3	19.8042	21.1053	0.830548	0.0937198	1.9301	0.0143519	1.74226	0.90268		91.8607	1.58911	90.9626	1.67933	68.492	19.7862	91.8607	1.58911
CR15-45	799.415	7822.59	2.07127	19.4697	2.04064	0.102069	3.01589	0.0144191	2.22067	0.736324		92.2879	2.03481	98.6841	2.83615	257.109	46.9032	92.2879	2.03481
CR15-90	424.904	5243.8	2.34517	22.0351	1.7018	0.0901866	3.07451	0.0144193	2.56056	0.832836		92.2893	2.34629	87.6772	2.58255	NA	NA	92.2893	2.34629
CR15-13	753.953	6636.83	1.35984	22.0529	1.22092	0.0909115	1.88332	0.014547	1.43396	0.7614		93.1004	1.32543	88.3522	1.59362	NA	NA	93.1004	1.32543
CR15-6	169.412	3145.76	1.73746	22.5217	3.94907	0.0891004	4.46496	0.0145603	2.08344	0.466621		93.1847	1.92749	86.665	3.70904	NA	NA	93.1847	1.92749
CR15-32	110.522	1184.92	2.43997	27.5046	6.23335	0.0734801	6.59666	0.0146643	2.15901	0.327288		93.8459	2.01146	71.9965	4.58493	NA	NA	93.8459	2.01146
CR15-75	495.684	5947.39	2.36262	21.9208	1.3726	0.0926886	2.91854	0.0147425	2.57562	0.882505		94.3422	2.41221	90.0048	2.51377	NA	NA	94.3422	2.41221
CR15-68	267.756	4994.67	1.26238	22.1266	3.50952	0.0927067	4.36595	0.0148838	2.59706	0.594845		95.2402	2.45527	90.0217	3.76113	NA	NA	95.2402	2.45527
CR15-22	243.234	27512.3	1.6854	21.131	1.50146	0.097347	2.43381	0.0149256	1.91547	0.787027		95.5055	1.8159	94.3245	2.19228	65.5955	35.7421	95.5055	1.8159
CR15-89	2851.12	37083.7	3.59771	20.8282	0.983745	0.098798	2.25211	0.014931	2.0259	0.899554		95.5397	1.92126	95.6662	2.05613	99.8695	23.2715	95.5397	1.92126
CR15-85	465.501	15609.4	2.04838	21.255	1.15177	0.0968675	2.88619	0.0149392	2.64641	0.916923		95.5918	2.51109	93.8807	2.58809	51.6791	27.4755	95.5918	2.51109
CR15-94	541.973	21194	1.81165	20.7858	1.52597	0.0991355	2.22737	0.0149515	1.62252	0.728448		95.6701	1.54081	95.9781	2.03986	104.664	36.0728	95.6701	1.54081
CR15-7	526.31	4438.82	2.45989	22.263	1.09926	0.0926202	2.05323	0.0149615	1.73418	0.844611		95.734	1.64793	89.9413	1.76728	NA	NA	95.734	1.64793
CR15-20	330.322	6494.79	3.1138	22.0917	1.41375	0.0944018	2.75028	0.015132	2.3591	0.857767		96.8165	2.26693	91.5956	2.40886	NA	NA	96.8165	2.26693
CR15-3	260.15	1000.5	1.52019	30.3094	1.47386	0.0692036	2.25607	0.0152193	1.7081	0.757113		97.3705	1.65069	67.9434	1.48269	NA	NA	97.3705	1.65069
CR15-103	370.387	22031.7	2.7619	20.88	1.3097	0.100459	3.0504	0.0152196	2.75493	0.903136		97.3729	2.6624	97.1995	2.82749	93.9631	31.0171	97.3729	2.6624
CR15-53	618.425	13643.6	2.99137	20.2319	1.18887	0.103802	2.01715	0.0152382	1.62956	0.807852		97.4907	1.57671	100.28	1.92612	168.105	27.7849	97.4907	1.57671
CR15-10	231.89	8010.81	3.16051	21.9036	2.08117	0.0961626	2.68497	0.015283	1.69641	0.631816		97.7753	1.64615	93.228	2.39167	NA	NA	97.7753	1.64615
CR15-48	120.664	1173.72	3.02647	28.5456	7.12763	0.0743372	7.56766	0.0153969	2.54291	0.336024		98.4985	2.48569	72.8069	5.31693	NA	NA	98.4985	2.48569
CR15-59	256.594	2909.51	1.31454	23.3661	6.08012	0.0913819	6.53235	0.0154929	2.38824	0.365602		99.108	2.34884	88.7899	5.55376	NA	NA	99.108	2.34884
CR15-88	419.195	3340.7	1.62085	23.2136	1.49899	0.0920226	2.17085	0.0154997	1.57023	0.723325		99.1513	1.54499	89.3858	1.85747	NA	NA	99.1513	1.54499
CR15-12	251.272	2881.53	2.19161	23.9044	1.65208	0.0900334	2.25554	0.015616	1.53561	0.680816		99.889	1.52208	87.5345	1.89167	NA	NA	99.889	1.52208
CR15-63	256.502	1606.5	1.61623	24.7361	1.60189	0.087051	2.72132	0.015624	2.1999	0.808393		99.9402	2.18163	84.7525	2.21276	NA	NA	99.9402	2.18163
CR15-72	498.443	31362.9	2.51651	21.1479	1.30608	0.101922	2.52423	0.0156396	2.16007	0.855734		100.039	2.14423	98.5492	2.3707	63.6693	31.1021	100.039	2.14423
CR15-33	337.975	5679.24	2.67772	22.4349	1.63738	0.0966387	2.6091	0.0157313	2.03135	0.778563		100.621	2.02809	93.6689	2.33458	NA	NA	100.621	2.02809
CR15-58	105.066	18084.8	1.98225	22.0304	2.48025	0.0984438	3.47254	0.0157362	2.43041	0.699893		100.652	2.42725	95.3389	3.16001	NA	NA	100.652	2.42725
CR15-52	73.3635	1694.48	2.93475	25.2832	2.63466	0.085784	3.83992	0.0157371	2.79348	0.727485		100.658	2.79003	83.5683	3.08046	NA	NA	100.658	2.79003
CR15-96	277.107	2853.89	3.24563	23.3167	3.75932	0.093055	4.09357	0.0157433	1.62013	0.395774		100.697	1.61875	90.3452	3.5386	NA	NA	100.697	1.61875
CR15-47	144.533	7674.4	2.00881	21.4849	1.65627	0.10218	2.49529	0.015929	1.86634	0.747947		101.876	1.8864	98.787	2.34891	25.8892	39.7159	101.876	1.8864
CR15-26	302.365	6393.06	1.76504	21.6479	1.51045	0.101627	2.4684	0.0159629	1.95232	0.790924		102.09	1.97743	98.2766	2.31217	7.73433	36.3476	102.09	1.97743
CR15-17	205.251	1428.51	3.34246	26.0847	5.93925	0.0848968	6.22457	0.0160681	1.86295	0.29929		102.758	1.89916	82.7384	4.94591	NA	NA	102.758	1.89916
CR15-77	305.384	48750.9	4.38182	20.6169	1.84298	0.107691	2.73692	0.0161098	2.0234	0.739298		103.023	2.068	103.851	2.7018	123.893	43.4055	103.023	2.068
CR15-54	539.132	210962	3.75167	20.8479	1.45538	0.106536	3.4	0.0161156	3.07277	0.903754		103.06	3.1416	102.792	3.32386	97.5947	34.4531	103.06	3.1416
CR15-5	141.368	1457.16	2.11472	24.9685	13.0469	0.0892926	13.1737	0.0161769	1.82378	0.138441		103.449	1.87162	86.8442	10.9654	NA	NA	103.449	1.87162
CR15-106	113.471	2526.95	2.64267	23.3391	2.86157	0.0956121	3.7144	0.0161914	2.36816	0.637562		103.54	2.43242	92.7179	3.29137	NA	NA	103.54	2.43242
CR15-60	158.458	1365.82	2.62549	25.7829	12.821	0.0868626	13.0095	0.01625	2.2065	0.169607		103.912	2.27444	84.5765	10.5576	NA	NA	103.912	2.27444
CR15-62	520.063	16751.3	2.79101	21.1684	1.18916	0.10632	2.05188	0.0163301	1.67216	0.814938		104.421	1.73201	102.593	2.00224	61.3695	28.3454	104.421	1.73201
CR15-86	605.975	33051.6	1.86133	20.7284	1.25406	0.108933	2.85026	0.0163837	2.55956	0.898007		104.76	2.65973	104.989	2.84296	111.184	29.6265	104.76	2.65973
CR15-27	124.513	1430.6	4.91573	25.1005	13.2593	0.0900365	13.4142	0.0163979	2.03279	0.151541		104.85	2.11415	87.5374	11.2509	NA	NA	104.85	2.11415
CR15-66	97.9943	888.064	3.03252	31.9164	5.30783	0.0708708	5.74351	0.0164123	2.19427	0.382043		104.941	2.28406	69.5254	3.85957	NA	NA	104.941	2.28406
CR15-23	73.5607	1527.85	2.59674	25.9348	4.85793	0.0875022	5.52431	0.0164661	2.63031	0.476133		105.283	2.74676	85.1738	4.51336	NA	NA	105.283	2.74676
CR15-24	104.655	75030	1.86732	20.7773	1.93771	0.109258	2.78962	0.0164714	2.00681	0.719383		105.316	2.09633	105.287	2.78996	105.619	45.804	105.316	2.09633
CR15-81	121.444	9915.67	3.40659	21.1852	1.81922	0.107333	3.06607	0.0164988	2.46804	0.804952		105.49	2.58236	103.523	3.01765	59.5221	43.3681	105.49	2.58236
CR15-76	161.175	1169.23	4.9493	29.1495	2.12687	0.078177	2.90228	0.0165348	1.97476	0.680416		105.718	2.07066	76.4296	2.13678	NA	NA	105.718	2.07066
CR15-34	99.267	2153.7	1.49817	23.2908	6.7072	0.0979591	7.02562	0.0165545	2.09111	0.297641		105.844	2.19523	94.8907	6.36471	NA	NA	105.844	2.19523
CR15-4	197.038	2583.16	2.1573	23.8112	7.09171	0.0958427	7.34976	0.0165588	1.93048	0.262659		105.871	2.02712	92.9315	6.5271	NA	NA	105.871	2.02712
CR15-74	388.839	4813.55	1.59723	21.7281	2.25284	0.105106	3.22195	0.0165706	2.3034	0.714909		105.946	2.42041	101.479	3.11153	NA	NA	105.946	2.42041
CR15-71	98.5945	14438.9	4.20393	20.9343	2.13344	0.10933	3.00914	0.0166069	2.12211	0.705221		106.176	2.23471	105.353	3.0113	87.8374	50.5989	106.176	2.23471
CR15-42	118.599	13826.2	2.93206	21.3158	2.35175	0.10762	3.4239	0.0166449	2.48844	0.726786		106.417	2.62638	103.786	3.37795	44.8065	56.1924	106.417	2.62638
CR15-84	134.781	2840	2.60592	24.0938	2.66125	0.0952261	3.39825	0.0166475	2.11326	0.621867		106.433	2.23074	92.36	3.00012	NA	NA	106.433	2.23074
CR15-25	847.885	15310.7	2.15394	21.2968	1.12051	0.108199	2.33929	0.0167196	2.05347	0.877817		106.89	2.17685	104.317	2.3191	46.9654	26.7666	106.89	2.17685
CR15-73	135.529	565.173	1.72731	50.5361	2.43116	0.0456368	3.13977	0.0167342	1.98686	0.632806		106.983	2.10807	45.3126	1.39143	NA	NA	106.983	2.10807
CR15-87	93.0649	1104.41	2.52483	27.586	4.07454	0.0838406	5.10569	0.0167815	3.07671	0.602605		107.283	3.27347	81.7494	4.01029	NA	NA	107.283	3.27347
CR15-108	157.601	37274.1	2.75503	20.2592	1.97708	0.114279	2.63396	0.0167987	1.74038	0.660747		107.392	1.85355	109.872	2.74292	164.962	46.2348	107.392	1.85355
CR15-70	199.229	1912.66	1.39104	24.5447	1.54803	0.0944497	3.04261	0.0168208	2.61937	0.860895		107.532	2.79329	91.6401	2.66614	NA	NA	107.532	2.79329
CR15-65	76.1464	1564.97	2.24274	26.5288	4.18842	0.0874241	4.72271	0.0168282	2.18201	0.462025		107.579	2.3279	85.101	3.85528	NA	NA	107.579	2.3279
CR15-91	582.334	51437.3	3.00045	20.4648	1.05375	0.113476	2.33156	0.01685	2.07984	0.892042		107.717	2.22173	109.14	2.41268	141.335	24.7342	107.717	2.22173
CR15-55	159.07	1607.06	1.90063	25.4353	3.59481	0.0915002	4.03561	0.0168867	1.83397	0.454447		107.95	1.96329	88.8999	3.43509	NA	NA	107.95	1.96329
CR15-69	341.389	15795.1	2.16535	20.2902	1.16719	0.114784	2.02658	0.0168988	1.65671	0.817492		108.027	1.77478	110.332	2.11878	161.425	27.2909	108.027	1.77478
CR15-30	145.621	1930.86	3.60235	23.7913	5.60633	0.0979254	5.88767	0.0169045	1.79825	0.305426		108.063	1.92704	94.8595	5.33212	NA	NA	108.063	1.92704
CR15-43	229.669	9169.46	3.99442	20.889	1.84731	0.111587	2.6914	0.016913	1.95731	0.727247		108.116	2.09853	107.417	2.74335	92.9636	43.781	108.116	2.09853
CR15-28	104.227	7946.93	3.89078	21.3332	2.18602	0.109444	2.98649	0.0169409	2.03481	0.681338		108.293	2.18516	105.457	2.99143	42.8789	52.2576	108.293	2.18516
CR15-9	119.353	764.218	3.67756	35.3141	22.8596	0.0664711	23.0624	0.0170321	3.05138	0.13231		108.872	3.2942	65.3451	14.5964	NA	NA	108.872	3.2942
CR15-98	596.586	33527.6	1.62445	20.6304	1.19201	0.114149	2.15523	0.0170871	1.79559	0.83313		109.22	1.94462	109.754	2.24209	122.384	28.063	109.22	1.94462
CR15-93	354.429	18938.2	1.89721	20.6045	1.2125	0.115219	2.21865	0.0172255	1.85802	0.837456		110.097	2.02826	110.728	2.32746	125.316	28.5549	110.097	2.02826
CR15-36	236.275	2994.94	2.91535	22.9874	5.09075	0.103479	5.32176	0.0172595	1.55092	0.291431		110.313	1.69631	99.9827	5.0673	NA	NA	110.313	1.69631
CR15-37	518.289	52731.4	3.99255	20.7556	1.15875	0.115895	2.1292	0.0174537	1.78628	0.838943		111.543	1.97533	111.344	2.24537	108.098	27.3881	111.543	1.97533
CR15-8	120.097	613.869	2.34692	45.1458	5.72363	0.0537696	6.14056	0.0176134	2.22409	0.362196		112.555	2.48159	53.1795	3.18149	NA	NA	112.555	2.48159
CR15-92	128.582	7169.5	2.12971	21.4662	1.97499	0.113585	3.01443	0.0176915	2.27732	0.755473		113.05	2.55207	109.24	3.12202	27.9973	47.3352	113.05	2.55207
CR15-29	100.644	34174.8	2.13236	19.7521	2.31401	0.123625	3.11994	0.0177177	2.0927	0.670751		113.216	2.34858	118.353	3.48549	223.931	53.5326	113.216	2.34858
CR15-50	128.902	1732.14	1.72025	24.99	8.78926	0.0977151	8.95959	0.017718	1.73874	0.194064		113.218	1.95137	94.665	8.0984	NA	NA	113.218	1.95137
CR15-39	46.3535	3688.72	2.67529	24.1939	3.33762	0.101319	4.03677	0.0177863	2.27064	0.56249		113.65	2.55798	97.9933	3.7709	NA	NA	113.65	2.55798
CR15-78	277.679	18954.7	1.87828	18.2689	2.65976	0.134251	3.70791	0.0177958	2.58347	0.696744		113.711	2.91192	127.911	4.45627	401.509	59.5844	113.711	2.91192
CR15-97	700.626	6436.79	2.44365	21.3947	0.864132	0.115249	2.06291	0.0178908	1.8732	0.908037		114.312	2.12241	110.755	2.16459	35.9741	20.6781	114.312	2.12241
CR15-15	178.303	5010.3	2.04348	21.8778	2.16975	0.11283	2.9071	0.0179109	1.93479	0.66554		114.439	2.19462	108.551	2.99287	NA	NA	114.439	2.19462
CR15-57	2066.07	216704	7.86351	20.4728	0.922383	0.122562	2.36361	0.0182063	2.1762	0.920711		116.31	2.50844	117.393	2.62031	140.427	21.6516	116.31	2.50844
CR15-67	170.391	6485.62	1.85186	20.9306	2.02721	0.120418	2.6911	0.0182877	1.76987	0.657676		116.825	2.04904	115.451	2.93679	88.265	48.0406	116.825	2.04904
CR15-101	95.8004	14409	3.36198	22.0865	2.01338	0.114301	3.09688	0.0183175	2.35308	0.759823		117.014	2.72859	109.893	3.22556	NA	NA	117.014	2.72859
CR15-105	41.2125	831.657	2.81365	31.0228	5.02478	0.0813942	5.76759	0.0183215	2.83138	0.490912		117.039	3.28392	79.4549	4.40795	NA	NA	117.039	3.28392
CR15-40	225.431	17314.8	2.98159	20.8081	1.4735	0.122377	2.44366	0.0184765	1.94943	0.797749		118.02	2.27979	117.225	2.70541	102.138	34.8429	118.02	2.27979
CR15-95	315.533	7053.11	1.83168	21.4491	1.44404	0.119276	2.22574	0.0185631	1.69372	0.760968		118.568	1.98985	114.415	2.40835	29.9049	34.6069	118.568	1.98985
CR15-2	71.7194	1271.2	1.50796	25.3699	10.5057	0.101811	10.799	0.0187413	2.49981	0.231484		119.696	2.96456	98.4463	10.1325	NA	NA	119.696	2.96456
CR15-46	215.672	36248.2	2.80495	20.8876	1.81055	0.123702	2.9047	0.018748	2.27139	0.781969		119.738	2.69462	118.423	3.24683	93.1264	42.8847	119.738	2.69462
CR15-16	77.8744	1284.99	3.43101	25.7007	2.67855	0.102114	3.91633	0.0190422	2.8571	0.729535		121.6	3.44166	98.7258	3.68442	NA	NA	121.6	3.44166
CR15-102	533.008	5502.17	1.70839	21.02	1.11567	0.12617	2.36902	0.0192432	2.08987	0.882166		122.871	2.54353	120.651	2.69497	78.1061	26.5012	122.871	2.54353
CR15-82	65.319	1093.75	6.23053	29.9291	8.24609	0.100394	8.51736	0.0218018	2.13245	0.250365		139.033	2.93306	97.1404	7.89051	NA	NA	139.033	2.93306
CR15-79	254.912	8958.49	1.526	20.773	1.54378	0.146034	2.48138	0.0220112	1.94268	0.782902		140.354	2.69715	138.405	3.21057	106.101	36.4582	140.354	2.69715
CR15-11	1098.1	20066	3.10777	20.5223	1.01782	0.149014	2.07152	0.0221892	1.80423	0.870968		141.477	2.52476	141.041	2.72786	134.735	23.8997	141.477	2.52476
CR15-44	154.541	3039.62	2.97579	22.3325	2.89411	0.137487	3.49417	0.0222785	1.95789	0.56033		142.04	2.75057	130.803	4.28835	NA	NA	142.04	2.75057
CR15-35	153.569	8613.99	3.87739	21.1738	1.68476	0.152553	2.49206	0.0234372	1.83628	0.736853		149.343	2.71083	144.163	3.34926	60.7973	40.1492	149.343	2.71083
CR15-31	2746.32	36958.6	0.930953	20.5869	0.844693	0.160489	2.04729	0.0239731	1.86491	0.910917		152.717	2.81458	151.131	2.87485	127.369	19.8572	152.717	2.81458
CR15-14	191.389	12332.3	1.91482	21.1425	1.49701	0.16161	2.44983	0.0247921	1.93924	0.791581		157.871	3.02432	152.112	3.4608	64.2879	35.6396	157.871	3.02432
CR15-51	33.6819	467.801	2.45303	61.5625	15.2485	0.0555775	15.5088	0.0248258	2.82967	0.182456		158.083	4.41883	54.92	8.29136	NA	NA	158.083	4.41883
CR15-83	282.752	7912.21	3.90449	20.9502	1.72513	0.165327	2.96136	0.0251316	2.40699	0.812798		160.006	3.80393	155.356	4.26599	86.0433	40.9171	160.006	3.80393
CR15-19	160.895	5653.78	1.92932	21.0275	3.17586	0.168787	3.5696	0.0257522	1.62969	0.456549		163.908	2.63752	158.366	5.23427	77.256	75.4737	163.908	2.63752
CR15-21	302.683	3626.74	1.47991	22.0823	4.65533	0.163252	4.92132	0.0261572	1.59604	0.324311		166.453	2.62265	153.546	7.01301	NA	NA	166.453	2.62265
CR15-100	191.982	6113.79	1.60237	20.4574	1.48801	0.182796	2.65033	0.0271335	2.19319	0.827515		172.583	3.73485	170.464	4.15902	142.16	34.9034	172.583	3.73485
CR15-49	130.442	4608.35	2.73933	21.4685	3.91952	0.18893	4.74492	0.02943	2.67425	0.563603		186.98	4.92849	175.715	7.65616	27.7621	93.989	186.98	4.92849
CR15-1	374.812	42560.8	2.08165	19.9034	0.841309	0.215682	2.41703	0.0311479	2.26588	0.937466		197.729	4.41229	198.309	4.35419	206.233	19.538	197.729	4.41229
CR15-41	1331.56	139315	1.21632	19.4268	1.07376	0.295146	2.50247	0.041603	2.2604	0.903267		262.762	5.82006	262.602	5.79059	262.154	24.6675	262.762	5.82006
CR15-61	147.137	4496.05	1.30159	17.9639	2.3195	0.404559	3.51229	0.0527316	2.63745	0.750919		331.27	8.51639	344.949	10.2725	439.095	51.6241	331.27	8.51639
CR15-99	420.101	430781	6.76586	13.5137	0.703542	1.73412	1.99842	0.170036	1.87048	0.935981		1012.31	17.5232	1021.28	12.8707	1041.42	14.2169	1041.42	14.2169
CR15-56	265.163	37286.8	4.72859	9.31137	0.724006	4.1944	1.77815	0.283381	1.62408	0.913354		1608.37	23.1177	1672.93	14.5802	1755.67	13.2459	1755.67	13.2459
RP-1 (SG-9)
SG9-61	462.739	2412.64	1.92871	19.1333	84.5506	0.020162	87.6307	0.00279784	23.0292	0.262799		18.0108	4.14197	20.2685	17.5871	297.009	2497.34	18.0108	4.14197
SG9-63	450.341	4950.03	2.30293	15.6958	40.945	0.0250695	41.3739	0.00285382	5.94187	0.143614		18.3707	1.09001	25.1413	10.2745	732.081	904.329	18.3707	1.09001
SG9-21	945.916	6356.78	1.21108	23.5537	18.8229	0.0172853	19.3658	0.00295279	4.55317	0.235115		19.0069	0.864142	17.4012	3.34118	-199.371	475.025	19.0069	0.864142
SG9-6	394.171	3149.98	0.935622	23.6585	80.0453	0.0216454	80.7377	0.00371409	10.5516	0.13069		23.8982	2.51698	21.7439	17.3706	-210.511	2453.43	23.8982	2.51698
SG9-73	967.787	10335.9	3.39572	24.1063	12.764	0.0235744	13.7887	0.00412164	5.21616	0.378292		26.5152	1.38024	23.6593	3.22461	-257.807	324.554	26.5152	1.38024
SG9-52	204.256	1530.71	2.41087	22.8873	23.9249	0.0841352	24.6325	0.0139659	5.86185	0.237972		89.4073	5.20475	82.0253	19.4127	-127.971	598.263	89.4073	5.20475
SG9-90	322.361	9740.95	4.29648	19.4159	11.4214	0.100282	11.8825	0.0141215	3.27806	0.275872		90.3963	2.94257	97.037	10.9971	263.437	262.943	90.3963	2.94257
SG9-39	364.277	10946.3	1.75798	20.6354	9.32937	0.0946424	10.2237	0.0141644	4.18177	0.409027		90.6686	3.76502	91.8188	8.9756	121.793	220.178	90.6686	3.76502
SG9-100	125.277	3660.64	2.123	22.6514	27.8268	0.0865127	29.5681	0.0142126	9.99715	0.338106		90.9754	9.03108	84.2496	23.91	-102.443	695.507	90.9754	9.03108
SG9-36	239.537	6002.25	2.22642	21.3898	14.5904	0.0918348	15.2014	0.0142466	4.26673	0.28068		91.1916	3.86351	89.2112	12.9834	36.5199	350.825	91.1916	3.86351
SG9-15	914.573	21793.8	5.70751	20.9663	3.93357	0.0937258	5.08663	0.0142521	3.22503	0.634021		91.2266	2.92136	90.9682	4.42602	84.1707	93.3313	91.2266	2.92136
SG9-77	186.842	5915.61	1.6379	20.7191	28.4731	0.0950065	28.6966	0.0142765	3.57439	0.124558		91.3817	3.2433	92.1565	25.2863	112.27	684.104	91.3817	3.2433
SG9-30	210.253	4212.89	1.44754	28.9922	21.0425	0.0680393	22.414	0.0143067	7.72009	0.344431		91.5734	7.01958	66.8371	14.4994	-749.469	595.704	91.5734	7.01958
SG9-1	108.676	4030.74	2.51305	12.9561	96.2433	0.152706	96.6964	0.0143493	9.35012	0.0966957		91.844	8.52665	144.298	130.789	1125.94	#VALUE!	91.844	8.52665
SG9-57	137.511	3290.74	3.07039	23.8486	33.5065	0.083444	33.8555	0.014433	4.84845	0.14321		92.3761	4.44687	81.3777	26.4817	-230.644	865.246	92.3761	4.44687
SG9-8	668.386	25531.8	5.01561	21.165	4.47707	0.09545	5.92483	0.0146519	3.88066	0.654982		93.7666	3.61243	92.5676	5.24196	61.7725	106.688	93.7666	3.61243
SG9-33	408.662	13345.2	1.80945	20.8319	14.2132	0.0971728	14.8622	0.0146816	4.34382	0.292274		93.9555	4.05166	94.1633	13.3662	99.4407	337.682	93.9555	4.05166
SG9-27	226.022	6466.48	1.92353	25.9167	22.3744	0.0782789	22.6438	0.0147137	3.48266	0.153802		94.1598	3.25544	76.5256	16.6929	-444.813	594.934	94.1598	3.25544
SG9-20	316.059	6703.3	4.30847	20.1132	9.1841	0.100894	9.6333	0.014718	2.90735	0.301802		94.1866	2.71843	97.6016	8.96474	181.832	214.353	94.1866	2.71843
SG9-99	96.9831	7653.51	1.72183	23.9907	56.6161	0.084916	57.0029	0.0147751	6.62943	0.1163		94.5498	6.22237	82.7564	45.3324	-245.641	1546.27	94.5498	6.22237
SG9-51	319.414	9612.81	0.883567	22.5645	17.3761	0.0905205	17.924	0.014814	4.39793	0.245366		94.7965	4.13858	87.9881	15.1081	-93.0016	429.06	94.7965	4.13858
SG9-14	495.469	7487.5	5.13233	21.9733	9.36522	0.0931367	9.99031	0.0148428	3.47835	0.348173		94.9795	3.2795	90.4212	8.64303	-28.2608	227.378	94.9795	3.2795
SG9-54	123.795	2943.78	1.991	27.8382	30.7294	0.0735287	31.3376	0.0148456	6.14388	0.196054		94.9972	5.79372	72.0425	21.7974	-636.846	858.251	94.9972	5.79372
SG9-13	388.447	10293.8	3.27095	21.168	17.9123	0.0969531	18.0609	0.0148847	2.31204	0.128014		95.2457	2.18593	93.9599	16.2099	61.4148	429.701	95.2457	2.18593
SG9-11	484.909	14618.7	5.79212	19.7485	9.9102	0.103949	10.0904	0.0148885	1.89842	0.188141		95.2702	1.79533	100.415	9.64764	224.32	229.591	95.2702	1.79533
SG9-5	263.011	8976.07	2.02868	20.5265	21.1158	0.10002	21.414	0.0148902	3.56177	0.166329		95.2805	3.36872	96.7946	19.7728	134.275	501.141	95.2805	3.36872
SG9-49	379.815	10484.1	1.68169	23.0894	6.94143	0.0892815	7.82813	0.0149511	3.61886	0.462289		95.6674	3.4365	86.8339	6.51501	-149.736	172.381	95.6674	3.4365
SG9-37	126.114	2673.3	0.917742	32.7342	58.8329	0.0637374	59.1992	0.0151319	6.57483	0.111063		96.8161	6.31794	62.739	36.0319	-1103.5	1929.05	96.8161	6.31794
SG9-50	201.52	5597.4	2.52778	21.7637	20.7998	0.0961697	21.3769	0.0151799	4.93398	0.230808		97.1208	4.75601	93.2345	19.0453	-5.08596	506.503	97.1208	4.75601
SG9-18	1045.97	22031.7	3.76986	20.8167	3.59395	0.100686	4.97857	0.0152013	3.44524	0.692014		97.2568	3.32558	97.4097	4.62428	101.136	85.0204	97.2568	3.32558
SG9-65	398.463	7088.74	4.2366	21.8992	10.278	0.096094	10.725	0.0152624	3.06377	0.285667		97.6443	2.96905	93.1644	9.54744	-20.076	249.233	97.6443	2.96905
SG9-64	412.504	6560.06	2.75503	23.2857	12.3604	0.0904448	13.2563	0.0152746	4.79068	0.361388		97.7222	4.64625	87.9177	11.1648	-170.784	308.882	97.7222	4.64625
SG9-79	336.166	4779.94	3.92678	21.7338	9.78549	0.0969885	13.4607	0.0152882	9.24306	0.686671		97.8081	8.97223	93.9927	12.0847	-1.77306	236.428	97.8081	8.97223
SG9-96	155.587	8600.02	2.71859	21.2205	29.4172	0.099354	29.8911	0.0152911	5.30142	0.177358		97.827	5.14707	96.1799	27.4363	55.5371	715.132	97.827	5.14707
SG9-17	916.69	36315.1	4.15572	20.584	3.46483	0.102653	3.93252	0.0153251	1.86002	0.472983		98.0423	1.8098	99.2227	3.71738	127.702	81.5606	98.0423	1.8098
SG9-56	342.058	7799.01	3.19705	21.9475	10.9194	0.0964721	11.3954	0.0153563	3.2592	0.28601		98.2404	3.17758	93.5146	10.1807	-25.4129	265.131	98.2404	3.17758
SG9-16	904.468	14664.1	3.97432	20.9035	4.09515	0.101543	6.28212	0.0153946	4.7639	0.758327		98.4836	4.65601	98.1998	5.88017	91.2983	97.0391	98.4836	4.65601
SG9-38	585.911	1203.88	2.03863	19.1888	11.7634	0.111021	12.514	0.0154508	4.26887	0.341127		98.8405	4.18719	106.899	12.6979	290.423	269.577	98.8405	4.18719
SG9-82	515.432	14008.9	2.6972	21.07	5.67444	0.101803	6.01316	0.0155569	1.98968	0.330888		99.514	1.96481	98.439	5.64147	72.4575	134.999	99.514	1.96481
SG9-83	1785.59	68318.4	3.34681	21.365	2.28755	0.100844	3.07372	0.0156261	2.05302	0.667927		99.9536	2.03624	97.555	2.85904	39.337	54.7307	99.9536	2.03624
SG9-76	849.387	26905	2.76204	19.7192	4.30716	0.109518	4.74729	0.0156629	1.99627	0.420508		100.187	1.98454	105.524	4.75804	227.76	99.5578	100.187	1.98454
SG9-69	441.61	17832.1	2.79944	21.5131	11.6175	0.100793	12.2731	0.0157265	3.95753	0.322457		100.59	3.95	97.508	11.411	22.7462	279.604	100.59	3.95
SG9-78	641.168	22839.7	2.46934	20.9768	6.86863	0.103487	7.43957	0.0157443	2.85815	0.384182		100.703	2.85589	99.99	7.0844	82.9902	163.143	100.703	2.85589
SG9-85	1265.62	32711	3.75344	20.5381	2.18245	0.10576	3.02438	0.0157537	2.09376	0.692293		100.763	2.09334	102.08	2.93718	132.948	51.3166	100.763	2.09334
SG9-53	701.298	15305.7	1.98913	19.832	6.07239	0.10988	7.00266	0.0158047	3.4876	0.49804		101.087	3.498	105.856	7.03953	214.587	140.755	101.087	3.498
SG9-22	1122.55	32465.5	2.09701	20.7343	3.03224	0.105102	3.54182	0.0158052	1.8303	0.516769		101.09	1.83582	101.475	3.42032	110.514	71.5788	101.09	1.83582
SG9-9	389.26	13536.9	2.91336	21.2449	9.29181	0.102782	9.45903	0.0158369	1.77072	0.187199		101.292	1.77957	99.3412	8.9519	52.7742	222.153	101.292	1.77957
SG9-10	1082.58	23903.5	2.85861	20.6972	5.07892	0.105594	5.35462	0.0158508	1.69605	0.316744		101.379	1.70599	101.927	5.19287	114.733	119.855	101.379	1.70599
SG9-75	886.468	33146.9	2.82868	21.5629	5.33119	0.101462	5.83267	0.0158675	2.36609	0.405662		101.486	2.38244	98.125	5.45551	17.185	128.152	101.486	2.38244
SG9-81	923.97	43439.6	3.00835	20.4778	4.83093	0.107211	5.61346	0.0159229	2.85885	0.509285		101.837	2.88849	103.411	5.51917	139.836	113.492	101.837	2.88849
SG9-59	900.994	29320.6	2.01951	20.9094	6.33045	0.105118	6.82965	0.0159412	2.5631	0.37529		101.953	2.5926	101.49	6.59636	90.6252	150.135	101.953	2.5926
SG9-94	1244	29509.6	3.01653	20.9129	3.81744	0.105219	4.04251	0.0159591	1.33005	0.329017		102.067	1.34685	101.583	3.90778	90.245	90.4813	102.067	1.34685
SG9-46	1237.02	80435.6	1.92449	20.8563	4.21148	0.10552	5.13193	0.0159614	2.93259	0.571441		102.081	2.97005	101.859	4.97374	96.6732	99.7188	102.081	2.97005
SG9-93	659.358	17195.1	2.07947	21.1002	6.98125	0.10463	7.59645	0.0160119	2.99469	0.394223		102.402	3.04239	101.042	7.30616	69.0685	166.261	102.402	3.04239
SG9-7	955.074	30653.4	3.95053	20.9413	2.74925	0.105441	3.1011	0.0160145	1.43471	0.462646		102.418	1.45779	101.786	3.00345	87.0477	65.1897	102.418	1.45779
SG9-86	740.876	24265.6	2.94159	20.8926	4.39136	0.105893	4.9334	0.0160457	2.24819	0.455709		102.616	2.28875	102.202	4.79661	92.521	104.053	102.616	2.28875
SG9-80	1279.25	39408.3	4.23892	20.3279	2.5023	0.108953	3.34574	0.0160631	2.22092	0.663806		102.727	2.2634	105.007	3.33773	157.088	58.575	102.727	2.2634
SG9-98	937.284	66577.7	2.12855	21.0003	3.68155	0.105576	4.43837	0.0160801	2.47898	0.558533		102.835	2.52902	101.911	4.30361	80.3302	87.4091	102.835	2.52902
SG9-2	1275.84	31964	2.66025	21.439	2.64372	0.103803	2.76947	0.0161404	0.825054	0.29791		103.217	0.844814	100.281	2.64452	31.0094	63.3556	103.217	0.844814
SG9-31	507.429	53429.1	2.0365	20.9199	10.0719	0.106488	10.3119	0.016157	2.21173	0.214484		103.322	2.26698	102.748	10.0771	89.477	239.221	103.322	2.26698
SG9-35	1091.17	24484.5	1.63632	20.2312	2.86963	0.110425	3.61246	0.0162027	2.19434	0.607435		103.612	2.25543	106.354	3.64765	168.191	67.0411	103.612	2.25543
SG9-88	713.185	27928.2	3.05974	21.094	5.17982	0.106399	5.49603	0.0162778	1.83736	0.334306		104.089	1.89713	102.666	5.36674	69.7938	123.292	104.089	1.89713
SG9-55	649.719	2490.3	2.36146	20.8301	9.33766	0.107874	10.4173	0.0162969	4.61829	0.443328		104.21	4.77403	104.018	10.2997	99.6234	221.306	104.21	4.77403
SG9-41	1074.97	54897	1.8268	21.0147	3.68439	0.107053	4.78401	0.0163163	3.05155	0.637865		104.333	3.15814	103.266	4.69738	78.701	87.5035	104.333	3.15814
SG9-60	428.445	17447.2	3.11766	19.3218	12.6476	0.116737	12.9224	0.0163589	2.65087	0.205138		104.603	2.75051	112.109	13.7169	274.579	290.752	104.603	2.75051
SG9-34	1013.84	30024	1.37557	20.4637	3.95122	0.110223	4.29672	0.016359	1.68809	0.392879		104.603	1.75155	106.17	4.33145	141.438	92.7802	104.603	1.75155
SG9-29	383.018	3703.31	1.75265	21.5836	18.3492	0.104577	20.5896	0.0163704	9.34003	0.453629		104.676	9.69783	100.993	19.7958	14.8852	444.198	104.676	9.69783
SG9-24	1193.44	4812.16	2.19602	20.4169	4.24055	0.110667	5.27217	0.0163873	3.13265	0.594186		104.783	3.25596	106.576	5.33407	146.846	99.484	104.783	3.25596
SG9-4	1039.84	49644.7	2.7059	20.6746	3.58301	0.109302	4.17143	0.0163894	2.13608	0.512074		104.797	2.22044	105.327	4.17345	117.312	84.5078	104.797	2.22044
SG9-45	993.975	27909.9	2.01162	21.1333	4.33379	0.107356	4.67036	0.0164549	1.74085	0.372744		105.212	1.81671	103.544	4.59753	65.3219	103.2	105.212	1.81671
SG9-40	1690.7	76153.7	2.0493	21.0138	2.09906	0.108524	3.60736	0.0165397	2.93377	0.813273		105.75	3.07715	104.614	3.58594	78.8043	49.8694	105.75	3.07715
SG9-47	1749.53	25279	2.17144	20.6618	1.48464	0.111232	2.67318	0.0166685	2.223	0.831594		106.566	2.3495	107.092	2.71697	118.82	35.0188	106.566	2.3495
SG9-67	169.267	3939.05	2.47126	24.877	18.7194	0.0927173	19.3102	0.0167285	4.74	0.245466		106.947	5.02746	90.0315	16.6383	-338.209	485.584	106.947	5.02746
SG9-95	353.961	10450.1	1.35812	21.232	9.34291	0.109037	10.0608	0.0167906	3.73235	0.370978		107.34	3.97314	105.084	10.044	54.2349	223.319	107.34	3.97314
SG9-28	111.47	4103.1	1.79883	27.1287	26.3693	0.0858059	27.4596	0.0168828	7.66072	0.278982		107.925	8.19903	83.5888	22.0372	-566.644	721.938	107.925	8.19903
SG9-23	483.451	14640.9	1.78762	20.7133	12.4274	0.112958	12.5319	0.0169693	1.6147	0.128847		108.473	1.73686	108.668	12.9154	112.904	294.212	108.473	1.73686
SG9-42	413.276	8581.18	2.67406	23.3446	10.9565	0.100873	12.7112	0.0170789	6.44429	0.506977		109.168	6.97587	97.582	11.827	-177.08	273.951	109.168	6.97587
SG9-12	173.48	4658.75	1.86859	26.9758	23.8817	0.0874546	24.5585	0.0171102	5.72547	0.233136		109.367	6.20893	85.1294	20.0567	-551.404	650.069	109.367	6.20893
SG9-89	150.891	6459.03	3.10679	23.9868	27.0671	0.0984625	27.957	0.0171294	6.99749	0.250295		109.488	7.59673	95.3561	25.4505	-245.232	694.912	109.488	7.59673
SG9-44	141.734	2668.4	1.62547	18.9454	30.3375	0.125367	31.7804	0.0172261	9.46746	0.297902		110.101	10.3353	119.926	35.9634	319.509	704.055	110.101	10.3353
SG9-71	275.955	10402.5	2.20302	23.5707	17.9818	0.101718	18.0726	0.0173887	1.80926	0.100111		111.131	1.99342	98.3606	16.944	-201.181	453.662	111.131	1.99342
SG9-91	91.3586	4170.53	1.89082	19.9073	16.6489	0.145634	17.3925	0.0210269	5.03128	0.289279		134.143	6.67935	138.05	22.4533	205.777	388.532	134.143	6.67935
SG9-66	106.317	2396.57	5.77912	37.6156	62.1133	0.0772705	62.3082	0.0210805	4.92492	0.0790414		134.481	6.55448	75.5755	45.4102	-1547.02	466.654	134.481	6.55448
SG9-84	212.191	10459.6	1.96086	22.3847	15.3979	0.140405	15.6944	0.0227946	3.03636	0.193468		145.294	4.36229	133.404	19.6223	-73.4116	378.28	145.294	4.36229
SG9-32	508.895	12839.3	1.46923	20.3591	2.58725	0.170305	4.908	0.0251469	4.17069	0.849773		160.103	6.59516	159.684	7.25222	153.467	60.6287	160.103	6.59516
SG9-43	374.777	12850.8	1.15832	19.4321	3.50315	0.193453	4.63751	0.0272642	3.03882	0.655269		173.403	5.19916	179.571	7.63295	261.54	80.4762	173.403	5.19916
SG9-97	137.908	16146.5	2.54428	21.9942	9.77393	0.253599	10.4371	0.0404533	3.66102	0.35077		255.642	9.17597	229.495	21.4419	-30.5621	237.422	255.642	9.17597
SG9-58	71.4235	38117.2	4.80458	9.10786	1.38431	4.67929	2.16312	0.309098	1.66216	0.768409		1736.26	25.2998	1763.54	18.0985	1796	25.1975	1796	25.1975
RP-2 (JG-TR8)
JG-TR8-60	326.177	10083.4	1.74599	21.0107	3.00057	0.0207701	3.35884	0.00316641	1.50944	0.449393		20.3798	0.307135	20.8736	0.693954	78.1166	71.2726	20.3798	0.307135
JG-TR8-108	346.279	58353	1.58796	21.0228	2.56151	0.0224195	3.09915	0.00341982	1.74453	0.562905		22.008	0.38328	22.5129	0.69003	76.7537	60.8477	22.008	0.38328
JG-TR8-16	141.579	718.162	1.50845	36.0602	7.05435	0.0133892	7.22151	0.00350325	1.54478	0.213914		22.5439	0.347646	13.505	0.968807	NA	NA	22.5439	0.347646
JG-TR8-182	85.2078	694.291	0.808489	41.4297	33.2712	0.0116715	33.3093	0.00350853	1.59317	0.0478295		22.5778	0.359073	11.7824	3.90196	NA	NA	22.5778	0.359073
JG-TR8-186	402.515	9602.72	1.01382	21.5989	1.86511	0.0237641	2.25834	0.00372427	1.27336	0.56385		23.9636	0.304577	23.8474	0.532281	12.136	44.8335	23.9636	0.304577
JG-TR8-142	1063.22	145576	1.27798	21.2555	1.47605	0.0241778	1.94877	0.00372886	1.2724	0.652925		23.9931	0.304722	24.2577	0.467125	50.5554	35.2654	23.9931	0.304722
JG-TR8-114	450.927	20106.3	2.73165	21.4001	1.31767	0.0862672	1.77614	0.0133952	1.19098	0.670544		85.7777	1.01483	84.0201	1.43224	34.3472	31.5393	85.7777	1.01483
JG-TR8-79	574.693	9713.02	1.49299	21.2933	0.942839	0.0880456	1.43126	0.0136031	1.07683	0.752364		87.1003	0.931614	85.6812	1.17601	46.2916	22.5373	87.1003	0.931614
JG-TR8-42	478.704	22665.2	1.70741	21.0513	1.16455	0.0913399	1.68286	0.0139517	1.21484	0.72189		89.3168	1.07757	88.7507	1.43014	73.5558	27.6686	89.3168	1.07757
JG-TR8-150	532.065	49569.3	3.83961	20.9877	1.16685	0.0918069	1.87609	0.0139807	1.46907	0.783049		89.501	1.30575	89.1852	1.60182	80.717	27.719	89.501	1.30575
JG-TR8-96	234.031	3893.01	0.48803	21.5006	2.32382	0.0908022	2.7399	0.0141656	1.45151	0.529768		90.6766	1.30697	88.2504	2.31588	23.1333	55.7527	90.6766	1.30697
JG-TR8-10	914.566	32594.4	8.28761	20.1583	0.917961	0.0970856	3.67036	0.0142003	3.55371	0.96822		90.8971	3.20755	94.0825	3.29802	175.594	21.421	90.8971	3.20755
JG-TR8-143	1400.26	114721	2.08747	21.0204	0.898357	0.093468	1.68132	0.0142558	1.4212	0.845285		91.2498	1.2877	90.7289	1.45928	77.0256	21.3338	91.2498	1.2877
JG-TR8-128	1070.69	89772.1	2.23087	20.5031	0.895925	0.0958544	1.66744	0.01426	1.40629	0.843387		91.2764	1.27457	92.9424	1.48094	135.915	21.0703	91.2764	1.27457
JG-TR8-151	240.232	14605.9	2.0445	20.8933	1.31886	0.0942273	1.78277	0.0142847	1.19953	0.672846		91.4336	1.08903	91.4337	1.55882	91.4133	31.2366	91.4336	1.08903
JG-TR8-32	441.35	20114.5	2.28624	21.0023	1.38123	0.0937852	1.95122	0.0142918	1.37821	0.706332		91.479	1.25187	91.0233	1.69879	79.0702	32.7984	91.479	1.25187
JG-TR8-122	585.071	9673.96	2.83894	21.6102	1.03543	0.0917371	1.68748	0.0143844	1.33247	0.789621		92.067	1.21805	89.1203	1.43978	10.923	24.8836	92.067	1.21805
JG-TR8-104	1444.88	27743.9	2.90431	21.0912	0.961655	0.0942582	1.66489	0.0144248	1.35908	0.816315		92.3238	1.24581	91.4624	1.45618	69.0688	22.8634	92.3238	1.24581
JG-TR8-187	670.707	37725.5	4.06203	20.2592	0.847372	0.0986142	1.74455	0.014496	1.52493	0.874112		92.7766	1.40465	95.4964	1.59004	163.944	19.8087	92.7766	1.40465
JG-TR8-155	334.493	7482.02	2.7928	20.9169	1.09922	0.0959091	2.01133	0.0145561	1.68439	0.837451		93.158	1.55786	92.993	1.78731	88.7874	26.045	93.158	1.55786
JG-TR8-159	458.061	48341.2	2.83586	20.8674	1.27233	0.096261	1.82598	0.0145749	1.30972	0.717272		93.278	1.21289	93.3191	1.62803	94.3919	30.1264	93.278	1.21289
JG-TR8-134	946.96	19700.7	2.15801	21.1983	0.965827	0.0952403	1.65205	0.0146491	1.34031	0.811304		93.749	1.24744	92.3733	1.45869	56.9615	23.0227	93.749	1.24744
JG-TR8-179	1373.85	53841.4	1.46921	20.8207	0.786919	0.097019	1.40671	0.0146568	1.16602	0.828896		93.7984	1.08579	94.0209	1.26322	99.6944	18.6326	93.7984	1.08579
JG-TR8-91	342.468	9501.53	3.44052	21.3127	1.29529	0.094873	1.86999	0.0146713	1.34874	0.721254		93.8903	1.25716	92.0327	1.64531	44.1131	30.9607	93.8903	1.25716
JG-TR8-76	231.391	10340.5	1.88175	20.9594	2.30169	0.0967618	2.81554	0.0147153	1.62156	0.575933		94.1698	1.51592	93.7828	2.52222	83.9268	54.6311	94.1698	1.51592
JG-TR8-115	295.229	15054.9	4.25393	21.5111	1.6341	0.0949855	2.14228	0.0148254	1.3853	0.64665		94.8694	1.30461	92.137	1.88693	21.9234	39.2044	94.8694	1.30461
JG-TR8-20	191.675	3069.7	1.16891	22.7931	1.88887	0.0898073	2.38571	0.0148526	1.45732	0.610853		95.042	1.3749	87.3239	1.99623	NA	NA	95.042	1.3749
JG-TR8-87	475.006	21703.7	4.53388	21.3611	1.17696	0.095886	1.82004	0.0148617	1.38828	0.762772		95.0994	1.31055	92.9716	1.61697	38.6843	28.1463	95.0994	1.31055
JG-TR8-180	96.2526	3795.06	1.39477	22.1485	2.51521	0.0925262	2.85177	0.0148695	1.34399	0.471282		95.1493	1.2694	89.8539	2.45232	NA	NA	95.1493	1.2694
JG-TR8-118	256.267	49727.4	5.67871	20.1807	1.34199	0.10169	1.84091	0.0148902	1.26016	0.684533		95.281	1.19187	98.3349	1.72537	173.007	31.3198	95.281	1.19187
JG-TR8-169	291.895	18394.3	2.93363	20.6351	1.29563	0.0995585	1.95523	0.0149064	1.46434	0.748933		95.3838	1.38646	96.3687	1.79758	120.788	30.5451	95.3838	1.38646
JG-TR8-129	301.122	105652	2.26124	20.4188	1.20828	0.100732	1.81862	0.014924	1.35921	0.747382		95.4958	1.28842	97.452	1.68989	145.609	28.3279	95.4958	1.28842
JG-TR8-75	98.8988	2665.33	1.15171	25.4778	2.40957	0.0807372	2.70619	0.0149253	1.23183	0.455191		95.5038	1.16777	78.8378	2.05278	NA	NA	95.5038	1.16777
JG-TR8-146	163.087	15423.1	1.40857	19.3344	1.65662	0.106604	1.88403	0.0149552	0.897316	0.476276		95.6933	0.85233	102.854	1.84288	272.084	37.973	95.6933	0.85233
JG-TR8-51	161.629	4307.57	3.34185	21.806	3.92269	0.0946358	4.03848	0.0149733	0.960129	0.237745		95.8088	0.913086	91.8127	3.54516	NA	NA	95.8088	0.913086
JG-TR8-8	265.449	8307.37	1.696	21.3616	1.82178	0.0967372	2.05152	0.0149939	0.943328	0.459819		95.9397	0.898325	93.7601	1.83737	38.628	43.572	95.9397	0.898325
JG-TR8-95	275.62	3923.31	2.39607	21.9573	1.73226	0.0941307	2.00146	0.0149968	1.00255	0.500909		95.9575	0.954897	91.344	1.74839	NA	NA	95.9575	0.954897
JG-TR8-170	350.938	12489.9	1.69623	21.2717	1.08132	0.0971818	1.83149	0.0149994	1.47821	0.807107		95.9745	1.40819	94.1716	1.64718	48.7156	25.8489	95.9745	1.40819
JG-TR8-106	485.181	20410.4	2.80478	20.7415	1.44654	0.0997393	2.2481	0.0150104	1.72089	0.765487		96.0445	1.64057	96.5357	2.07025	108.685	34.1591	96.0445	1.64057
JG-TR8-35	222.055	26779.6	2.39294	21.1057	1.73626	0.0981037	2.06134	0.0150236	1.11109	0.539015		96.1278	1.06015	95.0244	1.86992	67.4395	41.3053	96.1278	1.06015
JG-TR8-77	458.861	7433.7	3.37863	21.0045	1.23518	0.0987035	1.81202	0.0150429	1.3258	0.731671		96.2507	1.26661	95.5789	1.6529	78.8243	29.3261	96.2507	1.26661
JG-TR8-97	875.512	341240	3.09745	20.5638	1.04097	0.100927	1.47452	0.0150591	1.04431	0.708239		96.3534	0.99875	97.6315	1.37255	128.983	24.4697	96.3534	0.99875
JG-TR8-74	389.278	1.23782e+06	3.09523	20.8982	1.50732	0.0993702	2.32129	0.0150679	1.76533	0.760495		96.4092	1.68928	96.1948	2.13045	90.9058	35.7237	96.4092	1.68928
JG-TR8-153	621.779	15049.9	2.90787	20.9761	1.05742	0.0993408	1.61611	0.0151196	1.22215	0.756233		96.7378	1.17346	96.1677	1.48284	82.0299	25.1208	96.7378	1.17346
JG-TR8-93	562.089	7860.95	3.46692	17.8834	4.20582	0.116571	4.47797	0.0151261	1.53732	0.343307		96.7793	1.47669	111.958	4.74699	448.116	93.4923	96.7793	1.47669
JG-TR8-3	270.01	107609	1.6852	20.2811	1.36821	0.102849	1.73277	0.0151349	1.06325	0.61361		96.8348	1.0219	99.4028	1.6408	161.425	32.0057	96.8348	1.0219
JG-TR8-37	320.492	38208	4.55231	20.5003	1.00258	0.101836	1.6722	0.0151478	1.33831	0.800329		96.9165	1.28734	98.4697	1.56929	136.219	23.5727	96.9165	1.28734
JG-TR8-64	907.115	40874.1	2.93272	20.7103	1.03405	0.101004	1.64336	0.0151779	1.27726	0.777222		97.1082	1.23103	97.7025	1.53078	112.24	24.4053	97.1082	1.23103
JG-TR8-46	241.564	18798.7	3.63164	20.012	1.65121	0.104697	2.02488	0.0152025	1.17203	0.578815		97.2639	1.1314	101.103	1.9486	192.61	38.3994	97.2639	1.1314
JG-TR8-132	604.075	91129.6	3.4315	20.5829	0.923038	0.101798	1.44935	0.0152032	1.11742	0.770979		97.2684	1.07874	98.4345	1.3597	126.798	21.7268	97.2684	1.07874
JG-TR8-5	224.854	11446.5	2.92216	21.231	1.55538	0.0988349	1.99742	0.0152254	1.25319	0.627406		97.4097	1.21156	95.7003	1.82422	53.2811	37.1169	97.4097	1.21156
JG-TR8-130	444.376	19832.1	1.25354	20.5359	1.48454	0.102545	1.90494	0.0152797	1.19371	0.626641		97.7542	1.1581	99.1224	1.79899	132.163	34.9096	97.7542	1.1581
JG-TR8-65	318.921	25299.5	1.27212	18.4596	2.94348	0.11416	3.23363	0.0152906	1.33877	0.414015		97.8237	1.29975	109.764	3.36426	377.22	66.2291	97.8237	1.29975
JG-TR8-124	218.221	91752.7	2.08705	20.0774	1.83101	0.105304	2.30124	0.0153405	1.39394	0.605737		98.1405	1.35766	101.661	2.22615	184.973	42.6405	98.1405	1.35766
JG-TR8-163	384.56	10497.9	4.0907	21.3274	1.18218	0.0991729	1.80861	0.0153468	1.36877	0.756808		98.1806	1.33369	96.0126	1.65693	42.4749	28.284	98.1806	1.33369
JG-TR8-57	527.312	52090.8	3.50928	21.0464	0.980979	0.100627	1.65956	0.0153667	1.33859	0.806593		98.3065	1.30594	97.3548	1.54063	74.1021	23.3013	98.3065	1.30594
JG-TR8-136	862.904	76402.1	4.19455	21.0511	0.909507	0.100637	1.63483	0.0153717	1.35848	0.830961		98.3382	1.32577	97.3643	1.51781	73.5662	21.6344	98.3382	1.32577
JG-TR8-86	466.067	67974.7	3.76095	20.7324	1.15628	0.102271	1.61326	0.0153848	1.125	0.697346		98.4214	1.09883	98.8706	1.51985	109.722	27.3266	98.4214	1.09883
JG-TR8-67	917.216	27669.1	2.85349	20.9755	0.751602	0.101111	1.52265	0.0153886	1.32422	0.869682		98.4455	1.29374	97.8012	1.41971	82.0984	17.8495	98.4455	1.29374
JG-TR8-17	93.453	3145.1	1.77751	23.6688	2.33575	0.0896289	3.05459	0.0153926	1.96844	0.644422		98.4712	1.92362	87.1576	2.55125	NA	NA	98.4712	1.92362
JG-TR8-30	518.34	52283.2	4.33402	20.3965	1.21771	0.104188	1.68172	0.0154192	1.1599	0.68971		98.64	1.13542	100.635	1.61124	148.156	28.5449	98.64	1.13542
JG-TR8-162	1202.91	79865.8	1.20221	20.6497	0.734492	0.102924	1.4201	0.0154211	1.2154	0.855857		98.6523	1.1899	99.4714	1.34561	119.17	17.3038	98.6523	1.1899
JG-TR8-21	279.16	5782.65	1.47173	21.959	1.4492	0.0968147	1.80064	0.0154256	1.0687	0.593511		98.6807	1.04657	93.8318	1.61385	NA	NA	98.6807	1.04657
JG-TR8-56	525.401	23518	2.35562	20.76	1.2982	0.102455	1.7714	0.0154329	1.20522	0.680374		98.7272	1.18081	99.0402	1.67156	106.605	30.683	98.7272	1.18081
JG-TR8-103	606.935	18151.4	3.1003	20.6669	0.986934	0.10295	1.70713	0.015438	1.39293	0.815949		98.7594	1.36517	99.4961	1.61797	117.161	23.2668	98.7594	1.36517
JG-TR8-44	131.172	10465.1	1.65544	22.0118	2.31935	0.0966945	2.59005	0.0154435	1.1528	0.445087		98.7942	1.13021	93.7206	2.31875	NA	NA	98.7942	1.13021
JG-TR8-62	538.262	21528.6	2.44919	21.002	1.12283	0.10153	1.8963	0.0154719	1.52814	0.805853		98.9746	1.50092	98.1877	1.77474	79.0967	26.654	98.9746	1.50092
JG-TR8-82	493.229	10272.7	3.12244	21.0357	0.875276	0.10137	1.70494	0.0154723	1.46312	0.858164		98.9769	1.43709	98.0401	1.59337	75.2917	20.8123	98.9769	1.43709
JG-TR8-19	1009.28	154229	3.29696	20.6154	0.79674	0.1038	1.38023	0.0155266	1.12704	0.816565		99.3218	1.11082	100.278	1.31791	123.039	18.7689	99.3218	1.11082
JG-TR8-4	374.114	19384.2	3.13046	20.8897	1.42073	0.102759	1.99713	0.0155754	1.40359	0.702803		99.6318	1.38767	99.3199	1.88963	91.8612	33.637	99.6318	1.38767
JG-TR8-174	190.452	8635.15	3.74066	20.7788	2.28261	0.103799	2.45061	0.0156495	0.891735	0.363883		100.102	0.885751	100.277	2.33996	104.447	53.9561	100.102	0.885751
JG-TR8-164	193.106	62587	1.58453	21.2497	1.58195	0.101658	2.12705	0.0156741	1.42189	0.668481		100.258	1.41454	98.3059	1.99299	51.2158	37.7779	100.258	1.41454
JG-TR8-197	173.448	6744.47	0.843311	20.7992	1.68532	0.103974	2.02603	0.0156914	1.12449	0.555022		100.368	1.11988	100.438	1.9375	102.097	39.8661	100.368	1.11988
JG-TR8-194	660.71	40406.5	3.22174	20.609	0.95494	0.105087	1.47196	0.0157142	1.12016	0.760999		100.513	1.11717	101.461	1.42128	123.778	22.5126	100.513	1.11717
JG-TR8-190	736.856	91728.6	2.8602	20.5738	0.943714	0.105691	1.33988	0.0157776	0.95115	0.709876		100.915	0.952375	102.016	1.30047	127.84	22.2239	100.915	0.952375
JG-TR8-53	2745.16	585104	2.64049	20.7102	0.565081	0.105286	1.22766	0.0158213	1.08988	0.887768		101.192	1.09426	101.644	1.18742	112.25	13.337	101.192	1.09426
JG-TR8-148	710.891	25877.5	3.81494	21.2539	0.864386	0.102637	1.44225	0.0158282	1.15452	0.8005		101.236	1.15966	99.2078	1.36315	50.7391	20.6249	101.236	1.15966
JG-TR8-119	2051.71	89188.9	2.01353	20.6056	0.73202	0.10631	1.42188	0.0158945	1.21897	0.857294		101.657	1.22944	102.584	1.38736	124.157	17.2355	101.657	1.22944
JG-TR8-149	312.451	15383.1	3.89109	20.6978	1.65877	0.105865	2.14167	0.0158988	1.35471	0.632549		101.684	1.36672	102.176	2.08178	113.634	39.1464	101.684	1.36672
JG-TR8-199	1068.4	118652	3.09408	20.6746	0.930083	0.10603	1.50508	0.0159057	1.18331	0.786208		101.728	1.19431	102.327	1.46505	116.322	21.9409	101.728	1.19431
JG-TR8-173	625.742	30193.3	2.10981	20.4511	1.29943	0.107417	1.8153	0.0159395	1.2676	0.698285		101.942	1.28205	103.599	1.78788	141.884	30.4819	101.942	1.28205
JG-TR8-176	1509.44	34006.9	2.90962	20.8354	0.910986	0.105528	1.39347	0.0159536	1.05444	0.756706		102.032	1.0674	101.866	1.35059	98.0262	21.5673	102.032	1.0674
JG-TR8-38	407.893	21328.2	2.83309	20.6388	1.42936	0.106687	2.03818	0.0159765	1.45297	0.712876		102.177	1.47291	102.93	1.99507	120.394	33.6621	102.177	1.47291
JG-TR8-165	1587.15	114478	2.67926	20.7608	0.769442	0.106183	1.48692	0.0159951	1.27235	0.855698		102.295	1.29128	102.468	1.44926	106.514	18.1571	102.295	1.29128
JG-TR8-47	248.489	5799.27	3.67587	21.2169	1.91537	0.104264	2.34974	0.0160511	1.36111	0.579261		102.651	1.38612	100.705	2.25275	54.8948	45.6895	102.651	1.38612
JG-TR8-147	1235.62	36280.2	2.24629	20.6856	0.910205	0.107202	1.39671	0.0160901	1.05939	0.758495		102.898	1.08144	103.402	1.37313	115.073	21.454	102.898	1.08144
JG-TR8-177	636.788	16694	3.37842	20.6005	1.0671	0.107736	1.55012	0.0161037	1.12435	0.725333		102.984	1.14871	103.892	1.5308	124.74	25.1156	102.984	1.14871
JG-TR8-102	976.726	76890.1	2.75758	20.9631	0.952246	0.106003	1.4823	0.0161236	1.13598	0.766361		103.11	1.16199	102.303	1.44255	83.5007	22.5928	103.11	1.16199
JG-TR8-78	409.407	11706.6	2.81679	21.0766	1.19288	0.10549	1.94093	0.0161324	1.53109	0.788844		103.166	1.567	101.831	1.8806	70.6855	28.3592	103.166	1.567
JG-TR8-58	632.703	52079.9	2.41607	20.683	1.00585	0.107669	1.72439	0.0161581	1.40064	0.812252		103.329	1.43574	103.831	1.70195	115.371	23.7286	103.329	1.43574
JG-TR8-39	95.7458	5961.66	2.60844	15.1375	2.28961	0.147311	2.92195	0.0161799	1.81535	0.621279		103.468	1.86331	139.535	3.80942	807.386	47.923	103.468	1.86331
JG-TR8-112	717.467	19040.5	2.1657	21.0111	1.07123	0.106144	2.04447	0.0161819	1.74135	0.85174		103.48	1.78758	102.432	1.99202	78.0712	25.4463	103.48	1.78758
JG-TR8-126	852.955	19714.5	1.62211	20.9331	1.02033	0.106572	1.73446	0.0161869	1.40259	0.808662		103.512	1.44025	102.824	1.69612	86.9403	24.2065	103.512	1.44025
JG-TR8-116	509.667	39629.2	2.64775	19.8277	1.13695	0.112513	1.9638	0.016187	1.6012	0.815359		103.512	1.6442	108.262	2.01663	214.079	26.336	103.512	1.6442
JG-TR8-73	412.961	7230.5	2.98362	21.4655	0.975672	0.103948	1.47643	0.01619	1.10811	0.750534		103.532	1.13808	100.414	1.4116	27.0031	23.4068	103.532	1.13808
JG-TR8-27	669.306	198593	2.86109	20.751	1.17155	0.107605	1.8562	0.0162016	1.43977	0.775658		103.605	1.47976	103.772	1.83105	107.623	27.6961	103.605	1.47976
JG-TR8-183	693.967	32229.1	4.6158	20.7259	1.08944	0.107747	1.84298	0.0162034	1.4865	0.806577		103.616	1.52795	103.902	1.82018	110.456	25.7213	103.616	1.52795
JG-TR8-125	131.565	29197.5	2.8233	20.1791	1.74848	0.110825	2.17271	0.0162267	1.28976	0.593618		103.764	1.3276	106.72	2.20103	173.189	40.829	103.764	1.3276
JG-TR8-23	268.623	4038.21	2.37612	22.3777	1.26193	0.099955	1.68652	0.0162296	1.11888	0.663426		103.783	1.15191	96.7348	1.55615	NA	NA	103.783	1.15191
JG-TR8-1	450.815	25438.6	3.06202	20.8577	1.07366	0.107259	1.7267	0.0162326	1.35232	0.78318		103.802	1.39249	103.455	1.69837	95.4787	25.4293	103.802	1.39249
JG-TR8-99	811.775	37361.3	3.48069	20.0291	1.46852	0.111789	1.78645	0.016246	1.01728	0.569442		103.887	1.04835	107.6	1.82389	190.621	34.1407	103.887	1.04835
JG-TR8-117	403.52	280685	3.66371	20.6686	1.28634	0.108392	1.77371	0.0162554	1.22123	0.688516		103.947	1.25925	104.494	1.76124	116.971	30.317	103.947	1.25925
JG-TR8-48	500.032	17051.7	3.15491	20.7749	1.0943	0.107991	1.80846	0.0162784	1.43981	0.79615		104.093	1.4867	104.126	1.78974	104.861	25.8862	104.093	1.4867
JG-TR8-113	1889.4	104639	6.46686	20.6033	0.858308	0.109033	1.64038	0.0162998	1.39791	0.852188		104.228	1.4453	105.08	1.63752	124.421	20.2022	104.228	1.4453
JG-TR8-135	239.023	283579	3.00508	20.3942	1.55811	0.110178	1.89542	0.0163038	1.07931	0.569432		104.253	1.11617	106.128	1.91001	148.432	36.5254	104.253	1.11617
JG-TR8-0	788.621	25553	5.02966	20.5906	1.01238	0.109146	1.51418	0.0163067	1.12597	0.743619		104.272	1.16462	105.184	1.51296	125.924	23.825	104.272	1.16462
JG-TR8-29	232.267	11475.2	5.62658	21.2863	1.59172	0.105733	2.03771	0.0163305	1.27228	0.624366		104.423	1.31784	102.055	1.97849	47.1264	38.0308	104.423	1.31784
JG-TR8-85	601.418	144014	2.91851	20.4039	1.23667	0.110325	1.91045	0.0163333	1.45618	0.76222		104.441	1.50859	106.263	1.92748	147.323	28.9869	104.441	1.50859
JG-TR8-123	640.188	14425.4	3.08153	21.1069	0.849736	0.106699	1.62857	0.0163408	1.38931	0.853088		104.488	1.43997	102.941	1.59429	67.2979	20.2244	104.488	1.43997
JG-TR8-188	461.998	165080	2.56989	20.496	1.13991	0.109932	1.76964	0.0163487	1.3536	0.7649		104.538	1.40361	105.903	1.77969	136.748	26.7646	104.538	1.40361
JG-TR8-7	659.411	11143.8	2.74847	21.4086	0.958164	0.105277	1.84872	0.0163535	1.58104	0.855208		104.569	1.63993	101.636	1.78798	33.4123	22.9511	104.569	1.63993
JG-TR8-13	913.908	54863.2	3.10806	20.706	0.923161	0.108854	1.52349	0.0163542	1.21194	0.795501		104.573	1.25714	104.917	1.51859	112.725	21.7826	104.573	1.25714
JG-TR8-167	55.4921	5491.93	5.20165	20.9825	2.64181	0.107495	2.91087	0.0163657	1.22231	0.41991		104.646	1.26877	103.672	2.86882	81.313	62.6968	104.646	1.26877
JG-TR8-68	846.135	39349.2	3.99871	20.6644	1.01239	0.109224	1.66046	0.0163768	1.31614	0.792631		104.716	1.36708	105.255	1.66019	117.471	23.8657	104.716	1.36708
JG-TR8-55	1212.31	97320.4	2.80259	20.2255	1.0065	0.111774	1.52856	0.0164031	1.15041	0.752614		104.883	1.19683	107.587	1.5604	167.831	23.534	104.883	1.19683
JG-TR8-22	339.89	124748	3.16125	20.5474	1.18682	0.110086	1.91441	0.0164126	1.50214	0.784648		104.944	1.56363	106.044	1.92771	130.87	27.9142	104.944	1.56363
JG-TR8-140	491.925	9819.63	3.38572	20.7373	1.09434	0.109144	1.78508	0.0164225	1.41029	0.790046		105.006	1.4689	105.182	1.7836	109.165	25.8458	105.006	1.4689
JG-TR8-107	231.817	14452.3	5.35652	20.6669	1.88194	0.109712	2.11492	0.016452	0.964999	0.456281		105.194	1.00688	105.702	2.1231	117.159	44.368	105.194	1.00688
JG-TR8-175	177.898	5678.41	3.18937	22.0784	2.34524	0.103102	2.4933	0.0165166	0.846406	0.339472		105.603	0.886549	99.6352	2.36622	NA	NA	105.603	0.886549
JG-TR8-63	523.55	20563.3	4.49544	20.7701	1.00741	0.109887	1.65426	0.0165604	1.31214	0.793187		105.881	1.37796	105.862	1.66303	105.402	23.8178	105.881	1.37796
JG-TR8-141	960.712	86415.4	3.45716	20.7852	0.709464	0.109811	1.56765	0.016561	1.39793	0.891732		105.885	1.4681	105.792	1.57499	103.709	16.7622	105.885	1.4681
JG-TR8-184	459.783	4674.86	3.28143	14.0733	4.53102	0.162445	4.78785	0.0165878	1.54707	0.323124		106.055	1.62732	152.841	6.79377	958.171	92.6533	106.055	1.62732
JG-TR8-185	723.156	151041	3.75986	20.581	0.882558	0.111281	1.88124	0.0166178	1.66137	0.883126		106.245	1.75066	107.136	1.91281	127.022	20.7855	106.245	1.75066
JG-TR8-41	974.206	27170	5.52622	21.0242	0.946984	0.108986	1.42412	0.0166256	1.06364	0.746878		106.294	1.12132	105.037	1.42109	76.5864	22.4958	106.294	1.12132
JG-TR8-160	374.58	18004.6	2.99351	21.1113	0.97375	0.108663	1.73148	0.0166451	1.43173	0.826879		106.418	1.5111	104.742	1.72318	66.7596	23.1575	106.418	1.5111
JG-TR8-89	692.432	44329.9	3.7651	20.5372	0.784684	0.111786	1.38894	0.0166578	1.14605	0.825125		106.498	1.2105	107.598	1.41802	132.012	18.4619	106.498	1.2105
JG-TR8-154	371.115	17437.2	3.20088	21.0004	1.58347	0.109541	2.42554	0.0166914	1.83735	0.757502		106.711	1.94453	105.546	2.43149	79.2833	37.6159	106.711	1.94453
JG-TR8-109	945.589	252761	3.3797	20.3777	0.848645	0.113029	1.5144	0.0167123	1.25428	0.828234		106.844	1.32908	108.733	1.56155	150.284	19.873	106.844	1.32908
JG-TR8-157	643.194	7466.33	3.13753	14.1031	6.24043	0.16357	6.64177	0.0167381	2.2738	0.342348		107.007	2.41305	153.823	9.48064	953.811	127.761	107.007	2.41305
JG-TR8-18	292.186	17311.3	5.50584	18.0529	2.98651	0.127849	3.363	0.0167468	1.54613	0.459747		107.063	1.64166	122.163	3.87084	427.122	66.6131	107.063	1.64166
JG-TR8-25	164.144	3951.91	1.8578	22.1575	3.88298	0.104273	4.01974	0.0167642	1.03962	0.258629		107.173	1.10498	100.713	3.85414	NA	NA	107.173	1.10498
JG-TR8-66	251.376	11664.6	6.88137	13.8153	7.02676	0.167246	7.13588	0.016765	1.24314	0.17421		107.178	1.32136	157.026	10.3821	995.846	142.959	107.178	1.32136
JG-TR8-181	159.8	74606.9	1.98239	21.1312	1.70965	0.109516	2.04992	0.0167914	1.13105	0.551754		107.346	1.20408	105.522	2.05452	64.5644	40.7103	107.346	1.20408
JG-TR8-40	173.974	18186.3	2.11539	20.6474	1.65684	0.112207	2.07826	0.0168101	1.25461	0.603683		107.464	1.33708	107.982	2.12894	119.431	39.0759	107.464	1.33708
JG-TR8-12	255.047	100998	3.47011	20.7821	1.27494	0.111687	1.68833	0.0168414	1.10679	0.655554		107.663	1.18171	107.507	1.7223	104.087	30.1219	107.663	1.18171
JG-TR8-84	1591.31	615952	3.02846	20.5547	0.652429	0.113077	1.24974	0.0168646	1.06591	0.852913		107.809	1.1396	108.777	1.28914	130.009	15.3703	107.809	1.1396
JG-TR8-88	129.645	2997.98	2.23426	22.8363	2.82926	0.102925	3.02805	0.0170543	1.07906	0.356355		109.012	1.16642	99.4726	2.86925	NA	NA	109.012	1.16642
JG-TR8-61	89.1052	3317.75	2.05372	22.3217	2.69154	0.106298	2.99993	0.0172163	1.32484	0.441623		110.039	1.44546	102.573	2.92681	NA	NA	110.039	1.44546
JG-TR8-131	424.497	48627.4	1.8967	20.6495	1.12799	0.11523	1.75562	0.0172648	1.34531	0.766284		110.346	1.47186	110.738	1.84188	119.192	26.601	110.346	1.47186
JG-TR8-139	721.4	112517	2.85199	20.8677	1.00713	0.114036	1.68275	0.0172665	1.34809	0.801123		110.357	1.47505	109.65	1.74901	94.3148	23.8557	110.357	1.47505
JG-TR8-111	133.618	4519.35	3.04144	21.9161	1.9627	0.108732	2.28167	0.0172906	1.16354	0.509952		110.509	1.27486	104.805	2.27203	NA	NA	110.509	1.27486
JG-TR8-26	235.464	6392.33	2.75002	21.3711	2.80458	0.111694	3.14027	0.0173199	1.41266	0.449852		110.695	1.5504	107.514	3.20364	37.565	67.1113	110.695	1.5504
JG-TR8-72	143.387	28075.4	3.59114	20.8954	1.75173	0.114558	2.00856	0.0173685	0.982732	0.489272		111.003	1.08153	110.126	2.09622	91.1827	41.5022	111.003	1.08153
JG-TR8-145	309.63	236890	4.30971	20.8525	1.03143	0.114813	1.61497	0.0173715	1.2427	0.769486		111.022	1.36786	110.359	1.68883	96.0722	24.4061	111.022	1.36786
JG-TR8-198	386.815	11038.4	1.77449	21.2219	1.74735	0.115643	2.22698	0.017807	1.38064	0.619963		113.781	1.55713	111.114	2.34391	54.3179	41.6816	113.781	1.55713
JG-TR8-6	1443.7	177488	0.993091	19.1569	1.09867	0.1299	1.90809	0.018056	1.56005	0.817596		115.358	1.78364	124.008	2.22741	293.21	25.0882	115.358	1.78364
JG-TR8-192	49.0119	7427.87	5.92	20.276	2.87655	0.123333	3.14541	0.0181448	1.27242	0.404532		115.92	1.46181	118.09	3.50656	162.042	67.2597	115.92	1.46181
JG-TR8-90	322.601	10828.1	1.57056	20.815	1.38296	0.120262	1.7549	0.0181632	1.08032	0.615603		116.037	1.24236	115.31	1.9129	100.341	32.7135	116.037	1.24236
JG-TR8-24	280.217	250874	3.17513	19.8369	1.07546	0.126605	1.5286	0.0182227	1.08627	0.710634		116.413	1.25322	121.042	1.74423	212.965	24.9215	116.413	1.25322
JG-TR8-36	105.499	12293.1	2.4503	20.8429	1.69439	0.121063	2.05083	0.0183087	1.1554	0.56338		116.958	1.33914	116.036	2.24876	97.1356	40.1179	116.958	1.33914
JG-TR8-138	73.4253	3422.4	1.89467	22.8872	5.396	0.110426	5.52444	0.018338	1.18429	0.214374		117.143	1.37479	106.355	5.57832	NA	NA	117.143	1.37479
JG-TR8-59	121.41	9561.06	2.54959	21.7258	1.94717	0.116333	2.22056	0.0183386	1.06744	0.480706		117.147	1.23918	111.742	2.34965	NA	NA	117.147	1.23918
JG-TR8-158	75.2608	10248.3	2.44625	20.4946	2.41269	0.123826	2.70257	0.0184136	1.21772	0.450578		117.622	1.41932	118.534	3.02357	136.912	56.712	117.622	1.41932
JG-TR8-196	180.572	10979.8	3.15451	20.3698	1.91681	0.124634	2.16945	0.0184208	1.01605	0.468347		117.668	1.18472	119.264	2.44121	151.229	44.9165	117.668	1.18472
JG-TR8-80	442.465	80533.9	7.26969	20.5627	1.11073	0.124662	1.68646	0.0185995	1.26903	0.752479		118.799	1.49378	119.29	1.8981	129.116	26.1346	118.799	1.49378
JG-TR8-178	356.451	71345.8	1.76354	20.1519	1.23007	0.128546	1.83916	0.0187958	1.36728	0.743426		120.041	1.62611	122.79	2.12711	176.346	28.6691	120.041	1.62611
JG-TR8-166	219.117	20620.4	4.96813	20.7434	1.57158	0.124935	1.94299	0.0188042	1.14252	0.588023		120.094	1.3594	119.537	2.19109	108.445	37.1188	120.094	1.3594
JG-TR8-152	114.919	239691	1.84088	20.0835	1.80501	0.129081	2.23157	0.01881	1.31218	0.588008		120.131	1.56173	123.272	2.59047	184.269	42.036	120.131	1.56173
JG-TR8-161	61.4283	5043.08	3.16178	21.3576	2.22451	0.123158	2.50819	0.0190854	1.1587	0.461965		121.873	1.39888	117.931	2.79263	39.1285	53.2185	121.873	1.39888
JG-TR8-31	142.686	15375.6	2.97738	20.6817	2.36765	0.12737	2.61934	0.0191136	1.12034	0.427718		122.052	1.35453	121.732	3.00486	115.514	55.8501	122.052	1.35453
JG-TR8-43	179.567	6191.1	6.24906	21.1372	1.35475	0.125786	1.63426	0.0192916	0.914023	0.55929		123.177	1.11518	120.304	1.85407	63.8558	32.2678	123.177	1.11518
JG-TR8-110	50.4791	1121.71	2.17589	28.742	2.80174	0.0925222	3.13653	0.0192953	1.41	0.449541		123.201	1.72063	89.8502	2.6971	NA	NA	123.201	1.72063
JG-TR8-191	68.0077	1123.05	3.06263	26.677	1.82613	0.0998615	2.0869	0.0193296	1.01015	0.484043		123.417	1.23484	96.6485	1.92395	NA	NA	123.417	1.23484
JG-TR8-137	209.556	11349.1	4.97341	20.7509	1.53104	0.128648	2.01896	0.0193699	1.3161	0.651869		123.673	1.61214	122.882	2.33669	107.632	36.1472	123.673	1.61214
JG-TR8-49	200.865	34116.4	1.784	20.4797	1.45132	0.130473	1.82659	0.0193879	1.10909	0.607195		123.786	1.35981	124.522	2.14057	138.622	34.082	123.786	1.35981
JG-TR8-70	159.783	61154.5	1.60704	20.8864	1.58861	0.131324	1.90304	0.0199019	1.0478	0.550593		127.036	1.31805	125.287	2.24303	92.2281	37.6307	127.036	1.31805
JG-TR8-34	52.9637	2073.31	2.33703	23.6007	3.25539	0.121842	3.50447	0.0208645	1.29761	0.370273		133.118	1.70964	116.741	3.86474	NA	NA	133.118	1.70964
JG-TR8-193	81.6339	11827.8	1.56155	19.8705	2.14061	0.148274	2.68092	0.0213777	1.61404	0.602046		136.357	2.17775	140.387	3.51509	209.05	49.6234	136.357	2.17775
JG-TR8-9	674.173	37184.7	1.91667	20.2722	0.914889	0.155411	1.58532	0.0228596	1.29469	0.816673		145.704	1.86525	146.678	2.16517	162.443	21.3751	145.704	1.86525
JG-TR8-133	132.568	8848.69	2.26419	20.8295	1.64204	0.152281	1.91019	0.023015	0.975987	0.510937		146.683	1.41544	143.923	2.56327	98.6507	38.8491	146.683	1.41544
JG-TR8-156	44.9963	2787.36	0.740144	23.3788	2.98476	0.136312	3.22026	0.023123	1.20885	0.375387		147.363	1.76119	129.754	3.92248	NA	NA	147.363	1.76119
JG-TR8-69	239.94	96150.8	3.55727	19.8572	1.20543	0.162851	1.56347	0.0234637	0.995677	0.63684		149.509	1.4715	153.195	2.22323	210.615	27.94	149.509	1.4715
JG-TR8-189	67.7493	2725.67	3.15945	22.0398	2.29559	0.14684	2.6598	0.0234823	1.34343	0.505088		149.626	1.98698	139.118	3.45798	NA	NA	149.626	1.98698
JG-TR8-168	1031.06	73021	1.52801	19.7228	0.779565	0.165253	1.39521	0.0236485	1.1571	0.829339		150.673	1.72323	155.291	2.00908	226.33	18.0227	150.673	1.72323
JG-TR8-33	95.0936	4892.58	1.88436	20.4001	2.78145	0.161856	3.12615	0.0239578	1.427	0.456473		152.621	2.15233	152.326	4.42199	147.716	65.2482	152.621	2.15233
JG-TR8-83	115.358	25452.6	1.20928	19.884	1.59662	0.16892	1.88356	0.0243709	0.999303	0.530539		155.221	1.53261	158.481	2.7638	207.499	37.0287	155.221	1.53261
JG-TR8-50	51.1628	8749.43	4.07042	21.2725	2.79078	0.163884	2.99611	0.0252955	1.09007	0.363828		161.037	1.73367	154.097	4.28368	48.6266	66.658	161.037	1.73367
JG-TR8-98	274.695	24696.8	3.1291	20.3109	1.24614	0.17319	1.86446	0.0255235	1.38684	0.743834		162.47	2.22505	162.184	2.79472	158.013	29.1406	162.47	2.22505
JG-TR8-94	216.454	13916.7	1.3593	20.6349	1.03017	0.172826	1.55046	0.0258761	1.15874	0.747351		164.687	1.88411	161.868	2.31988	120.856	24.2721	164.687	1.88411
JG-TR8-171	200.373	10130.5	1.18582	20.7233	1.30499	0.174444	1.74566	0.0262303	1.15946	0.664194		166.912	1.91043	163.269	2.63278	110.774	30.8096	166.912	1.91043
JG-TR8-121	523.03	347599	1.87326	20.1376	0.913681	0.183233	1.5767	0.0267731	1.28498	0.81498		170.321	2.15993	170.838	2.47921	177.99	21.3176	170.321	2.15993
JG-TR8-45	2507.56	95365.5	4.28102	18.9748	0.907507	0.19864	3.17696	0.0273483	3.04458	0.958333		173.931	5.22467	183.974	5.34592	314.982	20.6633	173.931	5.22467
JG-TR8-71	112.938	17342.9	2.30405	19.7819	1.6606	0.192337	2.03792	0.0276069	1.18133	0.579675		175.553	2.04588	178.621	3.33797	219.434	38.4439	175.553	2.04588
JG-TR8-11	197.6	19388.8	2.03407	20.315	1.31133	0.204295	1.67033	0.0301136	1.0346	0.619398		191.259	1.94969	188.754	2.87712	157.539	30.6692	191.259	1.94969
JG-TR8-172	136.111	56456.3	4.11472	20.1183	1.31336	0.208706	1.59507	0.0304659	0.905172	0.567482		193.464	1.72516	192.466	2.79656	180.225	30.6053	193.464	1.72516
JG-TR8-2	747.269	107376	4.11779	19.7483	0.829883	0.234718	1.68501	0.0336328	1.46648	0.870307		213.245	3.07602	214.086	3.25246	223.333	19.1677	213.245	3.07602
JG-TR8-195	1054.06	95664	2.75475	19.596	0.686249	0.241311	1.50134	0.0343108	1.33532	0.889419		217.472	2.8555	219.493	2.9635	241.232	15.8021	217.472	2.8555
JG-TR8-144	150.55	274836	3.96782	19.4643	0.909104	0.309628	1.3735	0.0437287	1.02958	0.749603		275.904	2.78072	273.893	3.29726	256.759	20.9055	275.904	2.78072
JG-TR8-14	207.912	46748.1	3.48772	13.5619	0.795351	1.4876	1.18367	0.146384	0.876632	0.740607		880.664	7.21606	925.338	7.18741	1033.35	16.0899	1033.35	16.0899
JG-TR8-28	109.086	167373	2.37371	11.5726	0.882695	2.75258	1.55184	0.231132	1.27634	0.822471		1340.43	15.4468	1342.79	11.5586	1346.53	17.0432	1346.53	17.0432
JG-TR8-15	144.54	146809	1.0126	11.4359	0.743818	2.92327	1.37487	0.242565	1.15629	0.841016		1400.02	14.551	1387.95	10.4023	1369.44	14.316	1369.44	14.316
JG-TR8-127	377.345	328176	1.67218	11.1058	0.725863	3.0779	1.49529	0.248023	1.30729	0.874273		1428.27	16.7479	1427.2	11.4602	1425.59	13.8626	1425.59	13.8626
JG-TR8-52	175.659	92540.8	2.34218	11.0457	0.803001	3.12746	1.20366	0.250654	0.896657	0.74494		1441.85	11.5846	1439.47	9.26096	1435.94	15.3144	1435.94	15.3144
JG-TR8-120	297.27	111811	2.60485	10.9683	0.727004	2.77913	1.22413	0.221174	0.984862	0.804542		1288.08	11.4988	1349.94	9.14082	1449.35	13.8399	1449.35	13.8399
JG-TR8-105	263.524	153688	1.33834	5.73011	0.601844	11.8486	1.17799	0.492625	1.01264	0.859636		2582.02	21.5448	2592.51	11.0306	2600.7	10.0297	2600.7	10.0297
JG-TR8-81	208.823	96069.8	1.86086	5.12923	0.659956	14.5118	1.24631	0.540084	1.05724	0.848293		2783.8	23.9006	2783.78	11.8396	2783.74	10.8108	2783.74	10.8108
JG-TR8-92	93.1907	26740.6	1.66674	4.66336	0.616809	15.1393	1.22515	0.512264	1.05856	0.864021		2666.29	23.1153	2824.04	11.6697	2938.67	9.96525	2938.67	9.96525
TF-2 (Tts-SC3)
JG-Tts_SC3-43	192.844	477.986	1.02255	52.9766	13.8482	0.00778459	14.1855	0.00299232	3.07484	0.21676		19.2609	0.591359	7.87374	1.11261	NA	NA	19.2609	0.591359
JG-Tts_SC3-87	483.337	1404.73	9.23354	25.5833	2.52578	0.0165441	3.4377	0.00307105	2.332	0.67836		19.7669	0.460259	16.6612	0.568088	NA	NA	19.7669	0.460259
JG-Tts_SC3-16	309.343	22164.8	3.22578	20.1086	2.38622	0.021137	3.69019	0.003084	2.81486	0.762796		19.8501	0.557894	21.2385	0.775599	182.363	55.5902	19.8501	0.557894
JG-Tts_SC3-52	629.876	1258.36	1.99314	24.1465	3.17725	0.0176403	3.8902	0.00309063	2.24472	0.577019		19.8928	0.445849	17.7555	0.684721	NA	NA	19.8928	0.445849
JG-Tts_SC3-8	1038.45	2346.49	4.19179	23.3397	4.8856	0.018263	5.37616	0.00309282	2.24366	0.417335		19.9069	0.445953	18.3766	0.97907	NA	NA	19.9069	0.445953
JG-Tts_SC3-80	832.537	4047.36	5.27824	21.813	2.11354	0.0195601	2.86724	0.00309582	1.93752	0.675745		19.9261	0.385477	19.6693	0.558538	NA	NA	19.9261	0.385477
JG-Tts_SC3-100	621.618	1821	3.12852	21.2694	8.69585	0.0201641	8.94579	0.00311187	2.09985	0.234731		20.0292	0.419932	20.2706	1.79539	50.034	207.945	20.0292	0.419932
JG-Tts_SC3-53	410.992	1615.41	2.42734	25.6807	8.76654	0.0167671	9.10752	0.0031243	2.46877	0.27107		20.1091	0.495675	16.8838	1.52499	NA	NA	20.1091	0.495675
JG-Tts_SC3-107	544.072	5347.87	0.803557	21.9626	2.16325	0.0198666	3.28372	0.00316588	2.47046	0.752336		20.3763	0.502595	19.9745	0.649496	NA	NA	20.3763	0.502595
JG-Tts_SC3-38	322.552	1070.84	2.93326	28.745	3.72049	0.0152338	4.71359	0.0031773	2.89411	0.613992		20.4497	0.590899	15.3515	0.718165	NA	NA	20.4497	0.590899
JG-Tts_SC3-48	743.705	7086.74	5.84865	21.7064	2.00657	0.0203872	2.76664	0.00321095	1.90473	0.688461		20.6659	0.392999	20.4926	0.561275	1.2323	48.3591	20.6659	0.392999
JG-Tts_SC3-30	422.547	22414.3	2.88517	20.7477	2.34347	0.0213773	3.44916	0.00321817	2.53078	0.733738		20.7124	0.523344	21.4774	0.73301	109.021	55.3372	20.7124	0.523344
JG-Tts_SC3-55	1203.08	6019.84	6.25874	21.5812	1.43119	0.0223154	2.4119	0.00349436	1.94138	0.804916		22.4868	0.435793	22.4095	0.534575	15.1802	34.4003	22.4868	0.435793
JG-Tts_SC3-36	165.54	554.732	1.88186	5.39272	16.9345	0.0920026	17.3131	0.00359994	3.60101	0.207993		23.1651	0.832679	89.3671	14.812	2702.08	281.813	23.1651	0.832679
JG-Tts_SC3-92	1053.67	22905.7	1.4246	20.744	0.887041	0.0911773	2.05838	0.0137235	1.85745	0.90238		87.866	1.62099	88.5994	1.74642	109.409	20.9443	87.866	1.62099
JG-Tts_SC3-98	293.549	11645.8	2.66145	20.5961	1.53404	0.0951485	2.6575	0.0142192	2.17004	0.81657		91.0171	1.96123	92.2881	2.34441	126.318	36.1085	91.0171	1.96123
JG-Tts_SC3-77	632.253	18765.9	2.57721	20.5261	1.21081	0.0956	2.18727	0.0142381	1.82156	0.8328		91.1373	1.64844	92.7067	1.93793	134.304	28.4604	91.1373	1.64844
JG-Tts_SC3-102	413.412	8158.7	3.04119	20.1869	1.95939	0.0973948	2.61232	0.0142657	1.72771	0.661372		91.3127	1.5665	94.3687	2.35413	173.312	45.7167	91.3127	1.5665
JG-Tts_SC3-75	328.964	24572	2.66011	20.5455	1.44115	0.0958025	2.82875	0.0142817	2.43412	0.860491		91.4146	2.20944	92.8943	2.51114	132.107	33.8714	91.4146	2.20944
JG-Tts_SC3-59	729.189	4543.84	2.97132	21.0504	1.33009	0.0938634	2.48664	0.0143366	2.10101	0.844918		91.7633	1.9143	91.096	2.16659	74.6689	31.6011	91.7633	1.9143
JG-Tts_SC3-18	391.33	15710.5	3.22203	19.5464	1.69131	0.101151	2.69658	0.0143458	2.10024	0.778854		91.822	1.91481	97.8383	2.51517	248.055	38.9301	91.822	1.91481
JG-Tts_SC3-27	333.593	68898.2	4.17277	19.496	1.33497	0.101761	2.32733	0.0143951	1.9064	0.819134		92.1352	1.74397	98.4008	2.18265	254.026	30.7068	92.1352	1.74397
JG-Tts_SC3-3	451.161	12140.5	2.08363	20.4441	1.55692	0.0971408	2.98403	0.0144098	2.54567	0.853098		92.2284	2.33112	94.1336	2.68271	143.718	36.5103	92.2284	2.33112
JG-Tts_SC3-14	562.473	8689.55	3.23983	19.64	1.83222	0.101248	2.94473	0.0144283	2.3053	0.782855		92.3462	2.11368	97.9277	2.74902	237.035	42.2653	92.3462	2.11368
JG-Tts_SC3-50	648.753	10151.5	2.68872	20.6023	1.62663	0.096528	2.59256	0.0144297	2.01877	0.778679		92.3551	1.85114	93.5664	2.31735	125.562	38.2753	92.3551	1.85114
JG-Tts_SC3-32	467.925	11094	1.54035	20.1963	1.39597	0.0986778	3.00778	0.0144603	2.6642	0.885772		92.5498	2.4481	95.5551	2.743	172.223	32.5865	92.5498	2.4481
JG-Tts_SC3-84	422.476	19717	1.79162	20.8818	1.48373	0.0955781	2.58821	0.0144815	2.1207	0.81937		92.6842	1.95149	92.6864	2.29269	93.7748	35.1404	92.6842	1.95149
JG-Tts_SC3-76	643.493	53938.2	2.32255	19.5508	1.19177	0.102802	3.56541	0.0145833	3.36033	0.942482		93.3308	3.11363	99.3597	3.37478	247.532	27.4295	93.3308	3.11363
JG-Tts_SC3-99	382.756	10397.7	0.895138	20.6019	1.2058	0.0979593	2.15884	0.0146434	1.7907	0.829476		93.7128	1.66598	94.8909	1.95573	125.608	28.3882	93.7128	1.66598
JG-Tts_SC3-23	243.042	4073.17	3.58723	21.9616	1.62101	0.0920475	2.82253	0.0146678	2.31063	0.818638		93.8677	2.15322	89.4089	2.41568	NA	NA	93.8677	2.15322
JG-Tts_SC3-72	365.672	4445.12	4.02423	21.0715	1.53271	0.0959735	2.51337	0.0146735	1.99194	0.792539		93.9045	1.85696	93.0528	2.2348	72.2896	36.4476	93.9045	1.85696
JG-Tts_SC3-20	432.312	3528.57	2.55967	21.7651	1.25513	0.0931604	2.01631	0.0147123	1.57802	0.782629		94.1504	1.47491	90.4432	1.74475	NA	NA	94.1504	1.47491
JG-Tts_SC3-66	3349.34	34562.8	1.91982	20.2178	0.991326	0.100617	2.13003	0.0147602	1.88528	0.885098		94.4552	1.76777	97.346	1.97721	169.742	23.1497	94.4552	1.76777
JG-Tts_SC3-104	363.421	14176.5	3.82819	20.798	1.45708	0.0978998	2.6062	0.0147738	2.16083	0.829111		94.5412	2.02797	94.8358	2.3597	103.258	34.4404	94.5412	2.02797
JG-Tts_SC3-35	114.659	1138.24	1.92666	16.2659	8.65385	0.125838	9.10872	0.0148518	2.84246	0.312059		95.0366	2.68156	120.351	10.3381	656.034	185.948	95.0366	2.68156
JG-Tts_SC3-73	315.042	5533.84	2.30035	17.7976	2.89085	0.115463	3.3557	0.0149105	1.70402	0.507799		95.4094	1.61382	110.95	3.52696	459.786	64.1143	95.4094	1.61382
JG-Tts_SC3-6	766.799	6366.16	0.552814	21.4478	0.963558	0.0958416	2.37779	0.0149151	2.17381	0.914214		95.4388	2.05938	92.9306	2.1116	30.04	23.0857	95.4388	2.05938
JG-Tts_SC3-106	1191.16	32678.8	2.68994	20.7215	0.662327	0.0993742	1.74649	0.0149411	1.61603	0.925301		95.6041	1.53359	96.1985	1.60297	111.995	15.6481	95.6041	1.53359
JG-Tts_SC3-58	307.226	4216.1	4.36557	18.7522	4.24575	0.110083	4.82569	0.0149782	2.29367	0.475304		95.8399	2.18199	106.041	4.85912	342.758	96.117	95.8399	2.18199
JG-Tts_SC3-46	401.072	4177.72	0.960465	21.4963	2.46898	0.0961617	3.33051	0.0149987	2.23527	0.67115		95.9698	2.1293	93.2271	2.96667	24.6378	59.2204	95.9698	2.1293
JG-Tts_SC3-108	115.951	970.417	0.812023	29.6724	15.1121	0.0696723	15.269	0.0150003	2.18305	0.142973		95.9801	2.07977	68.3884	10.0986	NA	NA	95.9801	2.07977
JG-Tts_SC3-90	187.109	3500.21	2.46856	22.2834	2.26651	0.0929564	2.88032	0.0150296	1.77742	0.617089		96.1664	1.69659	90.2537	2.48742	NA	NA	96.1664	1.69659
JG-Tts_SC3-41	142.811	1176.6	1.49151	26.9307	4.01121	0.0771023	4.43762	0.0150661	1.89806	0.42772		96.3982	1.81608	75.417	3.22546	NA	NA	96.3982	1.81608
JG-Tts_SC3-7	480.107	11357.6	2.55666	20.8389	1.23735	0.0997748	2.26872	0.0150863	1.9016	0.838179		96.5265	1.82187	96.5684	2.08992	98.6146	29.2985	96.5265	1.82187
JG-Tts_SC3-81	387.41	2467.47	2.62435	18.307	4.18609	0.113925	4.8234	0.015133	2.3962	0.496788		96.8229	2.30274	109.55	5.00899	396.838	93.891	96.8229	2.30274
JG-Tts_SC3-105	670.076	11688.4	3.30905	19.8645	1.64481	0.10568	2.66314	0.015232	2.09451	0.786479		97.4514	2.02578	102.006	2.58457	210.767	38.1273	97.4514	2.02578
JG-Tts_SC3-68	879.403	12505	1.81156	20.5947	0.946955	0.102048	2.02706	0.0152493	1.79227	0.884174		97.5611	1.7354	98.6655	1.90591	126.482	22.2967	97.5611	1.7354
JG-Tts_SC3-89	395.406	86220.8	1.88288	19.9505	1.02743	0.105766	2.02366	0.0153105	1.74344	0.861528		97.9497	1.69478	102.085	1.9654	200.749	23.8708	97.9497	1.69478
JG-Tts_SC3-29	219.622	2950.07	1.78796	20.7877	2.48281	0.101591	3.09427	0.0153233	1.84666	0.596799		98.0309	1.7966	98.2441	2.89751	104.434	58.6704	98.0309	1.7966
JG-Tts_SC3-31	550.877	6982.89	5.23044	21.2226	1.11137	0.0999876	2.58033	0.0153969	2.32872	0.902491		98.4984	2.27632	96.7649	2.38157	55.3121	26.4982	98.4984	2.27632
JG-Tts_SC3-13	3684.66	268657	3.57728	20.8348	0.778272	0.102246	1.93229	0.015457	1.76863	0.915301		98.8797	1.73547	98.8476	1.82	99.1123	18.4133	98.8797	1.73547
JG-Tts_SC3-2	262.937	66769.8	3.02465	20.0519	1.72607	0.106678	2.89755	0.015521	2.32733	0.803206		99.2859	2.29301	102.922	2.83606	188.94	40.1678	99.2859	2.29301
JG-Tts_SC3-40	491.966	5503.05	5.66145	21.6175	1.67535	0.0990525	2.26668	0.0155367	1.52677	0.673574		99.386	1.50576	95.9014	2.07428	11.1287	40.3005	99.386	1.50576
JG-Tts_SC3-9	343.831	16049.8	2.66565	20.3936	0.86224	0.105207	2.22761	0.0155677	2.05397	0.922051		99.5829	2.02969	101.571	2.15313	149.522	20.1879	99.5829	2.02969
JG-Tts_SC3-42	533.872	153994	1.97399	19.9765	1.1229	0.107533	2.96079	0.0155866	2.73959	0.925291		99.7024	2.71043	103.707	2.91894	197.727	26.1103	99.7024	2.71043
JG-Tts_SC3-94	191.132	8466.06	0.838889	20.6326	1.62432	0.104214	2.47291	0.0156015	1.86464	0.754026		99.7973	1.84653	100.659	2.3698	122.107	38.2672	99.7973	1.84653
JG-Tts_SC3-1	852.555	22467.7	4.40168	20.5698	0.94824	0.10541	2.11072	0.0157327	1.88573	0.893406		100.63	1.88287	101.758	2.04371	129.321	22.302	100.63	1.88287
JG-Tts_SC3-69	301.422	17755.4	3.82976	20.4201	1.40793	0.106308	2.88212	0.0157511	2.51483	0.872562		100.747	2.51392	102.582	2.81212	146.479	33.0022	100.747	2.51392
JG-Tts_SC3-22	210.948	10434.3	4.01416	20.6748	1.71731	0.105287	2.78919	0.0157944	2.19782	0.787979		101.022	2.20297	101.645	2.6978	117.292	40.5097	101.022	2.20297
JG-Tts_SC3-83	312.853	4462.61	2.71486	21.9669	3.75953	0.099932	4.37874	0.015928	2.24484	0.512669		101.869	2.26884	96.7136	4.03943	NA	NA	101.869	2.26884
JG-Tts_SC3-110	283.988	23370.3	2.65295	20.7208	1.66158	0.107	2.85602	0.0160871	2.32293	0.813345		102.879	2.37084	103.218	2.80305	112.057	39.2061	102.879	2.37084
JG-Tts_SC3-109	309.746	83660.7	3.52009	20.0068	1.46331	0.110957	2.24598	0.0161072	1.70386	0.758628		103.006	1.74113	106.84	2.27768	194.225	34.0145	103.006	1.74113
JG-Tts_SC3-11	601.359	10059	2.43288	20.7851	1.28528	0.106844	2.93721	0.0161136	2.64107	0.899177		103.047	2.6999	103.075	2.87894	104.755	30.3745	103.047	2.6999
JG-Tts_SC3-24	240.447	6694.33	1.42069	20.5282	2.03272	0.108835	2.78366	0.0162109	1.9018	0.683199		103.664	1.95572	104.899	2.77428	134.087	47.7616	103.664	1.95572
JG-Tts_SC3-12	236.794	7464.73	2.96009	20.583	2.45969	0.108833	3.16567	0.0162539	1.99284	0.629516		103.937	2.05469	104.898	3.15495	127.819	57.8783	103.937	2.05469
JG-Tts_SC3-96	738.945	13422.4	3.9946	21.0007	1.22726	0.107223	2.23318	0.0163384	1.86573	0.835457		104.473	1.93347	103.422	2.19588	80.2803	29.145	104.473	1.93347
JG-Tts_SC3-10	180.265	7354.99	3.67166	20.5969	2.07758	0.110295	3.03969	0.0164833	2.21886	0.729965		105.392	2.31949	106.235	3.06603	126.23	48.9116	105.392	2.31949
JG-Tts_SC3-45	241.684	22222.9	2.20563	20.4271	1.537	0.111237	2.45082	0.0164872	1.90897	0.77891		105.416	1.996	107.097	2.49108	145.676	36.0427	105.416	1.996
JG-Tts_SC3-93	178.663	5066.63	2.4665	21.5761	1.89323	0.10596	3.16633	0.0165883	2.53797	0.801551		106.058	2.66969	102.263	3.08027	15.7191	45.479	106.058	2.66969
JG-Tts_SC3-95	230.409	10476.1	1.17407	21.0037	1.37659	0.109738	2.20079	0.0167239	1.71711	0.780224		106.918	1.82076	105.725	2.20976	79.9463	32.6812	106.918	1.82076
JG-Tts_SC3-47	1340.33	18856	4.45499	20.485	1.17121	0.114233	2.87139	0.0169792	2.62167	0.913032		108.536	2.82163	109.83	2.9891	139.038	27.5065	108.536	2.82163
JG-Tts_SC3-17	124.741	23776.1	1.95133	16.0934	2.39311	0.145785	3.15558	0.0170234	2.05687	0.65182		108.817	2.21943	138.183	4.07682	678.823	51.1649	108.817	2.21943
JG-Tts_SC3-67	258.976	12117.3	1.33859	20.5341	1.55212	0.114599	2.35097	0.0170744	1.76578	0.751086		109.139	1.91095	110.164	2.45438	133.391	36.4901	109.139	1.91095
JG-Tts_SC3-51	20.994	1433.74	3.59342	27.8389	4.33722	0.08469	5.63752	0.0171069	3.60142	0.63883		109.346	3.90478	82.5448	4.46938	NA	NA	109.346	3.90478
JG-Tts_SC3-19	72.8026	45289.4	2.572	20.2046	2.62032	0.117343	3.6097	0.0172026	2.4827	0.687787		109.952	2.70663	112.66	3.84921	171.264	61.1617	109.952	2.70663
JG-Tts_SC3-74	1022.96	46771.3	2.49667	20.6416	0.805854	0.115191	1.84805	0.0172525	1.6631	0.89992		110.268	1.81827	110.703	1.93827	121.115	18.9845	110.268	1.81827
JG-Tts_SC3-26	1559.68	40861.2	1.55598	20.6695	0.858348	0.115447	1.89703	0.0173141	1.69174	0.89178		110.659	1.85608	110.936	1.99361	117.935	20.2311	110.659	1.85608
JG-Tts_SC3-91	84.1227	3076.95	2.39728	20.963	2.56307	0.114172	3.21889	0.017366	1.94729	0.604958		110.988	2.14276	109.775	3.34923	84.5472	60.8341	110.988	2.14276
JG-Tts_SC3-82	84.3652	510.825	2.18067	5.50098	1.80507	0.43603	3.10943	0.0174038	2.53186	0.81425		111.227	2.79195	367.449	9.58686	2669.22	29.8903	111.227	2.79195
JG-Tts_SC3-57	280.155	18100.6	3.73394	20.8869	1.40136	0.116597	2.81618	0.0176706	2.44276	0.867401		112.917	2.73428	111.983	2.98596	93.1661	33.2042	112.917	2.73428
JG-Tts_SC3-88	495.169	73977.1	1.68367	19.8751	1.31657	0.122596	2.04258	0.0176797	1.56165	0.76455		112.975	1.7489	117.423	2.26497	209.541	30.5329	112.975	1.7489
JG-Tts_SC3-101	92.5984	20633.9	2.49533	20.1606	1.85654	0.121206	2.75407	0.0177303	2.03425	0.738635		113.295	2.28458	116.165	3.02306	176.355	43.3057	113.295	2.28458
JG-Tts_SC3-37	104.161	8871.03	1.94304	21.4399	2.01777	0.116581	3.36968	0.0181358	2.69877	0.800898		115.863	3.09896	111.968	3.57238	30.9442	48.3342	115.863	3.09896
JG-Tts_SC3-21	635.786	49858.4	2.26246	20.2731	0.959997	0.123711	2.19377	0.0181977	1.97257	0.899169		116.255	2.27266	118.431	2.45231	163.354	22.4218	116.255	2.27266
JG-Tts_SC3-78	492.966	7135.91	2.96083	21.3218	1.52075	0.118706	2.13014	0.0183648	1.49158	0.700227		117.313	1.734	113.899	2.29507	44.1457	36.3534	117.313	1.734
JG-Tts_SC3-4	333.825	8417.09	1.60004	19.9197	1.33326	0.132964	2.42156	0.0192178	2.02148	0.834784		122.711	2.45711	126.757	2.88565	204.31	30.9607	122.711	2.45711
JG-Tts_SC3-15	84.1087	2780.63	2.60453	21.4172	2.61104	0.12382	3.37653	0.0192416	2.1409	0.634053		122.861	2.60542	118.529	3.77743	33.497	62.5413	122.861	2.60542
JG-Tts_SC3-103	597.511	71119.8	1.84578	19.9713	1.05839	0.133454	2.18848	0.0193387	1.91552	0.875278		123.475	2.34269	127.197	2.61638	198.306	24.6043	123.475	2.34269
JG-Tts_SC3-86	235.562	5434.87	2.51157	20.7845	3.18779	0.12896	3.5524	0.0194484	1.56765	0.441294		124.169	1.92791	123.163	4.12032	104.797	75.3393	124.169	1.92791
JG-Tts_SC3-97	472.312	8881.05	1.87867	20.5455	1.18495	0.132394	2.47376	0.0197365	2.17148	0.877809		125.991	2.70931	126.246	2.93669	132.108	27.8541	125.991	2.70931
JG-Tts_SC3-65	884.458	16838.7	4.43963	20.738	1.10548	0.131987	2.6336	0.0198604	2.39035	0.907635		126.773	3.00072	125.882	3.11797	110.095	26.1019	126.773	3.00072
JG-Tts_SC3-34	31.6363	574.692	3.69632	33.0032	33.4915	0.0868479	33.5824	0.0207971	2.46927	0.0735287		132.692	3.24303	84.5628	27.2544	NA	NA	132.692	3.24303
JG-Tts_SC3-63	294.387	38901.4	19.1991	17.5144	1.06173	0.164923	2.91368	0.0209587	2.71335	0.931245		133.712	3.59071	155.003	4.1885	495.262	23.4003	133.712	3.59071
JG-Tts_SC3-62	141.138	2071.48	0.681174	17.7449	1.89606	0.180126	2.54859	0.023192	1.70302	0.66822		147.798	2.48839	168.169	3.94984	466.326	42.0107	147.798	2.48839
JG-Tts_SC3-49	224.212	7750.91	0.778124	20.647	1.54892	0.157367	2.60597	0.0235754	2.09569	0.804189		150.213	3.11161	148.396	3.59786	120.491	36.5119	150.213	3.11161
JG-Tts_SC3-61	73.6428	1775.63	1.27199	23.2423	6.87622	0.141599	7.20804	0.0238795	2.1618	0.299916		152.128	3.25021	134.467	9.0783	NA	NA	152.128	3.25021
JG-Tts_SC3-39	121.542	5459.99	1.09269	18.7206	2.08829	0.184164	2.78332	0.0250156	1.84009	0.661112		159.277	2.89492	171.637	4.3953	346.556	47.2375	159.277	2.89492
JG-Tts_SC3-60	447.759	11811.9	1.15935	20.1572	1.2946	0.173405	1.97074	0.0253618	1.48588	0.75397		161.454	2.36922	162.37	2.95716	176.743	30.1835	161.454	2.36922
JG-Tts_SC3-56	239.765	39653.3	1.49797	19.9476	1.26267	0.178263	2.14525	0.0258012	1.73429	0.808432		164.216	2.812	166.564	3.29554	201.083	29.3178	164.216	2.812
JG-Tts_SC3-5	223.827	9026.74	1.10603	20.5302	1.62769	0.173213	2.50218	0.0258025	1.90041	0.759499		164.224	3.0815	162.203	3.75106	133.84	38.2544	164.224	3.0815
JG-Tts_SC3-79	207.119	3655.42	3.41567	21.5966	4.5153	0.164681	5.58732	0.0258057	3.29091	0.588997		164.244	5.33685	154.792	8.02192	13.4622	108.585	164.244	5.33685
JG-Tts_SC3-28	1277.09	36213.5	0.963503	20.0387	0.691979	0.185441	1.75169	0.0269627	1.60922	0.918667		171.511	2.7236	172.732	2.78237	190.52	16.1127	171.511	2.7236
JG-Tts_SC3-33	479.125	474072	0.837463	18.8062	0.911404	0.206392	2.44596	0.0281631	2.26981	0.927985		179.042	4.008	190.52	4.24899	336.252	20.6526	179.042	4.008
JG-Tts_SC3-70	126.694	3136.78	1.09823	21.2112	4.44476	0.197958	4.81433	0.0304666	1.84984	0.384236		193.468	3.52568	183.397	8.07804	56.5656	106.02	193.468	3.52568
JG-Tts_SC3-71	237.602	39778.2	2.47391	17.0918	0.773548	0.592686	2.3642	0.073502	2.23407	0.944958		457.22	9.86078	472.582	8.93346	548.848	16.872	457.22	9.86078
JG-Tts_SC3-54	65.7692	45995.1	3.1862	13.2761	0.955419	1.71062	1.84643	0.164783	1.58002	0.855718		983.301	14.4095	1012.52	11.8322	1077.16	19.1642	1077.16	19.1642
JG-Tts_SC3-85	386.884	174356	17.3988	9.39302	0.591568	4.47018	1.53549	0.304662	1.41696	0.922806		1714.38	21.3303	1725.45	12.7416	1739.69	10.8426	1739.69	10.8426
† 800 Ma cutoff used between 206Pb*/238U and 206Pb*/207Pb* ages
Data reduction methods follow Gehrels et al. (2008)
Age uncertainties are reported at the 1-sigma level
